# Supplementary material for: New level of regulation of MITF activity by direct interaction with RAF proteins
Source: Research Square preprint supplement (doi:10.21203/rs.3.rs-404711/v1), 2021-04-15
Supplement: Supplementary file 1 [file 932fe6e50e3bdba8e3917c15.xlsx]

## Sheet: ARAF proteome
2700/2700 proteins	Gene & Synonyms	KO/shARAF						Total Peptides	MW (kDa)	Description	Species
		Ratio	Log2	p-value	CV %	Dist. pept. used	Pept. used
Q3UH66	Wnk2,Kiaa1760	1000	1000			26	135	135	227.5	Serine/threonine-protein kinase WNK2	Mus musculus
Q5SQX6	Cyfip2,Kiaa1168,Pir121	1000	1000			4	16	16	145.7	Cytoplasmic FMR1-interacting protein 2	Mus musculus
A2A9R3	Mageb4	1000	1000			3	15	15	60.9	Melanoma-associated antigen B4	Mus musculus
Q80UE6	Wnk4,Prkwnk4	1000	1000			3	15	15	132.4	Serine/threonine-protein kinase WNK4	Mus musculus
P26043	Rdx	1000	1000			3	14	14	68.5	Radixin	Mus musculus
Q60676	Ppp5c	1000	1000			3	14	14	56.9	Serine/threonine-protein phosphatase 5	Mus musculus
Q8R0W1	Cipc,Kiaa1737	1000	1000			3	14	14	46.3	CLOCK-interacting pacemaker	Mus musculus
Q9WTP2	Spry4	1000	1000			2	12	12	32.5	Protein sprouty homolog 4	Mus musculus
Q80Y14	Glrx5	1000	1000			2	10	10	16.3	Glutaredoxin-related protein 5, mitochondrial	Mus musculus
P70303	Ctps2	1000	1000			3	9	9	65.5	CTP synthase 2	Mus musculus
Q64521	Gpd2,Gdm1	1000	1000			2	9	9	81	Glycerol-3-phosphate dehydrogenase, mitochondrial	Mus musculus
Q8C0D0	Trub1	1000	1000			2	9	9	36.3	Probable tRNA pseudouridine synthase 1	Mus musculus
Q9ERE3	Sgk3,Cisk,Sgkl	1000	1000			1	9	9	57.1	Serine/threonine-protein kinase Sgk3	Mus musculus
Q9JMC8	Epb41l4b,Ehm2,Epb4.1l4b	1000	1000			3	9	9	59.6	Band 4.1-like protein 4B	Mus musculus
O54818	Tpd52l1	1000	1000			2	8	8	22.5	Tumor protein D53	Mus musculus
P37040	Por	1000	1000			2	8	8	77	NADPH--cytochrome P450 reductase	Mus musculus
Q9CZ44	Nsfl1c	1000	1000			2	7	7	40.7	NSFL1 cofactor p47	Mus musculus
Q9QXX4	Slc25a13,Aralar2	1000	1000			2	7	7	74.5	Calcium-binding mitochondrial carrier protein Aralar2	Mus musculus
P40336	Vps26a,Vps26	1000	1000			1	5	5	38.1	Vacuolar protein sorting-associated protein 26A	Mus musculus
P47879	Igfbp4,Igfbp-4	1000	1000			1	5	5	27.8	Insulin-like growth factor-binding protein 4	Mus musculus
P56873	Sssca1,C184l	1000	1000			1	5	5	21.3	Sjoegren syndrome/scleroderma autoantigen 1 homolog	Mus musculus
P58391	Kcnn3,Sk3	1000	1000			1	5	5	81.3	Small conductance calcium-activated potassium channel protein 3	Mus musculus
P70349	Hint1,Hint,Pkci,Pkci1,Prkcnh1	1000	1000			1	5	5	13.8	Histidine triad nucleotide-binding protein 1	Mus musculus
Q08874	Mitf,Bw,Mi,Vit	1000	1000			1	5	5	58.6	Microphthalmia-associated transcription factor	Mus musculus
Q3KQJ0	Tmem69	1000	1000			1	5	5	27.3	Transmembrane protein 69	Mus musculus
Q3UN04	Usp30	1000	1000			1	5	5	58.2	Ubiquitin carboxyl-terminal hydrolase 30	Mus musculus
Q61036	Pak3,Pak-3,Pakb,Stk4	1000	1000			1	5	5	62.4	Serine/threonine-protein kinase PAK 3	Mus musculus
Q68FH4	Galk2	1000	1000			1	5	5	50.5	N-acetylgalactosamine kinase	Mus musculus
Q6PD28	Ppp2r5b	1000	1000			1	5	5	57.3	Serine/threonine-protein phosphatase 2A 56 kDa regulatory subunit beta isoform	Mus musculus
Q810A3	Ttc9c	1000	1000			1	5	5	20	Tetratricopeptide repeat protein 9C	Mus musculus
Q8BXR9	Osbpl6	1000	1000			1	5	5	108.9	Oxysterol-binding protein-related protein 6	Mus musculus
Q8CIM8	Ints4	1000	1000			1	5	5	108.2	Integrator complex subunit 4	Mus musculus
Q8R1N0	Znf830,Ccdc16,Omcg1,Zfp830	1000	1000			1	5	5	40.7	Zinc finger protein 830	Mus musculus
Q920Q8	Ivns1abp,Kiaa0850,Nd1,Nd1L,Nd1S,Ns1,Ns1bp	1000	1000			1	5	5	71.6	Influenza virus NS1A-binding protein homolog	Mus musculus
Q9CQ25	Mzt2,Fam128b,Mozart2	1000	1000			1	5	5	16.5	Mitotic-spindle organizing protein 2	Mus musculus
Q9D1D6	Cthrc1	1000	1000			1	5	5	26.5	Collagen triple helix repeat-containing protein 1	Mus musculus
Q9D8X5	Cnot8	1000	1000			1	5	5	33.6	CCR4-NOT transcription complex subunit 8	Mus musculus
Q9DBJ1	Pgam1	1000	1000			1	5	5	28.8	Phosphoglycerate mutase 1	Mus musculus
Q9ESN6	Trim2,Kiaa0517,Narf	1000	1000			1	5	5	81.4	Tripartite motif-containing protein 2	Mus musculus
Q9QXM0	Abhd2,Labh-2,Labh2	1000	1000			1	5	5	48.4	Monoacylglycerol lipase ABHD2	Mus musculus
Q9QXN0	Shroom3,Kiaa1481,Shrm	1000	1000			1	5	5	214.9	Protein Shroom3	Mus musculus
Q9WU79	Prodh,Pro1	1000	1000			1	5	5	68	Proline dehydrogenase 1, mitochondrial	Mus musculus
A2A935	Prdm16,Kiaa1675,Mel1	1000	1000			1	4	4	140.9	PR domain zinc finger protein 16	Mus musculus
E9Q8I9	Fry,Kiaa4143	1000	1000			1	4	4	339.1	Protein furry homolog	Mus musculus
O35623	Bet1	1000	1000			1	4	4	13.3	BET1 homolog	Mus musculus
P16332	Mut	1000	1000			1	4	4	82.8	Methylmalonyl-CoA mutase, mitochondrial	Mus musculus
Q61334	Bcap29,Bap29	1000	1000			1	4	4	28	B-cell receptor-associated protein 29	Mus musculus
Q8CHH9	Sept8,Kiaa0202	1000	1000			2	4	4	49.8	Septin-8	Mus musculus
Q8VHJ5	Mark1,Emk3,Kiaa1477	1000	1000			2	4	4	88.3	Serine/threonine-protein kinase MARK1	Mus musculus
Q91W78	Usb1	1000	1000			1	4	4	30.3	U6 snRNA phosphodiesterase	Mus musculus
Q9D379	Ephx1	1000	1000			1	4	4	52.6	Epoxide hydrolase 1	Mus musculus
Q9DCS9	Ndufb10	1000	1000			1	4	4	21	NADH dehydrogenase [ubiquinone] 1 beta subcomplex subunit 10	Mus musculus
Q9R194	Cry2,Kiaa0658	1000	1000			1	4	4	66.9	Cryptochrome-2	Mus musculus
P09926	Surf2,Surf-2	1000	1000			1	3	3	30.4	Surfeit locus protein 2	Mus musculus
P46460	Nsf,Skd2	1000	1000			1	3	3	82.6	Vesicle-fusing ATPase	Mus musculus
P83887	Tubg1,Tubg	1000	1000			1	3	3	51.1	Tubulin gamma-1 chain	Mus musculus
Q7TN99	Cpeb3,Kiaa0940	1000	1000			2	3	3	78.3	Cytoplasmic polyadenylation element-binding protein 3	Mus musculus
Q8VCM4	Lipt1	1000	1000			1	3	3	42.1	Lipoyltransferase 1, mitochondrial	Mus musculus
Q8VCT3	Rnpep	1000	1000			1	3	3	72.4	Aminopeptidase B	Mus musculus
Q99K46	Usp11	1000	1000			1	3	3	105.4	Ubiquitin carboxyl-terminal hydrolase 11	Mus musculus
Q9CZW4	Acsl3,Acs3,Facl3	1000	1000			1	3	3	80.5	Long-chain-fatty-acid--CoA ligase 3	Mus musculus
O54990	Prom1,Prom,Proml1	1000	1000			1	2	2	97.1	Prominin-1	Mus musculus
Q8BKE6	Cyp20a1	1000	1000			1	2	2	52.1	Cytochrome P450 20A1	Mus musculus
Q8BXK8	Agap1,Centg2,Kiaa1099	1000	1000			1	2	2	94.4	Arf-GAP with GTPase, ANK repeat and PH domain-containing protein 1	Mus musculus
Q8K021	Scamp1	1000	1000			1	2	2	38	Secretory carrier-associated membrane protein 1	Mus musculus
Q8R570	Snap47	1000	1000			1	2	2	46.5	Synaptosomal-associated protein 47	Mus musculus
Q99L88	Sntb1,Snt2b1	1000	1000			1	2	2	58.1	Beta-1-syntrophin	Mus musculus
Q9CWL8	Ctnnbl1	1000	1000			1	2	2	65	Beta-catenin-like protein 1	Mus musculus
Q1XH17	Trim72 {ECO:0000312|MGI:MGI:3612190},Mg53 {ECO:0000312|EMBL:BAE93014.1}	1000	1000			1	1	1	52.8	Tripartite motif-containing protein 72	Mus musculus
Q6URW6	Myh14	1000	1000			1	1	1	228.6	Myosin-14	Mus musculus
Q8K0D0	Cdk17,Pctaire2,Pctk2	1000	1000			1	1	1	59.5	Cyclin-dependent kinase 17	Mus musculus
Q8R0S6	Wfikkn1,Gasp2	1000	1000			1	1	1	59.8	WAP, Kazal, immunoglobulin, Kunitz and NTR domain-containing protein 1	Mus musculus
Q91XE4	Acy3,Aspa2	124.299	6.95767	1.83548e-10	37.4842	7	50	56	35.3	N-acyl-aromatic-L-amino acid amidohydrolase (carboxylate-forming)	Mus musculus
C8YR32	Loxhd1	84.7006	6.4043	8.4694e-05		1	7	7	235.8	Lipoxygenase homology domain-containing protein 1	Mus musculus
P41216	Acsl1,Acsl2,Facl2	84.7006	6.4043	8.4694e-05		1	7	7	78	Long-chain-fatty-acid--CoA ligase 1	Mus musculus
P26187	Mgmt	80.1806	6.32518	4.05546e-06	26.7233	2	14	14	22.4	Methylated-DNA--protein-cysteine methyltransferase	Mus musculus
Q3V140	Acrbp	62.4075	5.96365	1.69089e-06		1	9	9	61.1	Acrosin-binding protein	Mus musculus
Q9ER47	Kcnh7,Erg3	55.8581	5.80369	0.000269473		1	9	9	135.1	Potassium voltage-gated channel subfamily H member 7	Mus musculus
P70175	Dlg3,Dlgh3	54.836	5.77705	0.000149569		1	9	9	93.5	Disks large homolog 3	Mus musculus
Q50H33	Kctd8	52.8025	5.72253	0.00250463		1	9	9	52.8	BTB/POZ domain-containing protein KCTD8	Mus musculus
Q91V76		51.6895	5.6918	1.50378e-06	14.3924	3	17	17	35	Ester hydrolase C11orf54 homolog	Mus musculus
Q9WTL8	Arntl,Bmal1	29.885	4.90135	0.000476834		1	7	7	69.5	Aryl hydrocarbon receptor nuclear translocator-like protein 1	Mus musculus
Q99MY8	Ash1l	24.532	4.6166	0.00197215		1	9	9	331.3	Histone-lysine N-methyltransferase ASH1L	Mus musculus
P70211	Dcc	23.5875	4.55995	0.00175108		1	9	9	158.3	Netrin receptor DCC	Mus musculus
Q3UMF0	Cobll1,Coblr1,Kiaa0977	22.7276	4.50637	1.72751e-07	6.66187	2	12	12	137.4	Cordon-bleu protein-like 1	Mus musculus
Q923T7	Trim7,Gnip	22.2861	4.47807	5.00283e-06	13.2916	2	14	22	57	Tripartite motif-containing protein 7	Mus musculus
P11352	Gpx1	21.9328	4.45502	1.3791e-07	22.5837	2	18	25	22.2	Glutathione peroxidase 1	Mus musculus
P11881	Itpr1,Insp3r,Pcd6,Pcp1	21.359	4.41677	0.000178419	12.2465	2	14	14	313.2	Inositol 1,4,5-trisphosphate receptor type 1	Mus musculus
Q61390	Cct6b	20.884	4.38433	6.26578e-05	33.5784	1	18	18	58.2	T-complex protein 1 subunit zeta-2	Mus musculus
Q8R2U2	Nepro	20.2229	4.33792	8.68066e-05		1	9	9	63.4	Nucleolus and neural progenitor protein	Mus musculus
O09012	Pex5,Pxr1	18.2335	4.18852	1.17257e-05		1	9	9	70.8	Peroxisomal targeting signal 1 receptor	Mus musculus
Q9CQM9	Glrx3,Picot,Txnl2	18.0777	4.17614	2.32835e-13	23.1712	5	41	56	37.8	Glutaredoxin-3	Mus musculus
Q99PS0	Krt23,Haik1,Krt1-23	17.8072	4.15439	3.59257e-28	28.731	14	101	120	48	Keratin, type I cytoskeletal 23	Mus musculus
Q62415	Ppp1r13b,Aspp1	17.1004	4.09595	0.000416481		1	7	7	119.2	Apoptosis-stimulating of p53 protein 1	Mus musculus
Q7TMC8	Fuk	15.9213	3.99289	1.56855e-08	6.71503	2	13	21	119.3	L-fucose kinase	Mus musculus
Q8K2J7	Rell1	15.8593	3.98726	0.00421675		1	9	9	29.4	RELT-like protein 1	Mus musculus
Q68FF6	Git1	15.6465	3.96777	3.20713e-11	58.8984	15	109	116	85.3	ARF GTPase-activating protein GIT1	Mus musculus
Q6S5L9	Shc4,Shcd	15.5091	3.95504	0.000135456		1	8	8	68.5	SHC-transforming protein 4	Mus musculus
Q9ES28	Arhgef7,Kiaa0142,Pak3bp	15.5058	3.95474	3.62783e-25	49.7273	23	189	198	97.1	Rho guanine nucleotide exchange factor 7	Mus musculus
Q8BNW9	Kbtbd11,Kiaa0711	14.3092	3.83887	0.00013613		1	8	8	67.9	Kelch repeat and BTB domain-containing protein 11	Mus musculus
Q62468	Vil1,Vil	13.8481	3.79162	0.0239588		1	7	7	92.8	Villin-1	Mus musculus
Q9ERH8	Slc28a3,Cnt3	13.6963	3.77572	0.0158874		1	7	7	78.3	Solute carrier family 28 member 3	Mus musculus
Q9JHC0	Gpx2	13.4688	3.75155	5.16229e-06	26.4224	2	14	21	21.8	Glutathione peroxidase 2	Mus musculus
Q99MH6	Nkd1	13.3232	3.73586	4.56278e-06	7.17001	2	12	12	52.4	Protein naked cuticle homolog 1	Mus musculus
A2AJT4	Pnisr,Sfrs18,Srrp130	12.9463	3.69447	0.000341261		1	9	9	92.1	Arginine/serine-rich protein PNISR	Mus musculus
O88522	Ikbkg,Nemo	12.2564	3.61547	0.000189044		1	9	9	48	NF-kappa-B essential modulator	Mus musculus
P08556	Nras	12.1165	3.5989	0.00958084	63.8441	2	13	13	21.2	GTPase NRas	Mus musculus
Q61081	Cdc37	12.1031	3.59731	1.93708e-33	55.8333	28	290	322	44.6	Hsp90 co-chaperone Cdc37	Mus musculus
Q61666	Hira,Tuple1	12.0147	3.58673	6.32455e-45	45.0791	30	291	308	111.8	Protein HIRA	Mus musculus
Q3V3Q7	Pacs2,Kiaa0602,Pacs1l	11.546	3.52933	0.00458563		1	7	7	94.9	Phosphofurin acidic cluster sorting protein 2	Mus musculus
Q7TSZ8	Nacc1,Btbd14b,Nac1	11.4173	3.51315	4.01498e-06		1	9	9	56.5	Nucleus accumbens-associated protein 1	Mus musculus
Q9WUR2	Eci2,Peci	11.267	3.49403	0.00521252	32.9835	2	12	18	43.3	Enoyl-CoA delta isomerase 2, mitochondrial	Mus musculus
O55033	Nck2,Grb4	11.0349	3.464	0.000835169		1	8	8	42.9	Cytoplasmic protein NCK2	Mus musculus
Q4G0F8	Ubn1	10.8372	3.43793	9.31979e-52	39.6053	29	276	276	122.3	Ubinuclein-1	Mus musculus
Q9QY15	Ddx25,Grth	10.6834	3.41729	2.44381e-14	41.8284	11	97	109	54.9	ATP-dependent RNA helicase DDX25	Mus musculus
P20108	Prdx3,Aop1,Mer5	10.5942	3.4052	0.00111863		1	9	9	28.1	Thioredoxin-dependent peroxide reductase, mitochondrial	Mus musculus
Q8K4B0	Mta1	10.4151	3.38061	1.14708e-21	34.1667	11	97	117	80.8	Metastasis-associated protein MTA1	Mus musculus
Q04207	Rela,Nfkb3	10.3821	3.37603	1.73575e-10	26.819	4	37	37	60.2	Transcription factor p65	Mus musculus
Q8BKX1	Baiap2	10.3802	3.37576	9.68676e-26	58.591	26	235	249	59.2	Brain-specific angiogenesis inhibitor 1-associated protein 2	Mus musculus
Q8CIN4	Pak2	10.3705	3.37442	1.29867e-21	33.287	14	114	129	57.9	Serine/threonine-protein kinase PAK 2	Mus musculus
Q9R062	Gyg1,Gyg	10.3478	3.37125	3.31337e-05		1	8	8	37.4	Glycogenin-1	Mus musculus
Q08509	Eps8	10.2958	3.36398	2.7464e-36	46.8988	32	248	276	91.7	Epidermal growth factor receptor kinase substrate 8	Mus musculus
Q80VP0	Tecpr1,Kiaa1358	10.0844	3.33405	2.16262e-11	48.2602	11	91	111	130.3	Tectonin beta-propeller repeat-containing protein 1	Mus musculus
Q8R1N4	Nudcd3,Kiaa1068	9.865	3.30232	0.00273825		1	7	7	40.9	NudC domain-containing protein 3	Mus musculus
P50544	Acadvl,Vlcad	9.84806	3.29984	3.12615e-06	22.2326	2	16	16	70.9	Very long-chain specific acyl-CoA dehydrogenase, mitochondrial	Mus musculus
P19157	Gstp1,Gstpib	9.84474	3.29935	0.000781064	48.4764	2	22	22	23.6	Glutathione S-transferase P 1	Mus musculus
Q9CQF9	Pcyox1,Kiaa0908	9.81045	3.29432	6.44931e-05		1	9	9	56.5	Prenylcysteine oxidase	Mus musculus
P80316	Cct5,Ccte,Kiaa0098	9.63034	3.26759	1.85984e-48	40.0624	29	280	301	59.6	T-complex protein 1 subunit epsilon	Mus musculus
P0CB42	Alkbh1,Abh,Alkbh	9.56877	3.25833	4.33165e-06	28.3135	4	29	29	43.7	Nucleic acid dioxygenase ALKBH1	Mus musculus
Q62392	Phlda1,Tdag51	9.47157	3.2436	2.51332e-07	16.7644	2	18	27	45.6	Pleckstrin homology-like domain family A member 1	Mus musculus
P56546	Ctbp2	9.20086	3.20177	0.000429299		1	9	23	49	C-terminal-binding protein 2	Mus musculus
Q8VCU0	Angel1 {ECO:0000312|MGI:MGI:1915987},Kiaa0759 {ECO:0000312|EMBL:BAD90417.1}	9.06212	3.17985	4.27171e-06	50.7142	4	39	39	75.3	Protein angel homolog 1	Mus musculus
Q9EP53	Tsc1,Kiaa0243	8.98859	3.1681	1.08944e-05	18.6389	2	14	14	128.7	Hamartin	Mus musculus
Q8VE62	Paip1	8.80233	3.13788	2.28477e-05		1	8	8	45.7	Polyadenylate-binding protein-interacting protein 1	Mus musculus
Q3UFY7	Nt5c3b,Nt5c3l	8.78191	3.13454	0.000173713		1	9	9	34.4	7-methylguanosine phosphate-specific 5'-nucleotidase	Mus musculus
Q80U72	Scrib,Kiaa0147,Lap4,Scrib1	8.76463	3.13169	3.70858e-20	38.1993	16	116	123	174.1	Protein scribble homolog	Mus musculus
Q9D0K2	Oxct1,Oxct,Scot	8.50574	3.08844	3.91084e-14	32.6594	11	74	82	56	Succinyl-CoA:3-ketoacid coenzyme A transferase 1, mitochondrial	Mus musculus
Q99MI1	Erc1,Cast2,Kiaa1081,Rab6ip2	8.46568	3.08163	0.000999267		1	9	9	128.3	ELKS/Rab6-interacting/CAST family member 1	Mus musculus
Q9CQ39	Med21,Srb7,Surb7	8.32932	3.0582	5.83593e-05	58.8762	3	36	36	15.6	Mediator of RNA polymerase II transcription subunit 21	Mus musculus
P80313	Cct7,Ccth	8.2988	3.0529	7.55488e-21	56.6783	22	187	209	59.7	T-complex protein 1 subunit eta	Mus musculus
Q78JW9	Ubfd1,D7Wsu128e	8.26781	3.0475	0.00595027		1	8	8	40.1	Ubiquitin domain-containing protein UBFD1	Mus musculus
Q99KQ4	Nampt,Pbef1	8.24525	3.04356	3.03881e-08	51.1883	6	52	65	55.4	Nicotinamide phosphoribosyltransferase	Mus musculus
O88696	Clpp	8.24301	3.04317	0.00297861		1	8	8	29.8	ATP-dependent Clp protease proteolytic subunit, mitochondrial	Mus musculus
P80317	Cct6a,Cct6,Cctz,Cctz1	8.19483	3.03471	5.8599e-26	53.8544	24	211	233	58	T-complex protein 1 subunit zeta	Mus musculus
P48754	Brca1	8.19435	3.03463	0.000410313		1	8	8	198.8	Breast cancer type 1 susceptibility protein homolog	Mus musculus
Q9CPN8	Igf2bp3,Vickz3	8.18138	3.03234	9.80831e-58	43.0272	36	335	350	63.6	Insulin-like growth factor 2 mRNA-binding protein 3	Mus musculus
Q9JM58	Crlf1,Crlm3	8.17964	3.03204	0.00178116	42.2604	2	14	14	46.7	Cytokine receptor-like factor 1	Mus musculus
Q8BHD8	Pcmtd2	8.17578	3.03136	1.59096e-10	32.4754	4	42	49	40.8	Protein-L-isoaspartate O-methyltransferase domain-containing protein 2	Mus musculus
Q9CR98	Fam136a	8.10587	3.01897	0.00192641		1	9	9	15.7	Protein FAM136A	Mus musculus
B9EJA2	Cttnbp2,Kiaa1758	8.08028	3.01441	0.000123476		1	7	7	178.8	Cortactin-binding protein 2	Mus musculus
P04627	Araf,A-raf,Araf1	8.06635	3.01192	1.21832e-28	83.3789	43	432	536	67.6	Serine/threonine-protein kinase A-Raf	Mus musculus
B2RQC6	Cad	7.98999	2.99819	1.06337e-42	43.3346	35	286	349	243.2	CAD protein	Mus musculus
Q8C4P0		7.95689	2.9922	2.20845e-07	36.7817	6	44	44	79.1	Uncharacterized protein KIAA1958 homolog	Mus musculus
Q9JHU2	Palmd	7.94026	2.98919	0.00130211	33.9582	2	12	12	62.7	Palmdelphin	Mus musculus
Q9D772	Fam219a	7.88575	2.97925	0.00872801		1	7	7	17.5	Protein FAM219A	Mus musculus
Q8VCW8	Acsf2	7.77637	2.9591	0.00603796		1	7	7	68	Acyl-CoA synthetase family member 2, mitochondrial	Mus musculus
B1AR13	Cisd3,Mel-13,Mel13	7.71449	2.94757	0.000725134		1	9	9	15.7	CDGSH iron-sulfur domain-containing protein 3, mitochondrial	Mus musculus
Q9EPE9	Atp13a1,Atp13a	7.664	2.9381	0.000453138	55.3325	2	15	15	132.4	Manganese-transporting ATPase 13A1	Mus musculus
P80315	Cct4,Cctd	7.6369	2.93299	1.63327e-40	50.3472	32	301	320	58.1	T-complex protein 1 subunit delta	Mus musculus
P28741	Kif3a,Kif3	7.63305	2.93226	1.02915e-19	30.9677	10	89	89	80.2	Kinesin-like protein KIF3A	Mus musculus
Q8K337	Inpp5b	7.59425	2.92491	0.0051547		1	7	7	112.8	Type II inositol 1,4,5-trisphosphate 5-phosphatase	Mus musculus
Q04690	Nf1	7.52153	2.91103	3.09253e-09	14.6203	3	23	23	319.6	Neurofibromin	Mus musculus
P42932	Cct8,Cctq	7.49917	2.90673	6.02476e-27	58.131	28	257	333	59.6	T-complex protein 1 subunit theta	Mus musculus
Q80WC1	Ubn2,Kiaa2030	7.46969	2.90105	2.16357e-46	47.2266	37	316	331	141.7	Ubinuclein-2	Mus musculus
P80314	Cct2,Cctb	7.41309	2.89008	1.11667e-21	54.5721	21	191	235	57.5	T-complex protein 1 subunit beta	Mus musculus
P07901	Hsp90aa1,Hsp86,Hsp86-1,Hspca	7.40573	2.88864	2.48019e-33	60.2401	33	329	341	84.8	Heat shock protein HSP 90-alpha	Mus musculus
Q9CZ42	Carkd	7.34868	2.87749	3.10664e-05	10.0759	2	12	12	36.7	ATP-dependent (S)-NAD(P)H-hydrate dehydratase	Mus musculus
Q8CAF4	Nhsl1,Kiaa1357	7.34303	2.87638	0.000218212	47.0487	4	25	25	169.4	NHS-like protein 1	Mus musculus
Q9D7B6	Acad8	7.32674	2.87317	0.00161373		1	8	8	45	Isobutyryl-CoA dehydrogenase, mitochondrial	Mus musculus
P11983	Tcp1,Cct1,Ccta	7.31725	2.8713	8.10741e-29	55.7755	27	241	287	60.4	T-complex protein 1 subunit alpha	Mus musculus
Q00623	Apoa1	7.25293	2.85856	0.0444932		1	9	9	30.6	Apolipoprotein A-I	Mus musculus
P55200	Kmt2a,All1,Hrx,Mll,Mll1	7.04505	2.81661	0.000476254	37.14	2	18	18	429.6	Histone-lysine N-methyltransferase 2A	Mus musculus
Q9JJD0	Thap11,MNCb-2032	6.95932	2.79895	3.75555e-05	51.9743	5	39	39	33.3	THAP domain-containing protein 11	Mus musculus
Q99LQ1	Mbip	6.9455	2.79608	2.09973e-17	35.7223	10	83	89	38.3	MAP3K12-binding inhibitory protein 1	Mus musculus
Q8CHV6	Tada2a,Tada2l	6.93513	2.79392	1.99126e-06	26.1946	4	25	25	51.3	Transcriptional adapter 2-alpha	Mus musculus
Q9CY52	Thg1l	6.89665	2.7859	0.0151247		1	7	7	35	Probable tRNA(His) guanylyltransferase	Mus musculus
Q9CQR4	Acot13,Them2	6.86529	2.77932	0.000205987	31.2268	2	15	15	15.2	Acyl-coenzyme A thioesterase 13	Mus musculus
Q922B1	Macrod1,Lrp16	6.77075	2.75932	0.000123476	18.2329	2	14	14	35.3	O-acetyl-ADP-ribose deacetylase MACROD1	Mus musculus
Q6P2K6	Smek1,Kiaa2010,Pp4r3a,Ppp4r3a	6.69462	2.743	0.000223712		1	9	9	93.8	Serine/threonine-protein phosphatase 4 regulatory subunit 3A	Mus musculus
Q9QXW9	Slc7a8,Lat2	6.68628	2.7412	0.00235962		1	7	7	57.9	Large neutral amino acids transporter small subunit 2	Mus musculus
O08997	Atox1	6.57555	2.71711	0.00173038		1	9	16	7.3	Copper transport protein ATOX1	Mus musculus
Q3U0V2	Tradd	6.56469	2.71473	0.00152288		1	9	9	34.6	Tumor necrosis factor receptor type 1-associated DEATH domain protein	Mus musculus
D3Z2R5	Selenon,Seln,Sepn1	6.55823	2.71331	0.0195481		1	7	7	62.3	Selenoprotein N	Mus musculus
Q91V12	Acot7,Bach	6.4949	2.69931	3.59049e-05	34.6364	6	43	43	42.5	Cytosolic acyl coenzyme A thioester hydrolase	Mus musculus
Q3TW96	Uap1l1	6.48653	2.69745	0.00129219		1	9	16	56.6	UDP-N-acetylhexosamine pyrophosphorylase-like protein 1	Mus musculus
O35387	Hax1,Hs1bp1	6.47386	2.69463	0.000680571		1	9	9	31.7	HCLS1-associated protein X-1	Mus musculus
Q99P91	Gpnmb,Dchil,Nmb	6.469	2.69354	0.0691389	43.3799	2	9	9	63.7	Transmembrane glycoprotein NMB	Mus musculus
Q8VHR5	Gatad2b	6.44199	2.68751	6.8935e-39	49.6147	32	278	281	65.4	Transcriptional repressor p66-beta	Mus musculus
Q8K4Q6	Neil1,Nei1	6.4186	2.68226	0.0370513		1	7	7	43.6	Endonuclease 8-like 1	Mus musculus
Q6GQX2	Nckap5l	6.3993	2.67791	2.93414e-08	11.9078	2	18	18	138.2	Nck-associated protein 5-like	Mus musculus
Q00612	G6pdx,G6pd,G6pd-1	6.35445	2.66777	1.16424e-10	16.1841	2	32	32	59.3	Glucose-6-phosphate 1-dehydrogenase X	Mus musculus
Q8BKX6	Smg1,Kiaa0421	6.20509	2.63345	0.000383959		1	8	8	409.8	Serine/threonine-protein kinase SMG1	Mus musculus
Q60790	Rasa3	6.17781	2.6271	3.86229e-14	41.2811	12	92	97	96	Ras GTPase-activating protein 3	Mus musculus
Q0VGY8	Tanc1	6.15475	2.6217	3.38154e-07	61.7999	8	62	73	200.8	Protein TANC1	Mus musculus
Q91WD5	Ndufs2	6.15393	2.62151	1.75138e-05	20.5518	2	17	17	52.6	NADH dehydrogenase [ubiquinone] iron-sulfur protein 2, mitochondrial	Mus musculus
Q62176	Rbm38,Rnpc1,Seb4,Seb4l	6.13333	2.61667	0.0443048		1	8	8	25.4	RNA-binding protein 38	Mus musculus
Q2TPA8	Hsdl2	6.13266	2.61651	0.00633305		1	9	9	54.2	Hydroxysteroid dehydrogenase-like protein 2	Mus musculus
P31938	Map2k1,Mek1,Prkmk1	6.09767	2.60826	5.35039e-16	47.4831	12	115	123	43.5	Dual specificity mitogen-activated protein kinase kinase 1	Mus musculus
Q99PM9	Uck2,Umpk	6.07358	2.60255	1.68616e-14	79.1734	20	216	262	29.4	Uridine-cytidine kinase 2	Mus musculus
Q91XU0	Wrnip1,Whip	6.04857	2.59659	2.6866e-14	49.4878	11	110	110	71.8	ATPase WRNIP1	Mus musculus
Q8CC88	Vwa8,Kiaa0564	6.02273	2.59042	0.0228866	59.2465	2	15	15	213.4	von Willebrand factor A domain-containing protein 8	Mus musculus
Q9WV80	Snx1	5.99223	2.58309	3.16109e-13	27.2976	8	63	63	59	Sorting nexin-1	Mus musculus
Q8R3B7	Brd8	5.98414	2.58114	0.000887946		1	9	9	102.6	Bromodomain-containing protein 8	Mus musculus
Q9DCL8	Ppp1r2	5.86755	2.55276	0.0746582		1	6	6	23.1	Protein phosphatase inhibitor 2	Mus musculus
Q9EQ20	Aldh6a1	5.82259	2.54166	7.5642e-07	50.1702	8	58	58	57.9	Methylmalonate-semialdehyde dehydrogenase [acylating], mitochondrial	Mus musculus
P27641	Xrcc5,G22p2	5.7862	2.53262	0.00036493	28.8271	2	15	15	83.1	X-ray repair cross-complementing protein 5	Mus musculus
Q923J1	Trpm7,Chak,Ltrpc7	5.77862	2.53073	3.45166e-33	38.8726	24	205	214	212.4	Transient receptor potential cation channel subfamily M member 7	Mus musculus
P62748	Hpcal1	5.72958	2.51843	0.00860389	29.4435	2	11	11	22.3	Hippocalcin-like protein 1	Mus musculus
Q9R0P5	Dstn,Dsn,Sid23	5.71899	2.51576	0.0747095	46.2532	2	9	14	18.5	Destrin	Mus musculus
Q924K8	Mta3	5.66608	2.50235	4.75919e-06	18.9111	2	15	15	67.1	Metastasis-associated protein MTA3	Mus musculus
Q922H4	Gmppa	5.65804	2.5003	1.71788e-06	18.5921	2	17	17	46.2	Mannose-1-phosphate guanyltransferase alpha	Mus musculus
O35066	Kif3c	5.61947	2.49043	9.98645e-12	11.3865	3	26	34	90	Kinesin-like protein KIF3C	Mus musculus
P80318	Cct3,Cctg	5.61342	2.48888	3.40366e-13	72.0479	23	190	220	60.6	T-complex protein 1 subunit gamma	Mus musculus
Q3TJ91	Llgl2,Llglh2	5.56254	2.47574	0.0531555		1	7	7	114.3	Lethal(2) giant larvae protein homolog 2	Mus musculus
Q9D892	Itpa	5.50751	2.4614	0.0566618	38.5667	2	11	11	21.9	Inosine triphosphate pyrophosphatase	Mus musculus
Q62188	Dpysl3,Drp3,Ulip	5.4503	2.44634	6.54397e-10	55.3111	13	105	120	61.9	Dihydropyrimidinase-related protein 3	Mus musculus
B1AVY7	Kif16b,Kiaa1590	5.40395	2.43402	0.00242186		1	9	9	150.1	Kinesin-like protein KIF16B	Mus musculus
Q8BIJ6	Iars2	5.3961	2.43192	0.00552417		1	7	7	112.8	Isoleucine--tRNA ligase, mitochondrial	Mus musculus
Q6KAQ7	Zzz3	5.38743	2.4296	8.91001e-19	46.995	17	144	149	102.3	ZZ-type zinc finger-containing protein 3	Mus musculus
Q9WVA2	Timm8a1,Ddp1,Tim8a,Timm8a	5.36731	2.4242	0.00159131		1	9	9	11	Mitochondrial import inner membrane translocase subunit Tim8 A	Mus musculus
P50171	Hsd17b8,H2-Ke6,Hke6	5.36461	2.42347	0.000326514	8.88234	2	13	13	26.6	Estradiol 17-beta-dehydrogenase 8	Mus musculus
Q8VDY9	Caap1,Caap	5.35145	2.41993	5.02728e-07	71.5883	7	72	90	37.8	Caspase activity and apoptosis inhibitor 1	Mus musculus
P61079	Ube2d3	5.34713	2.41877	0.00510003	67.5238	3	24	24	16.7	Ubiquitin-conjugating enzyme E2 D3	Mus musculus
O89051	Itm2b	5.32233	2.41206	0.025059		1	8	8	30.3	Integral membrane protein 2B	Mus musculus
Q9D2N4	Dtna,Dtn	5.31243	2.40937	0.00078697		1	7	7	84.1	Dystrobrevin alpha	Mus musculus
Q9DBG5	Plin3,M6prbp1,Tip47	5.30637	2.40772	2.46516e-06	42.3094	6	39	39	47.3	Perilipin-3	Mus musculus
Q60809	Cnot7,Caf1	5.25885	2.39475	0.00078697	26.3234	3	17	17	32.7	CCR4-NOT transcription complex subunit 7	Mus musculus
Q8K212	Pacs1	5.25045	2.39244	9.00749e-35	82.6465	57	571	630	104.8	Phosphofurin acidic cluster sorting protein 1	Mus musculus
O08756	Hsd17b10,Erab,Hadh2	5.2493	2.39213	7.38172e-05	40.7863	2	23	23	27.4	3-hydroxyacyl-CoA dehydrogenase type-2	Mus musculus
Q91YD9	Wasl	5.23783	2.38897	3.69361e-07	52.1784	4	43	43	54.3	Neural Wiskott-Aldrich syndrome protein	Mus musculus
Q64105	Spr	5.23135	2.38718	0.00233656	22.648	2	10	10	27.9	Sepiapterin reductase	Mus musculus
Q99JX3	Gorasp2	5.22394	2.38514	4.14404e-05	18.2417	2	17	17	47	Golgi reassembly-stacking protein 2	Mus musculus
Q921I6	Sh3bp4	5.2121	2.38186	0.0267121	41.381	2	12	21	107.6	SH3 domain-binding protein 4	Mus musculus
Q78J03	Msrb2	5.21075	2.38149	0.00653584	57.991	2	15	15	19.2	Methionine-R-sulfoxide reductase B2, mitochondrial	Mus musculus
P52875	Tmem165,Tparl	5.19281	2.37652	0.000293422	63.6858	4	26	26	34.8	Transmembrane protein 165	Mus musculus
Q9EQH3	Vps35,Mem3	5.18043	2.37307	8.76403e-06	30.1883	3	19	19	91.7	Vacuolar protein sorting-associated protein 35	Mus musculus
Q3UZ45	Mcidas,Gm6320,Idas,Mci,Mcin	5.17169	2.37064	0.0551466		1	9	9	41.1	Multicilin	Mus musculus
Q8VE22	Mrps23	5.14539	2.36328	0.000481824	70.0929	5	39	39	20.3	28S ribosomal protein S23, mitochondrial	Mus musculus
P28352	Apex1,Ape,Apex,Ref1	5.14077	2.36199	3.69078e-06	51.2949	6	45	45	35.5	DNA-(apurinic or apyrimidinic site) lyase	Mus musculus
Q9R0Z9	Dlc1,Arhgap7,Stard12	5.1314	2.35935	0.000653107	61.7121	5	31	31	123.4	Rho GTPase-activating protein 7	Mus musculus
O54879	Hmgb3,Hmg2a,Hmg4	5.12887	2.35864	3.82419e-09	63.4543	8	95	95	23	High mobility group protein B3	Mus musculus
Q8CFE2		5.11772	2.3555	7.27367e-07	34.4897	5	37	45	39.3	Histone PARylation factor 1	Mus musculus
Q8K268	Abcf3	5.11415	2.35449	0.0237552		1	9	9	79.9	ATP-binding cassette sub-family F member 3	Mus musculus
P10649	Gstm1	5.10193	2.35104	0.0102837		1	8	8	26	Glutathione S-transferase Mu 1	Mus musculus
Q9D8U8	Snx5	5.09604	2.34938	0.00630848		1	5	12	46.8	Sorting nexin-5	Mus musculus
Q3UQA7	Selh	5.08966	2.34757	2.81382e-07	5.71115	2	14	14	12.8	Selenoprotein H	Mus musculus
Q91W96	Anapc4,D5Ertd249e	5.08756	2.34697	0.0117415		1	7	7	91.7	Anaphase-promoting complex subunit 4	Mus musculus
Q60597	Ogdh,Kiaa4192	5.05887	2.33882	3.1559e-29	136.564	104	1127	1726	116.4	2-oxoglutarate dehydrogenase, mitochondrial	Mus musculus
Q8BVE3	Atp6v1h	5.03659	2.33245	1.06524e-13	16.2642	5	41	45	55.9	V-type proton ATPase subunit H	Mus musculus
Q8CFE3	Rcor1,D12Wsu95e,Kiaa0071	5.03197	2.33112	0.00313297		1	8	8	52.7	REST corepressor 1	Mus musculus
Q7TNC4	Luc7l2	5.01269	2.32559	1.86051e-15	75.9084	17	210	225	46.6	Putative RNA-binding protein Luc7-like 2	Mus musculus
A2ATU0	Dhtkd1,Kiaa1630	5.00759	2.32412	4.05615e-06	72.429	9	64	81	102.8	Probable 2-oxoglutarate dehydrogenase E1 component DHKTD1, mitochondrial	Mus musculus
Q9ES00	Ube4b,Ufd2	4.99997	2.32192	0.00476899		1	8	8	133.3	Ubiquitin conjugation factor E4 B	Mus musculus
Q9QUR7	Pin1	4.99913	2.32168	1.70423e-07	31.9897	5	40	40	18.4	Peptidyl-prolyl cis-trans isomerase NIMA-interacting 1	Mus musculus
Q91V92	Acly	4.99804	2.32136	1.36824e-07	80.8451	12	114	129	119.7	ATP-citrate synthase	Mus musculus
Q8CBW3	Abi1,Ssh3bp1	4.99548	2.32062	0.000668153		1	9	9	52.3	Abl interactor 1	Mus musculus
O88545	Cops6,Csn6	4.9775	2.31542	0.000148034		1	9	9	35.9	COP9 signalosome complex subunit 6	Mus musculus
Q7TNC6	Kif26b	4.96949	2.3131	0.00194584		1	9	9	225.5	Kinesin-like protein KIF26B	Mus musculus
Q99LC3	Ndufa10	4.96596	2.31207	0.000373178	21.4899	2	15	15	40.6	NADH dehydrogenase [ubiquinone] 1 alpha subcomplex subunit 10, mitochondrial	Mus musculus
O88738	Birc6,Kiaa1289	4.93765	2.30382	0.00113	41.7861	2	17	17	532.2	Baculoviral IAP repeat-containing protein 6	Mus musculus
Q64512	Ptpn13,Ptp14	4.92659	2.30059	1.01712e-22	33.6384	14	118	118	270.3	Tyrosine-protein phosphatase non-receptor type 13	Mus musculus
O35129	Phb2,Bap,Bcap37,Rea	4.92298	2.29953	0.152079		1	6	12	33.3	Prohibitin-2	Mus musculus
Q9CR51	Atp6v1g1,Atp6g1	4.90816	2.29518	0.00340838		1	7	7	13.7	V-type proton ATPase subunit G 1	Mus musculus
Q6PDQ2	Chd4	4.89642	2.29173	3.18474e-28	63.5684	36	324	346	217.8	Chromodomain-helicase-DNA-binding protein 4	Mus musculus
P11499	Hsp90ab1,Hsp84,Hsp84-1,Hspcb	4.89569	2.29151	2.76807e-19	101.745	42	436	487	83.3	Heat shock protein HSP 90-beta	Mus musculus
Q03147	Cdk7,Cak,Cdkn7,Crk4,Mo15,Mpk-7	4.89192	2.2904	0.00078697		1	9	9	39	Cyclin-dependent kinase 7	Mus musculus
O35465	Fkbp8,Fkbp38,Sam11	4.89105	2.29015	1.7884e-06	38.5782	4	31	31	43.5	Peptidyl-prolyl cis-trans isomerase FKBP8	Mus musculus
Q61602	Gli3	4.86649	2.28288	0.0211327		1	8	8	171.7	Transcriptional activator GLI3	Mus musculus
Q3TRM4	Pnpla6,Nte	4.86242	2.28167	4.34991e-07	26.0889	4	30	30	149.5	Neuropathy target esterase	Mus musculus
Q9WTK5	Nfkb2	4.85449	2.27932	0.0029632		1	9	9	96.8	Nuclear factor NF-kappa-B p100 subunit	Mus musculus
P54276	Msh6,Gtmbp	4.83883	2.27466	0.000674765	18.6883	2	17	17	151.1	DNA mismatch repair protein Msh6	Mus musculus
Q9CPP6	Ndufa5	4.82132	2.26943	0.000892058	5.66334	2	14	14	13.4	NADH dehydrogenase [ubiquinone] 1 alpha subcomplex subunit 5	Mus musculus
Q3UIA2	Arhgap17	4.79066	2.26023	2.02746e-05	51.2557	5	41	49	92.2	Rho GTPase-activating protein 17	Mus musculus
P24547	Impdh2	4.78938	2.25984	0.0865762		1	6	6	55.8	Inosine-5'-monophosphate dehydrogenase 2	Mus musculus
P97823	Lypla1,Apt1,Pla1a	4.7707	2.2542	5.97462e-06	11.9402	2	14	14	24.7	Acyl-protein thioesterase 1	Mus musculus
Q8CID0	Csrp2bp	4.75615	2.2498	1.30167e-11	59.635	11	92	92	88.2	Cysteine-rich protein 2-binding protein	Mus musculus
P70188	Kifap3	4.75147	2.24837	0.0112505	61.9234	2	15	15	91.3	Kinesin-associated protein 3	Mus musculus
Q6P3A8	Bckdhb	4.74198	2.24549	0.000122072	15.819	1	18	18	42.9	2-oxoisovalerate dehydrogenase subunit beta, mitochondrial	Mus musculus
Q9ER88	Dap3,Mrps29	4.73811	2.24431	0.00665597		1	9	9	44.7	28S ribosomal protein S29, mitochondrial	Mus musculus
Q9CWW7	Cxxc1,Cgbp,Pccx1	4.73573	2.24359	0.000121132	49.79	4	29	29	76.2	CXXC-type zinc finger protein 1	Mus musculus
Q61024	Asns	4.72026	2.23887	0.000153838	67.6542	6	51	58	64.3	Asparagine synthetase [glutamine-hydrolyzing]	Mus musculus
Q8BQM8	Eml5	4.71967	2.23869	0.0403114		1	9	9	220.1	Echinoderm microtubule-associated protein-like 5	Mus musculus
Q99ME2	Wdr6	4.71526	2.23734	0.00410262	82.638	2	27	27	121.9	WD repeat-containing protein 6	Mus musculus
Q9DBN5	Lonp2	4.69951	2.23251	2.60685e-09	48.028	9	69	92	94.5	Lon protease homolog 2, peroxisomal	Mus musculus
Q9R061	Nubp2	4.69605	2.23145	7.9076e-06	28.1273	3	22	22	29.5	Cytosolic Fe-S cluster assembly factor NUBP2	Mus musculus
O35864	Cops5,Csn5,Jab1,Kic2	4.66405	2.22158	0.00170548		1	8	17	37.5	COP9 signalosome complex subunit 5	Mus musculus
Q9Z0X1	Aifm1,Aif,Pdcd8	4.66014	2.22037	1.86573e-06	42.7505	6	43	43	66.8	Apoptosis-inducing factor 1, mitochondrial	Mus musculus
Q6P5E4	Uggt1,Gt,Ugcgl1,Uggt,Ugt1,Ugtr	4.65216	2.2179	2.5874e-07	76.4575	9	79	88	176.4	UDP-glucose:glycoprotein glucosyltransferase 1	Mus musculus
Q61249	Igbp1,Pc52	4.62975	2.21093	0.00367708		1	9	16	39	Immunoglobulin-binding protein 1	Mus musculus
P33215	Nedd1,Nedd-1	4.62496	2.20944	7.30459e-05		1	9	9	71.3	Protein NEDD1	Mus musculus
Q64433	Hspe1	4.62169	2.20842	1.44788e-05	52.2292	5	46	54	11	10 kDa heat shock protein, mitochondrial	Mus musculus
P28660	Nckap1,Hem2,Kiaa0587,Nap1	4.61728	2.20704	5.1526e-07	49.1716	6	47	47	128.8	Nck-associated protein 1	Mus musculus
E9PVA8	Gcn1,Gcn1l1	4.60619	2.20357	2.53684e-14	40.4803	11	88	88	293	eIF-2-alpha kinase activator GCN1	Mus musculus
Q9JLQ2	Git2	4.5997	2.20154	0.000595211	105.578	10	85	85	78.8	ARF GTPase-activating protein GIT2	Mus musculus
Q64441	Cyp24a1,Cyp-24,Cyp24	4.57602	2.19409	0.0216197		1	9	9	59.5	1,25-dihydroxyvitamin D(3) 24-hydroxylase, mitochondrial	Mus musculus
P56391	Cox6b1,Cox6b	4.53706	2.18176	0.0363871		1	9	9	10.1	Cytochrome c oxidase subunit 6B1	Mus musculus
Q80TQ2	Cyld,Cyld1,Kiaa0849	4.51747	2.17551	1.71737e-05	92.3954	12	95	116	106.6	Ubiquitin carboxyl-terminal hydrolase CYLD	Mus musculus
P19788	Mgp,Mglap	4.51146	2.1736	9.63568e-05		1	9	9	12.4	Matrix Gla protein	Mus musculus
Q62073	Map3k7,Tak1	4.50299	2.17088	0.000251707	24.4052	2	18	18	64.2	Mitogen-activated protein kinase kinase kinase 7	Mus musculus
Q9DCS2		4.47541	2.16202	0.0376395	64.7982	2	14	14	22.7	Methyltransferase-like 26	Mus musculus
Q9DB15	Mrpl12,Rpml12	4.47479	2.16182	2.77241e-05	57.8496	5	35	35	21.7	39S ribosomal protein L12, mitochondrial	Mus musculus
Q8CGF1	Arhgap29	4.47074	2.16051	0.0393617		1	9	9	142.3	Rho GTPase-activating protein 29	Mus musculus
Q9JKX6	Nudt5	4.45523	2.1555	3.05373e-08	21.3916	4	33	33	24	ADP-sugar pyrophosphatase	Mus musculus
Q3UZP0	Marveld2,Mrvldc2,Tric	4.45369	2.155	0.00098102		1	9	9	63.7	MARVEL domain-containing protein 2	Mus musculus
Q9Z2I0	Letm1	4.44797	2.15315	1.37987e-06	12.4884	2	17	17	83	LETM1 and EF-hand domain-containing protein 1, mitochondrial	Mus musculus
A2AKB9	Dcaf10,Wdr32	4.44262	2.15141	0.0526284		1	7	7	61.6	DDB1- and CUL4-associated factor 10	Mus musculus
Q9D051	Pdhb	4.43924	2.15031	1.01096e-06	21.6833	4	30	30	38.9	Pyruvate dehydrogenase E1 component subunit beta, mitochondrial	Mus musculus
Q921G8	Tubgcp2,Gcp2	4.43487	2.14889	1.34633e-05	27.5968	3	22	22	103.2	Gamma-tubulin complex component 2	Mus musculus
Q02257	Jup	4.42298	2.14502	0.00101779	63.352	4	33	33	81.8	Junction plakoglobin	Mus musculus
A2ALU4	Shroom2,Apxl	4.42082	2.14431	2.95293e-05	42.0472	6	38	38	164.7	Protein Shroom2	Mus musculus
Q9CQ22	Lamtor1	4.41882	2.14366	0.0320412		1	8	8	17.7	Ragulator complex protein LAMTOR1	Mus musculus
Q01147	Creb1,Creb-1	4.40618	2.13953	0.0126494		1	9	9	36.7	Cyclic AMP-responsive element-binding protein 1	Mus musculus
Q7TMQ7	Wdr91	4.39935	2.13729	6.93047e-06	10.2219	2	17	17	83.4	WD repeat-containing protein 91	Mus musculus
Q9D855	Uqcrb	4.38387	2.1322	0.0555227		1	8	8	13.5	Cytochrome b-c1 complex subunit 7	Mus musculus
Q9CPV2	Anapc16,D10Ertd641e	4.37146	2.12812	0.000335814		1	9	9	11.7	Anaphase-promoting complex subunit 16	Mus musculus
Q8VDM1	Zgpat,Kiaa1847	4.35094	2.12133	0.00143048	39.0902	2	17	17	56.4	Zinc finger CCCH-type with G patch domain-containing protein	Mus musculus
Q9D8T7	Slirp	4.3437	2.11893	2.3113e-07	21.8316	1	18	18	12.6	SRA stem-loop-interacting RNA-binding protein, mitochondrial	Mus musculus
Q925I1	Atad3,Atad3a,Kiaa1273	4.33632	2.11647	2.6474e-26	49.4103	28	237	243	66.7	ATPase family AAA domain-containing protein 3	Mus musculus
Q9Z2E1	Mbd2	4.31667	2.10992	1.8301e-09	47.7332	8	66	72	43.5	Methyl-CpG-binding domain protein 2	Mus musculus
P50516	Atp6v1a,Atp6a1,Atp6a2,Atp6v1a1	4.31653	2.10987	0.000261757	45.1062	3	25	30	68.3	V-type proton ATPase catalytic subunit A	Mus musculus
Q6Y685	Tacc1	4.29734	2.10344	5.15366e-06	31.7466	3	26	31	84	Transforming acidic coiled-coil-containing protein 1	Mus musculus
Q922D8	Mthfd1	4.28746	2.10012	1.30167e-11	34.4493	8	73	73	101.2	C-1-tetrahydrofolate synthase, cytoplasmic	Mus musculus
Q61655	Ddx19a,Ddx19,Eif4a-rs1	4.26701	2.09322	9.72125e-12	37.2665	8	71	71	53.9	ATP-dependent RNA helicase DDX19A	Mus musculus
Q3TUF7	Yeats2,Kiaa1197	4.26015	2.0909	3.18474e-28	66.0122	37	319	340	148.9	YEATS domain-containing protein 2	Mus musculus
Q8K1C0	Angel2,D1Ertd396e,D1Ertd654e,MNCb-4273	4.25967	2.09074	0.000111563		1	9	9	62.4	Protein angel homolog 2	Mus musculus
P03930	Mtatp8,Atp8,mt-Atp8	4.25025	2.08755	0.0275987		1	9	9	7.8	ATP synthase protein 8	Mus musculus
Q9DCZ4	Apoo,Fam121b,Mic23,Mic26	4.24877	2.08705	0.020314		1	9	9	22.6	MICOS complex subunit Mic26	Mus musculus
Q922Q4	Pycr2	4.24505	2.08578	0.000331744	94.8571	6	67	67	33.7	Pyrroline-5-carboxylate reductase 2	Mus musculus
Q99N20	Brms1	4.23796	2.08337	0.00887024		1	9	9	28.2	Breast cancer metastasis-suppressor 1 homolog	Mus musculus
Q9JLZ3	Auh	4.22977	2.08058	0.0923239		1	7	7	33.4	Methylglutaconyl-CoA hydratase, mitochondrial	Mus musculus
Q8R127	Sccpdh	4.21285	2.07479	0.0146464	61.5015	2	16	23	47.1	Saccharopine dehydrogenase-like oxidoreductase	Mus musculus
P59114	Pcif1	4.21066	2.07405	0.000142834	49.4298	4	30	30	80.5	Phosphorylated CTD-interacting factor 1	Mus musculus
Q922M7		4.20888	2.07344	0.00628991		1	7	7	26	Ashwin	Mus musculus
Q9CQX8	Mrps36	4.19315	2.06804	9.14046e-05	134.908	11	153	161	11.1	28S ribosomal protein S36, mitochondrial	Mus musculus
Q922W5	Pycr1	4.19173	2.06755	0.104391	63.361	2	8	8	32.4	Pyrroline-5-carboxylate reductase 1, mitochondrial	Mus musculus
Q9EP89	Lactb,Lact1	4.17445	2.06159	4.97756e-08	23.867	3	27	34	60.7	Serine beta-lactamase-like protein LACTB, mitochondrial	Mus musculus
Q9R190	Mta2,Mta1l1	4.16213	2.05732	3.26972e-17	80.9911	29	247	264	75	Metastasis-associated protein MTA2	Mus musculus
Q91VS8	Farp2,Kiaa0793	4.15775	2.0558	3.54189e-09	33.5418	4	36	36	121.3	FERM, RhoGEF and pleckstrin domain-containing protein 2	Mus musculus
Q9EPJ9	Arfgap1,Arf1gap	4.15068	2.05335	0.000195117	38.0543	3	23	23	45.3	ADP-ribosylation factor GTPase-activating protein 1	Mus musculus
Q9WV95	Phlda3,Tih1	4.14356	2.05087	0.0156929	70.7759	2	17	17	13.7	Pleckstrin homology-like domain family A member 3	Mus musculus
Q9R1P1	Psmb3	4.1411	2.05001	0.0611863		1	9	9	23	Proteasome subunit beta type-3	Mus musculus
Q8VBT0	Tmx1,Txndc,Txndc1	4.12963	2.04601	0.00819341		1	7	7	31.4	Thioredoxin-related transmembrane protein 1	Mus musculus
P03975	Iap	4.1143	2.04065	1.437e-09	59.2449	10	86	86	62.7	IgE-binding protein	Mus musculus
P61082	Ube2m,Ubc-rs2,Ubc12	4.08897	2.03174	0.00961445		1	9	9	20.9	NEDD8-conjugating enzyme Ubc12	Mus musculus
Q8R3C1		4.07678	2.02743	0.00559594		1	9	9	64.1	Uncharacterized protein C2orf42 homolog	Mus musculus
Q9CWJ9	Atic,Purh	4.07044	2.02518	0.00431146	51.3854	4	27	27	64.2	Bifunctional purine biosynthesis protein PURH	Mus musculus
P97452	Bop1,Kiaa0124	4.06988	2.02499	6.54835e-05	67.4897	5	40	40	82.5	Ribosome biogenesis protein BOP1	Mus musculus
Q9CQ21	Mcts2	4.03052	2.01097	0.000854116		1	7	7	20.4	Malignant T-cell-amplified sequence 2	Mus musculus
Q8BX09	Rbbp5	4.03003	2.01079	4.48988e-06	16.9681	1	18	18	59.1	Retinoblastoma-binding protein 5	Mus musculus
Q91VR2	Atp5c1	4.0144	2.00518	4.11726e-09	47.2784	9	75	90	32.9	ATP synthase subunit gamma, mitochondrial	Mus musculus
P10922	H1f0,H1fv	3.99605	1.99858	0.000199378	151.649	16	174	181	20.9	Histone H1.0	Mus musculus
Q9CQ48	Nudcd2,D11Ertd603e	3.96776	1.98832	0.0140631	81.2601	2	16	16	17.7	NudC domain-containing protein 2	Mus musculus
Q5SXA9	Wwc1,Kiaa0869	3.96278	1.98651	0.00889694		1	8	8	124.1	Protein KIBRA	Mus musculus
Q8CBE3	Wdr37,Kiaa0982	3.96222	1.98631	5.98798e-09	90.8112	19	174	182	55	WD repeat-containing protein 37	Mus musculus
P16460	Ass1,Ass	3.93729	1.9772	7.21139e-08	67.1327	10	95	108	46.6	Argininosuccinate synthase	Mus musculus
Q61474	Msi1,Msi1h	3.93197	1.97525	2.65329e-08	50.0081	7	69	90	39.1	RNA-binding protein Musashi homolog 1	Mus musculus
Q91VM9	Ppa2	3.92885	1.97411	0.00171102		1	9	9	38.1	Inorganic pyrophosphatase 2, mitochondrial	Mus musculus
Q9CQV8	Ywhab	3.92759	1.97364	2.24767e-07	33.6313	4	45	45	28.1	14-3-3 protein beta/alpha	Mus musculus
P51660	Hsd17b4,Edh17b4	3.92173	1.97149	0.0486023		1	7	7	79.5	Peroxisomal multifunctional enzyme type 2	Mus musculus
O55143	Atp2a2	3.91375	1.96855	6.31223e-08	38.8975	6	52	59	114.9	Sarcoplasmic/endoplasmic reticulum calcium ATPase 2	Mus musculus
Q6PHQ8	Naa35,Egap,Mak10	3.90894	1.96678	2.06138e-06	16.5386	2	16	22	83.3	N-alpha-acetyltransferase 35, NatC auxiliary subunit	Mus musculus
Q9JHW4	Eefsec,Selb	3.90032	1.96359	8.98982e-09	41.4949	8	67	67	63.5	Selenocysteine-specific elongation factor	Mus musculus
Q9R0Q7	Ptges3,Sid3177,Tebp	3.89719	1.96243	0.015566	81.3623	2	18	18	18.7	Prostaglandin E synthase 3	Mus musculus
Q99L90	Mcrs1,Msp58	3.8943	1.96137	3.43211e-08	72.0742	11	100	100	51.7	Microspherule protein 1	Mus musculus
Q9Z127	Slc7a5,Lat1	3.88868	1.95928	0.0026211	49.922	2	17	17	55.9	Large neutral amino acids transporter small subunit 1	Mus musculus
Q8BKZ9	Pdhx	3.88828	1.95913	0.00270356	88.2695	4	30	30	54	Pyruvate dehydrogenase protein X component, mitochondrial	Mus musculus
Q9D3N8	Grtp1,Tbc1d6	3.86302	1.94973	0.0192532		1	8	8	40.6	Growth hormone-regulated TBC protein 1	Mus musculus
Q9Z2M7	Pmm2	3.84744	1.9439	0.00314703		1	9	18	27.7	Phosphomannomutase 2	Mus musculus
P97370	Atp1b3	3.83154	1.93793	0.00364753	51.6078	2	16	16	31.8	Sodium/potassium-transporting ATPase subunit beta-3	Mus musculus
Q99LX0	Park7	3.8307	1.93761	0.0577777	108.709	3	24	27	20	Protein DJ-1	Mus musculus
Q8VEH3	Arl8a,Arl10b,Gie2	3.83004	1.93736	0.0126446		1	8	8	21.4	ADP-ribosylation factor-like protein 8A	Mus musculus
Q58FA4	E2f8	3.82241	1.93448	0.000140367		1	9	9	93.3	Transcription factor E2F8	Mus musculus
Q8VE73	Cul7,Kiaa0076	3.82023	1.93366	9.80478e-06	77.1912	12	88	88	192.3	Cullin-7	Mus musculus
Q9ES97	Rtn3	3.80471	1.92778	0.0174249	71.181	2	18	18	103.9	Reticulon-3	Mus musculus
Q8VDN2	Atp1a1	3.79103	1.92259	7.63081e-12	57.6221	12	120	127	113	Sodium/potassium-transporting ATPase subunit alpha-1	Mus musculus
A2APV2	Fmnl2,Kiaa1902,Man	3.78867	1.92169	1.2648e-06	50.5942	9	54	60	123.1	Formin-like protein 2	Mus musculus
P68372	Tubb4b,Tubb2c	3.77206	1.91535	0.00141421		1	9	17	49.8	Tubulin beta-4B chain	Mus musculus
Q9DCT2	Ndufs3	3.7697	1.91445	0.00312785		1	9	16	30.1	NADH dehydrogenase [ubiquinone] iron-sulfur protein 3, mitochondrial	Mus musculus
Q7TPM9	Mtmr10	3.76476	1.91256	0.0181866		1	9	16	88.2	Myotubularin-related protein 10	Mus musculus
Q9Z110	Aldh18a1,P5cs,Pycs	3.75723	1.90967	3.09996e-07	62.0516	9	75	92	87.3	Delta-1-pyrroline-5-carboxylate synthase	Mus musculus
Q9Z2I9	Sucla2	3.74733	1.90586	5.09573e-06	62.3559	6	47	47	50.1	Succinate--CoA ligase [ADP-forming] subunit beta, mitochondrial	Mus musculus
Q0KL02	Trio	3.74663	1.90559	0.000403266		1	8	8	347.9	Triple functional domain protein	Mus musculus
P62814	Atp6v1b2,Atp6b2,Vat2	3.7417	1.9037	0.0011202	57.2414	4	29	29	56.6	V-type proton ATPase subunit B, brain isoform	Mus musculus
P19324	Serpinh1,Cbp1,Hsp47	3.7404	1.90319	3.38615e-13	93.5781	30	284	320	46.5	Serpin H1	Mus musculus
Q91YL3	Uckl1,Urkl1	3.73836	1.9024	1.59096e-10	145.777	35	400	493	60.8	Uridine-cytidine kinase-like 1	Mus musculus
Q8K245	Uvrag,Uvrag1	3.738	1.90227	0.00161827		1	9	9	77.5	UV radiation resistance associated protein	Mus musculus
Q8VDR9	Dock6,Kiaa1395	3.73695	1.90186	0.00235962	48.3297	2	14	14	233.3	Dedicator of cytokinesis protein 6	Mus musculus
P62046	Lrch1,Chdc1,Kiaa1016	3.73533	1.90124	0.00381139	33.9889	2	18	18	79.1	Leucine-rich repeat and calponin homology domain-containing protein 1	Mus musculus
A2A6Q5	Cdc27	3.72829	1.89851	0.00510003	80.0398	4	33	33	91.8	Cell division cycle protein 27 homolog	Mus musculus
Q8BGS1	Epb41l5,Epb4.1l5,Kiaa1548	3.72252	1.89628	0.000163548	68.0213	5	43	48	81.6	Band 4.1-like protein 5	Mus musculus
P30416	Fkbp4,Fkpb52	3.71968	1.89518	1.73455e-06	91.5026	14	126	133	51.6	Peptidyl-prolyl cis-trans isomerase FKBP4	Mus musculus
Q9WVM3	Anapc7,Apc7	3.71705	1.89416	9.42143e-07	10.2179	1	18	26	63	Anaphase-promoting complex subunit 7	Mus musculus
Q640M1	Utp14a,JsdX,Kiaa0266	3.70829	1.89075	2.60046e-14	57.0394	16	137	146	87.3	U3 small nucleolar RNA-associated protein 14 homolog A	Mus musculus
Q8K1X1	Wdr11,Brwd2,Kiaa1351	3.70193	1.88828	8.3023e-06	61.4428	5	50	50	135.9	WD repeat-containing protein 11	Mus musculus
Q9CZ04	Cops7a,Csn7a	3.69884	1.88707	3.83032e-05	18.8789	2	18	18	30.2	COP9 signalosome complex subunit 7a	Mus musculus
Q8VDW0	Ddx39a,Ddx39	3.69776	1.88665	0.0476954		1	9	9	49.1	ATP-dependent RNA helicase DDX39A	Mus musculus
Q91VD9	Ndufs1	3.6934	1.88495	1.07291e-05	46.0153	5	42	42	79.8	NADH-ubiquinone oxidoreductase 75 kDa subunit, mitochondrial	Mus musculus
Q9WVP6	Papolb,Papt,Tpap	3.69303	1.88481	0.00213633		1	9	9	72.2	Poly(A) polymerase beta	Mus musculus
Q9WV60	Gsk3b	3.68939	1.88338	0.000452598	44.754	3	26	26	46.7	Glycogen synthase kinase-3 beta	Mus musculus
A2AM29	Mllt3,Af9	3.68855	1.88305	0.0411401		1	7	7	63.4	Protein AF-9	Mus musculus
Q63918	Sdpr,Sdr	3.68147	1.88028	3.38366e-07	66.1923	8	73	73	46.8	Serum deprivation-response protein	Mus musculus
Q02248	Ctnnb1,Catnb	3.68075	1.88	0.00178324	15.7452	2	17	17	85.5	Catenin beta-1	Mus musculus
O70404	Vamp8	3.65782	1.87098	0.0151384	49.2179	2	15	15	11.5	Vesicle-associated membrane protein 8	Mus musculus
Q5PRE5	Proser1	3.65446	1.86966	0.0010373	33.9903	3	21	21	92	Proline and serine-rich protein 1	Mus musculus
Q922Q1	Marc2,Mg87,Mosc2	3.65015	1.86796	0.0176134	86.2167	2	17	25	38.2	Mitochondrial amidoxime reducing component 2	Mus musculus
Q99K41	Emilin1	3.64032	1.86407	0.00647484	76.284	4	30	30	107.6	EMILIN-1	Mus musculus
P70302	Stim1,Sim	3.63494	1.86193	0.025077	39.0076	2	14	14	77.6	Stromal interaction molecule 1	Mus musculus
Q9JHD2	Kat2a,Gcn5l2	3.63306	1.86119	0.000137343	69.5743	6	49	49	93.4	Histone acetyltransferase KAT2A	Mus musculus
Q80UW5	Cdc42bpg	3.63091	1.86033	1.26184e-05	49.0816	4	31	31	172.1	Serine/threonine-protein kinase MRCK gamma	Mus musculus
Q9WUM5	Suclg1	3.62681	1.8587	1.18107e-06	62.0833	6	58	58	36.2	Succinyl-CoA ligase [ADP/GDP-forming] subunit alpha, mitochondrial	Mus musculus
Q9QZ11	Exo1	3.62664	1.85864	0.23166		1	8	8	92	Exonuclease 1	Mus musculus
P26638	Sars,Sars1,Sers	3.62657	1.8586	0.000144669	55.996	5	39	39	58.4	Serine--tRNA ligase, cytoplasmic	Mus musculus
Q8CI61	Bag4,Sodd	3.62615	1.85844	5.1772e-07	42.3162	4	33	33	49.1	BAG family molecular chaperone regulator 4	Mus musculus
Q9D2G2	Dlst	3.61946	1.85578	0.0504636	261.898	15	135	149	49	Dihydrolipoyllysine-residue succinyltransferase component of 2-oxoglutarate dehydrogenase complex, mitochondrial	Mus musculus
Q61191	Hcfc1	3.61906	1.85561	5.24912e-15	105.501	39	356	372	210.4	Host cell factor 1	Mus musculus
Q8CCJ9	Phf20l1	3.61886	1.85554	1.1041e-06	108.214	17	140	147	113.9	PHD finger protein 20-like protein 1	Mus musculus
Q3V3R1	Mthfd1l,Fthfsdc1	3.61872	1.85548	9.04361e-16	29.8308	8	89	89	105.7	Monofunctional C1-tetrahydrofolate synthase, mitochondrial	Mus musculus
P10852	Slc3a2,Mdu1	3.61765	1.85505	1.86573e-06	22.7609	4	35	35	58.3	4F2 cell-surface antigen heavy chain	Mus musculus
Q99JP4	Cdc26	3.60994	1.85197	0.000251035	23.5681	2	16	16	9.8	Anaphase-promoting complex subunit CDC26	Mus musculus
Q9D4H4	Amotl1	3.60625	1.8505	2.03677e-10	55.9675	12	100	106	108	Angiomotin-like protein 1	Mus musculus
Q8BK64	Ahsa1	3.59947	1.84778	1.09286e-05	63.2246	9	64	64	38.1	Activator of 90 kDa heat shock protein ATPase homolog 1	Mus musculus
P20357	Map2,Mtap2	3.56734	1.83485	1.32364e-06	32.7442	4	36	36	199.1	Microtubule-associated protein 2	Mus musculus
Q9Z2Q6	Sept5,Pnutl1	3.55939	1.83163	0.116585		1	8	8	42.7	Septin-5	Mus musculus
P47802	Mtx1,Mtx,Mtxn	3.55101	1.82823	0.00525857		1	9	9	35.6	Metaxin-1	Mus musculus
Q8K1M6	Dnm1l,Drp1	3.54769	1.82688	1.06721e-05	36.2815	4	32	32	82.7	Dynamin-1-like protein	Mus musculus
Q5EG47	Prkaa1	3.5405	1.82396	0.0235894		1	9	9	63.9	5'-AMP-activated protein kinase catalytic subunit alpha-1	Mus musculus
Q91VT4	Cbr4	3.53928	1.82345	0.000524614	41.4076	4	24	27	25.4	Carbonyl reductase family member 4	Mus musculus
Q8VBT9	Aspscr1,Tug	3.53651	1.82233	7.06994e-05	39.1835	3	26	26	59.8	Tether containing UBX domain for GLUT4	Mus musculus
O08785	Clock	3.52909	1.8193	0.0266859	110.27	2	15	15	96.4	Circadian locomoter output cycles protein kaput	Mus musculus
Q61335	Bcap31,Bap31	3.52641	1.8182	2.51332e-07	58.0785	7	75	75	28	B-cell receptor-associated protein 31	Mus musculus
Q99N96	Mrpl1	3.50814	1.81071	0.10879	45.9218	2	12	12	37.6	39S ribosomal protein L1, mitochondrial	Mus musculus
Q8K2K6	Agfg1,Hrb,Rip	3.50365	1.80886	0.00265068	6.91169	2	15	15	58	Arf-GAP domain and FG repeat-containing protein 1	Mus musculus
Q91XP5	Glra3	3.49153	1.80386	0.00365996		1	9	9	53.7	Glycine receptor subunit alpha-3	Mus musculus
Q9JM96	Cdc42ep4,Borg4,Cep4	3.4891	1.80285	0.01659		1	8	8	37.9	Cdc42 effector protein 4	Mus musculus
Q62425	Ndufa4	3.46256	1.79184	0.000597212	106.532	7	71	71	9.3	Cytochrome c oxidase subunit NDUFA4	Mus musculus
Q9CZG9	Pdzd11,Pdzk11	3.46156	1.79142	2.4612e-05		1	9	9	16.2	PDZ domain-containing protein 11	Mus musculus
Q9CPR1	Rwdd4,Rwdd4a	3.461	1.79119	0.05618		1	9	9	21.1	RWD domain-containing protein 4	Mus musculus
P43247	Msh2	3.46068	1.79106	0.000142834	65.7933	5	37	37	104.2	DNA mismatch repair protein Msh2	Mus musculus
P35564	Canx	3.44952	1.78639	0.0358383		1	9	9	67.3	Calnexin	Mus musculus
Q8C7D2	Crbn	3.44592	1.78489	0.0132526		1	9	9	50.9	Protein cereblon	Mus musculus
Q9Z2I8	Suclg2	3.43614	1.78079	4.32108e-07	68.3201	9	77	81	46.8	Succinyl-CoA ligase [GDP-forming] subunit beta, mitochondrial	Mus musculus
Q8R5M2	Wnt9a,Wnt14	3.43352	1.77969	0.00722508		1	9	9	40.4	Protein Wnt-9a	Mus musculus
Q60973	Rbbp7,Rbap46	3.42846	1.77756	0.0281245	126.603	3	34	42	47.8	Histone-binding protein RBBP7	Mus musculus
Q9QZ88	Vps29	3.42384	1.77561	0.128965		1	5	5	20.5	Vacuolar protein sorting-associated protein 29	Mus musculus
Q69Z23	Dnah17,Dnahc17,Kiaa3028	3.41074	1.77009	0.00472682		1	9	9	511.6	Dynein heavy chain 17, axonemal	Mus musculus
Q04735	Cdk16,Crk5,Pctaire1,Pctk1	3.40786	1.76887	2.20127e-19	82.003	31	314	314	55.9	Cyclin-dependent kinase 16	Mus musculus
Q5F226	Fat2,Fath2,Kiaa0811	3.40423	1.76733	0.0661418		1	9	9	480.1	Protocadherin Fat 2	Mus musculus
Q9DCF9	Ssr3	3.39894	1.76508	0.0368735	40.908	2	18	18	21.1	Translocon-associated protein subunit gamma	Mus musculus
Q8BU88	Mrpl22	3.39863	1.76495	5.74559e-08	18.3221	2	18	18	23.8	39S ribosomal protein L22, mitochondrial	Mus musculus
Q9D6N5	Drap1	3.39801	1.76469	0.000544921		1	7	7	22.3	Dr1-associated corepressor	Mus musculus
Q68FL6	Mars	3.39238	1.7623	2.32066e-10	54.8211	12	96	96	101.4	Methionine--tRNA ligase, cytoplasmic	Mus musculus
Q9ERR7	Sep15	3.38541	1.75933	8.47484e-06	67.842	6	62	62	17.7	15 kDa selenoprotein	Mus musculus
P47738	Aldh2,Ahd-1,Ahd1	3.38471	1.75903	2.73909e-09	70.3606	13	120	126	56.5	Aldehyde dehydrogenase, mitochondrial	Mus musculus
O70333	Cript	3.38236	1.75803	0.00883369		1	9	9	11.3	Cysteine-rich PDZ-binding protein	Mus musculus
Q99K51	Pls3	3.37918	1.75668	0.000130344	67.6896	5	40	40	70.7	Plastin-3	Mus musculus
Q9D9Z5	Dda1	3.36967	1.75261	0.00482822	50.6424	2	18	18	11.8	DET1- and DDB1-associated protein 1	Mus musculus
O08788	Dctn1	3.36799	1.75189	1.63526e-12	41.76	9	79	79	141.7	Dynactin subunit 1	Mus musculus
Q91WG3	Trub2	3.35567	1.7466	0.000781064	50.9506	3	25	25	36.8	Probable tRNA pseudouridine synthase 2	Mus musculus
Q791V5	Mtch2	3.35551	1.74653	0.0298822		1	9	9	33.5	Mitochondrial carrier homolog 2	Mus musculus
Q8BHC4	Dcakd	3.35493	1.74628	0.187573		1	5	5	26.5	Dephospho-CoA kinase domain-containing protein	Mus musculus
Q8CES0	Naa30,Mak3,Nat12	3.35451	1.7461	6.96612e-06	30.4919	3	26	26	39.4	N-alpha-acetyltransferase 30	Mus musculus
Q9CQZ6	Ndufb3	3.34955	1.74397	0.113722		1	8	8	11.7	NADH dehydrogenase [ubiquinone] 1 beta subcomplex subunit 3	Mus musculus
Q8K1E0	Stx5,Stx5a	3.34756	1.74311	0.245495		1	6	6	39.7	Syntaxin-5	Mus musculus
P48193	Epb41,Epb4.1,Kiaa4056	3.33947	1.73962	1.3091e-06	99.9214	13	124	124	95.9	Protein 4.1	Mus musculus
O88448	Klc2	3.33849	1.7392	0.0173867		1	9	9	66.7	Kinesin light chain 2	Mus musculus
Q91X20	Ash2l	3.32364	1.73276	4.91562e-05	19.8731	2	16	21	68.3	Set1/Ash2 histone methyltransferase complex subunit ASH2	Mus musculus
Q9D0R2	Tars	3.31483	1.72894	7.95434e-05	49.4701	6	46	54	83.4	Threonine--tRNA ligase, cytoplasmic	Mus musculus
Q3TEW6	Mpzl1,Pzr	3.31386	1.72851	0.0546237		1	7	7	29.5	Myelin protein zero-like protein 1	Mus musculus
Q6PB66	Lrpprc,Lrp130	3.31311	1.72818	2.94127e-14	48.195	15	118	118	156.6	Leucine-rich PPR motif-containing protein, mitochondrial	Mus musculus
Q9QYJ0	Dnaja2	3.30871	1.72627	0.0211327	97.6651	3	25	25	45.7	DnaJ homolog subfamily A member 2	Mus musculus
Q922Y1	Ubxn1,D19Ertd721e,Saks1	3.29749	1.72137	0.000854116	52.2691	3	21	21	33.6	UBX domain-containing protein 1	Mus musculus
Q9Z2D8	Mbd3	3.29367	1.7197	0.000416481	73.3737	7	50	56	32.2	Methyl-CpG-binding domain protein 3	Mus musculus
Q5SQF8	Sap30l	3.28888	1.7176	0.00271746	22.7674	2	16	16	20.7	Histone deacetylase complex subunit SAP30L	Mus musculus
Q61425	Hadh,Hadhsc,Mschad,Schad	3.27702	1.71239	1.01754e-05	22.58	3	24	24	34.5	Hydroxyacyl-coenzyme A dehydrogenase, mitochondrial	Mus musculus
O70566	Diaph2,Diap2	3.27521	1.71159	0.000248733	50.2061	4	29	37	124.9	Protein diaphanous homolog 2	Mus musculus
Q8BJZ4	Mrps35	3.27511	1.71154	0.000705298	50.3555	3	21	21	36	28S ribosomal protein S35, mitochondrial	Mus musculus
Q62261	Sptbn1,Elf,Spnb-2,Spnb2,Sptb2	3.27306	1.71064	0.00190361		1	9	9	274.2	Spectrin beta chain, non-erythrocytic 1	Mus musculus
Q8C5R2	Proser2	3.27082	1.70965	0.00319517		1	9	17	50.4	Proline and serine-rich protein 2	Mus musculus
Q99PT1	Arhgdia,C87222,Gdi1	3.26715	1.70803	0.0404328		1	9	9	23.4	Rho GDP-dissociation inhibitor 1	Mus musculus
Q8VD75	Hip1,Kiaa4113	3.26134	1.70547	0.00662939		1	9	9	115.2	Huntingtin-interacting protein 1	Mus musculus
Q9QXD8	Limd1	3.26128	1.70544	0.0120066		1	9	9	71.4	LIM domain-containing protein 1	Mus musculus
Q3UCQ1	Foxk2,Ilf1	3.25575	1.70299	0.00659546	84.9737	3	27	27	68.4	Forkhead box protein K2	Mus musculus
Q9CQN1	Trap1,Hsp75	3.25278	1.70167	0.00235962	58.3869	3	27	41	80.2	Heat shock protein 75 kDa, mitochondrial	Mus musculus
Q9DCT6	Bap18	3.24972	1.70031	0.0189589	70.8708	2	18	18	18	Chromatin complexes subunit BAP18	Mus musculus
Q02053	Uba1,Sbx,Ube1,Ube1ax,Ube1x	3.23294	1.69285	1.45163e-06	57.9814	9	65	65	117.8	Ubiquitin-like modifier-activating enzyme 1	Mus musculus
Q9CPV3	Mrpl42,D10Ertd322e,Mrps32	3.22777	1.69054	0.135966		1	9	9	16.5	39S ribosomal protein L42, mitochondrial	Mus musculus
P34022	Ranbp1,Htf9-a,Htf9a	3.22559	1.68956	0.0151432		1	9	9	23.6	Ran-specific GTPase-activating protein	Mus musculus
Q8R1A4	Dock7,Gm430,Kiaa1771	3.21537	1.68498	1.02915e-19	82.3195	38	321	371	241.4	Dedicator of cytokinesis protein 7	Mus musculus
Q3UVG3	Fam91a1,D15Ertd621e,Kiaa0493	3.2117	1.68334	1.59096e-10	74.9078	17	153	162	93.5	Protein FAM91A1	Mus musculus
P32921	Wars,Wrs	3.21059	1.68284	1.11506e-06	41.7313	9	64	72	54.4	Tryptophan--tRNA ligase, cytoplasmic	Mus musculus
Q0GNC1	Inf2	3.20671	1.68109	0.00201307	34.556	4	27	27	138.6	Inverted formin-2	Mus musculus
Q9D6K8	Fundc2,Hcbp6	3.19884	1.67755	4.82365e-05	30.4498	2	27	27	16.6	FUN14 domain-containing protein 2	Mus musculus
P70296	Pebp1,Pbp,Pebp	3.19509	1.67586	0.0273473		1	9	9	20.8	Phosphatidylethanolamine-binding protein 1	Mus musculus
Q8CH18	Ccar1,Carp1	3.19386	1.6753	1.13587e-05	58.1247	5	44	51	132.1	Cell division cycle and apoptosis regulator protein 1	Mus musculus
Q78PY7	Snd1	3.19019	1.67364	3.35264e-19	70.0172	30	287	292	102.1	Staphylococcal nuclease domain-containing protein 1	Mus musculus
P58462	Foxp1	3.18163	1.66977	0.0129062		1	9	15	78.8	Forkhead box protein P1	Mus musculus
P70288	Hdac2,Yy1bp	3.17995	1.669	0.000821865	85.2032	7	56	63	55.3	Histone deacetylase 2	Mus musculus
Q9EQ06	Hsd17b11,Dhrs8,Pan1b	3.17624	1.66732	0.00637998		1	9	9	32.9	Estradiol 17-beta-dehydrogenase 11	Mus musculus
Q91WM1	Strbp,Spnr	3.1725	1.66562	0.120367	60.3334	2	8	8	73.7	Spermatid perinuclear RNA-binding protein	Mus musculus
P51954	Nek1	3.17122	1.66504	7.67148e-08	92.3225	16	125	125	136.7	Serine/threonine-protein kinase Nek1	Mus musculus
Q14C51	Ptcd3	3.16653	1.6629	1.17257e-05	23.3651	2	18	18	77.8	Pentatricopeptide repeat domain-containing protein 3, mitochondrial	Mus musculus
Q8BGZ4	Cdc23,Anapc8	3.15591	1.65806	0.000491688	69.7017	6	46	46	68.6	Cell division cycle protein 23 homolog	Mus musculus
Q8BWD8	Cdk19,Cdc2l6,Kiaa1028	3.1497	1.65522	0.0447197		1	9	9	56.6	Cyclin-dependent kinase 19	Mus musculus
Q8C6G1		3.13835	1.65001	0.145521		1	9	9	28.2	Protein C21orf2 homolog	Mus musculus
P68037	Ube2l3,Ubce7	3.13808	1.64988	2.18456e-05	19.9448	2	18	18	17.9	Ubiquitin-conjugating enzyme E2 L3	Mus musculus
Q6A026	Pds5a,Kiaa0648	3.13709	1.64943	0.00267485		1	8	8	150.3	Sister chromatid cohesion protein PDS5 homolog A	Mus musculus
Q9D8X1	Cutc	3.13556	1.64873	0.0134023		1	9	9	29	Copper homeostasis protein cutC homolog	Mus musculus
Q60864	Stip1	3.13529	1.6486	8.32093e-14	67.799	19	189	195	62.6	Stress-induced-phosphoprotein 1	Mus musculus
Q9D1G1	Rab1b	3.13375	1.64789	0.12687	45.1841	3	11	11	22.2	Ras-related protein Rab-1B	Mus musculus
P63038	Hspd1,Hsp60	3.13161	1.64691	2.5149e-13	117.781	45	413	462	61	60 kDa heat shock protein, mitochondrial	Mus musculus
P51859	Hdgf,Tdrm1	3.13008	1.6462	0.00328445	52.5229	3	32	32	26.3	Hepatoma-derived growth factor	Mus musculus
Q61749	Eif2b4,Eif2b,Eif2bd,Jgr1a	3.12622	1.64442	0.07887		1	6	6	57.6	Translation initiation factor eIF-2B subunit delta	Mus musculus
Q3UQS2	Lsmem1,Gm889	3.12155	1.64226	0.0481555		1	9	9	14.2	Leucine-rich single-pass membrane protein 1	Mus musculus
Q8BGV7	Kctd13,Poldip1	3.1151	1.63928	0.019081	60.0283	3	24	24	36.4	BTB/POZ domain-containing adapter for CUL3-mediated RhoA degradation protein 1	Mus musculus
Q922H9	Znf330,Noa36,Zfp330	3.08549	1.6255	0.0268929		1	7	7	35.6	Zinc finger protein 330	Mus musculus
P62259	Ywhae	3.08229	1.624	0.00160476	76.8796	4	45	45	29.2	14-3-3 protein epsilon	Mus musculus
P57759	Erp29	3.08115	1.62347	0.00155356	15.4471	2	16	16	28.8	Endoplasmic reticulum resident protein 29	Mus musculus
Q8BP27	Sfr1,Mei5,Meir5	3.08037	1.6231	0.0887903		1	9	9	35.2	Swi5-dependent recombination DNA repair protein 1 homolog	Mus musculus
Q64514	Tpp2	3.0773	1.62167	8.26547e-05	22.3619	2	18	18	139.9	Tripeptidyl-peptidase 2	Mus musculus
Q8CEI1	Bola3	3.07343	1.61985	0.138623		1	9	9	12.2	BolA-like protein 3	Mus musculus
Q9D2R8	Mrps33,Gdap3	3.07265	1.61948	0.00362442	34.9712	2	18	18	12.5	28S ribosomal protein S33, mitochondrial	Mus musculus
Q61712	Dnajc1,Dnajl1,Mtj1	3.07134	1.61887	0.00333693	48.8549	2	16	16	63.9	DnaJ homolog subfamily C member 1	Mus musculus
Q61235	Sntb2,Snt2b2	3.06821	1.6174	0.0108566	116.333	6	47	47	56.4	Beta-2-syntrophin	Mus musculus
P07724	Alb,Alb-1,Alb1	3.06666	1.61667	0.00108395		1	9	9	68.7	Serum albumin	Mus musculus
Q8BIH0	Sap130	3.06033	1.61369	1.24111e-14	66.042	13	168	186	111.2	Histone deacetylase complex subunit SAP130	Mus musculus
Q9CZ83	Mrpl55	3.05185	1.60968	0.00853453		1	9	9	15.1	39S ribosomal protein L55, mitochondrial	Mus musculus
O54790	Mafg	3.04873	1.60821	0.000123476	76.5614	6	54	54	17.9	Transcription factor MafG	Mus musculus
F8VQB6	Myo10	3.04482	1.60636	0.00078697	82.4032	7	54	54	237.3	Unconventional myosin-X	Mus musculus
Q3TX08	Trmt1,D8Ertd812e	3.0448	1.60635	0.00295842		1	9	9	72.3	tRNA (guanine(26)-N(2))-dimethyltransferase	Mus musculus
Q99LI8	Hgs,Hrs	3.03882	1.60351	0.0232664		1	8	8	86	Hepatocyte growth factor-regulated tyrosine kinase substrate	Mus musculus
Q8VD12	Znf385a,Hzf,Zfp385a	3.03827	1.60325	2.89767e-05	55.7623	3	35	35	40.4	Zinc finger protein 385A	Mus musculus
Q9D1P4	Chordc1,Chp1,Morgana	3.03521	1.6018	0.21482		1	8	8	37.4	Cysteine and histidine-rich domain-containing protein 1	Mus musculus
O70311	Nmt2	3.03234	1.60043	2.64381e-09	44.8643	8	64	72	60.5	Glycylpeptide N-tetradecanoyltransferase 2	Mus musculus
P98083	Shc1,Shc,ShcA	3.0305	1.59956	0.169717		1	8	8	62.6	SHC-transforming protein 1	Mus musculus
Q9R0N0	Galk1,Galk,Glk	3.0297	1.59918	0.0196302		1	9	9	42.3	Galactokinase	Mus musculus
Q8K297	Glt25d1	3.02879	1.59874	0.00220597		1	9	9	71.1	Procollagen galactosyltransferase 1	Mus musculus
P49586	Pcyt1a,Ctpct,Pcyt1	3.02517	1.59701	0.0877099		1	9	9	41.7	Choline-phosphate cytidylyltransferase A	Mus musculus
Q99KI0	Aco2	3.02441	1.59666	1.80033e-08	47.3561	9	71	78	85.5	Aconitate hydratase, mitochondrial	Mus musculus
Q80UJ7	Rab3gap1,Kiaa0066,Rab3gap	3.02323	1.59609	0.00404105		1	9	9	110.2	Rab3 GTPase-activating protein catalytic subunit	Mus musculus
P70670	Naca,Gm1878	3.02174	1.59538	0.014041		1	6	6	220.5	Nascent polypeptide-associated complex subunit alpha, muscle-specific form	Mus musculus
Q9DC23	Dnajc10,Erdj5,Jpdi	3.0216	1.59531	0.0161145	158.894	7	72	72	90.6	DnaJ homolog subfamily C member 10	Mus musculus
Q8BH44	Coro2b	3.02128	1.59516	0.0132557		1	7	7	54.9	Coronin-2B	Mus musculus
P54729	Nub1,Nyren18	3.0113	1.59039	0.0206405		1	8	8	70.3	NEDD8 ultimate buster 1	Mus musculus
Q8JZN5	Acad9	3.00882	1.5892	0.0126494		1	9	9	68.7	Acyl-CoA dehydrogenase family member 9, mitochondrial	Mus musculus
P53395	Dbt	3.00861	1.5891	0.0497969		1	8	8	53.2	Lipoamide acyltransferase component of branched-chain alpha-keto acid dehydrogenase complex, mitochondrial	Mus musculus
Q8BGQ7	Aars	3.00379	1.58679	1.83939e-10	74.4175	19	153	167	106.9	Alanine--tRNA ligase, cytoplasmic	Mus musculus
Q8BMF4	Dlat	3.00337	1.58658	0.00107209	75.6543	4	36	36	67.9	Dihydrolipoyllysine-residue acetyltransferase component of pyruvate dehydrogenase complex, mitochondrial	Mus musculus
P97742	Cpt1a,Cpt-1,Cpt1	3.00288	1.58634	0.00202616	60.5461	2	18	18	88.3	Carnitine O-palmitoyltransferase 1, liver isoform	Mus musculus
Q9WTX5	Skp1,Skp1a	3.00009	1.58501	0.00137213	67.6479	5	50	92	18.7	S-phase kinase-associated protein 1	Mus musculus
Q80X19	Col14a1	2.99525	1.58268	0.158448		1	9	9	193	Collagen alpha-1(XIV) chain	Mus musculus
Q8CGF7	Tcerg1,Taf2s	2.99262	1.58141	1.00143e-13	86.7232	24	243	243	123.8	Transcription elongation regulator 1	Mus musculus
Q3U2S4	Otud5,DXImx46e,Sfc7	2.99218	1.5812	0.0478441	32.7784	2	11	11	60.3	OTU domain-containing protein 5	Mus musculus
Q9D0V7	Ebag9,Rcas1	2.98651	1.57846	0.0192729		1	8	8	24.3	Receptor-binding cancer antigen expressed on SiSo cells	Mus musculus
P58069	Rasa2	2.98202	1.57629	9.59879e-06	27.749	3	24	24	96.4	Ras GTPase-activating protein 2	Mus musculus
P51174	Acadl	2.9749	1.57284	4.39416e-07	13.257	4	34	34	47.9	Long-chain specific acyl-CoA dehydrogenase, mitochondrial	Mus musculus
Q99K01	Pdxdc1	2.95948	1.56534	0.00267485		1	9	9	87.3	Pyridoxal-dependent decarboxylase domain-containing protein 1	Mus musculus
Q91WC0	Setd3,D12Ertd771e	2.95333	1.56234	0.00426009	45.686	3	24	24	67.2	Histone-lysine N-methyltransferase setd3	Mus musculus
Q8K4Q0	Rptor,Raptor	2.95227	1.56182	0.00281092		1	9	9	149.5	Regulatory-associated protein of mTOR	Mus musculus
Q8CF89	Tab1,Map3k7ip1	2.95063	1.56102	0.0147196	45.2778	2	14	22	54.6	TGF-beta-activated kinase 1 and MAP3K7-binding protein 1	Mus musculus
Q9CQ80	Vps25,D11Wsu68e	2.94923	1.56034	0.06948		1	9	9	20.7	Vacuolar protein-sorting-associated protein 25	Mus musculus
Q99LC5	Etfa	2.94502	1.55828	0.0267085	10.8343	2	18	36	35	Electron transfer flavoprotein subunit alpha, mitochondrial	Mus musculus
Q8R184	Fam110a	2.94488	1.55821	0.336872		1	7	7	31.6	Protein FAM110A	Mus musculus
Q8CEC0	Nup88	2.94331	1.55744	6.12952e-10	72.8637	13	140	149	84.9	Nuclear pore complex protein Nup88	Mus musculus
Q5SWW4	Med13,Kiaa0593,Thrap1,Trap240	2.94199	1.55679	0.00118228	126.282	10	93	93	238.6	Mediator of RNA polymerase II transcription subunit 13	Mus musculus
Q99LS3	Psph	2.93761	1.55465	0.106694		1	8	8	25.1	Phosphoserine phosphatase	Mus musculus
E9Q6B2	Ccdc85c	2.93351	1.55263	0.0210245		1	8	8	45.3	Coiled-coil domain-containing protein 85C	Mus musculus
Q8CGF6	Wdr47,Kiaa0893	2.93201	1.55189	0.000493531	72.1277	5	41	41	102.3	WD repeat-containing protein 47	Mus musculus
Q8R0L9	Tada3,Ada3,Tada3l	2.92683	1.54934	0.00404105	87.5833	6	47	56	48.9	Transcriptional adapter 3	Mus musculus
P63037	Dnaja1,Dnaj2,Hsj2,Hspf4	2.92474	1.54831	0.0215597	107.397	4	28	28	44.9	DnaJ homolog subfamily A member 1	Mus musculus
Q3TCH7	Cul4a	2.92081	1.54637	0.0207783		1	9	9	87.8	Cullin-4A	Mus musculus
Q9QWV9	Ccnt1	2.91554	1.54377	0.00184752		1	9	9	80.6	Cyclin-T1	Mus musculus
P63101	Ywhaz	2.91534	1.54367	5.37118e-05	110.669	14	130	146	27.8	14-3-3 protein zeta/delta	Mus musculus
Q9D6T0	Nosip	2.91525	1.54362	0.00151868		1	8	17	33.2	Nitric oxide synthase-interacting protein	Mus musculus
P28658	Atxn10,Sca10	2.91291	1.54246	0.0265199		1	8	8	53.7	Ataxin-10	Mus musculus
Q9WVE8	Pacsin2	2.91223	1.54212	0.0035743	60.678	3	26	26	55.8	Protein kinase C and casein kinase substrate in neurons protein 2	Mus musculus
P47809	Map2k4,Jnkk1,Mek4,Mkk4,Prkmk4,Sek1,Serk1,Skk1	2.90979	1.54092	0.00215934	51.7604	2	15	15	44.1	Dual specificity mitogen-activated protein kinase kinase 4	Mus musculus
Q9D7Z3	Nol7,MNCb-1192	2.90873	1.54039	0.0387915	94.4561	2	18	25	29	Nucleolar protein 7	Mus musculus
Q8BSN3	Ccdc151	2.89867	1.53539	0.132728		1	9	9	69.7	Coiled-coil domain-containing protein 151	Mus musculus
Q9CQ10	Chmp3,Vps24	2.89597	1.53405	0.0262337	15.0718	2	16	16	25.2	Charged multivesicular body protein 3	Mus musculus
P52623	Uck1,Umpk	2.89577	1.53394	3.04091e-06	160.217	24	301	333	31.1	Uridine-cytidine kinase 1	Mus musculus
Q9CZA6	Nde1,Nude	2.8926	1.53237	0.0494845		1	8	8	38.5	Nuclear distribution protein nudE homolog 1	Mus musculus
Q80V24	Vgll4	2.88397	1.52805	0.0748742		1	9	9	31	Transcription cofactor vestigial-like protein 4	Mus musculus
P61290	Psme3	2.8832	1.52767	0.0043271	17.8803	2	15	15	29.5	Proteasome activator complex subunit 3	Mus musculus
P23475	Xrcc6,G22p1,Ku70	2.88269	1.52741	0.0126202		1	8	8	69.5	X-ray repair cross-complementing protein 6	Mus musculus
O70152	Dpm1	2.87937	1.52575	0.0005765	60.0707	3	27	27	29.2	Dolichol-phosphate mannosyltransferase subunit 1	Mus musculus
Q9D6R2	Idh3a	2.87916	1.52565	0.192083		1	7	7	39.6	Isocitrate dehydrogenase [NAD] subunit alpha, mitochondrial	Mus musculus
P70279	Surf6,Surf-6	2.87233	1.52222	1.05532e-10	80.5101	17	162	162	41.2	Surfeit locus protein 6	Mus musculus
P69566	Ranbp9,Ranbpm	2.87138	1.52174	0.0915764	163.292	7	51	51	71	Ran-binding protein 9	Mus musculus
Q8CCN5	Bcas3	2.86987	1.52099	0.128363		1	7	14	101	Breast carcinoma-amplified sequence 3 homolog	Mus musculus
P50247	Ahcy	2.85849	1.51525	0.0162669	62.2951	3	24	32	47.7	Adenosylhomocysteinase	Mus musculus
Q9D757	Dapl1,Eeda	2.85014	1.51104	0.1594		1	7	7	11.8	Death-associated protein-like 1	Mus musculus
P0C7L0	Wipf3,Cr16	2.84816	1.51003	0.0590187	132.331	3	20	20	49.5	WAS/WASL-interacting protein family member 3	Mus musculus
A2AL36	Cntrl,Cep1,Cep110	2.84577	1.50882	0.0450617		1	9	9	268.9	Centriolin	Mus musculus
Q80U93	Nup214,Kiaa0023	2.84494	1.5084	3.70566e-14	101.932	34	304	354	213	Nuclear pore complex protein Nup214	Mus musculus
Q91WJ8	Fubp1,D3Ertd330e	2.84324	1.50754	0.0407274	76.3364	4	24	24	68.5	Far upstream element-binding protein 1	Mus musculus
Q9JHS4	Clpx	2.84029	1.50604	5.07742e-06	60.8048	7	54	54	69.2	ATP-dependent Clp protease ATP-binding subunit clpX-like, mitochondrial	Mus musculus
O08553	Dpysl2,Crmp2,Ulip2	2.83509	1.5034	2.50223e-05	51.6355	5	49	56	62.3	Dihydropyrimidinase-related protein 2	Mus musculus
Q9Z0H3	Smarcb1,Baf47,Ini1,Snf5l1	2.83323	1.50245	0.0341298		1	9	9	44.1	SWI/SNF-related matrix-associated actin-dependent regulator of chromatin subfamily B member 1	Mus musculus
P61202	Cops2,Csn2,Trip15	2.83205	1.50185	1.11753e-06	79.9702	7	88	88	51.6	COP9 signalosome complex subunit 2	Mus musculus
O88712	Ctbp1	2.82801	1.49979	0.112388	56.4653	2	8	8	47.7	C-terminal-binding protein 1	Mus musculus
Q6PAR5	Gapvd1,Gapex5,Kiaa1521	2.82567	1.49859	0.00210347	41.3306	3	25	25	162.4	GTPase-activating protein and VPS9 domain-containing protein 1	Mus musculus
Q9EQU5	Set	2.82004	1.49572	7.06994e-05	89.2525	5	49	66	33.4	Protein SET	Mus musculus
Q4U2R1	Herc2,Jdf2,Kiaa0393,Rjs	2.81943	1.4954	0.000291958	68.461	6	49	49	527.5	E3 ubiquitin-protein ligase HERC2	Mus musculus
Q924C1	Xpo5,Kiaa1291,Ranbp21	2.81684	1.49408	0.0173303		1	9	9	137	Exportin-5	Mus musculus
Q61733	Mrps31,Imogn38	2.81513	1.4932	0.0176392	100.529	3	24	24	43.9	28S ribosomal protein S31, mitochondrial	Mus musculus
P47226	Tes	2.81318	1.4922	2.06294e-05	78.9969	9	89	89	48	Testin	Mus musculus
Q80VJ2	Sra1 {ECO:0000312|MGI:MGI:1344414}	2.80849	1.4898	0.0101797		1	9	9	25.6	Steroid receptor RNA activator 1	Mus musculus
E9Q7G0	Numa1	2.80759	1.48933	0.00181338	79.2811	4	34	34	235.6	Nuclear mitotic apparatus protein 1	Mus musculus
A2RSY1	Kansl3,Kiaa1310,Nsl3	2.80736	1.48922	0.000142834	103.294	10	95	95	96.1	KAT8 regulatory NSL complex subunit 3	Mus musculus
Q9CZW5	Tomm70a,D16Wsu109e	2.80641	1.48872	2.04116e-06	68.5077	9	80	80	67.6	Mitochondrial import receptor subunit TOM70	Mus musculus
A2AQ19	Rtf1	2.80208	1.4865	0.000201263	66.9145	6	49	49	80.8	RNA polymerase-associated protein RTF1 homolog	Mus musculus
Q9Z2V5	Hdac6	2.80105	1.48597	0.000711755	146.558	13	111	123	125.8	Histone deacetylase 6	Mus musculus
Q505F5	Lrrc47,Kiaa1185	2.79076	1.48066	0.101027		1	9	9	63.6	Leucine-rich repeat-containing protein 47	Mus musculus
Q8BFR5	Tufm	2.78969	1.48011	9.72125e-12	85.5939	20	215	224	49.5	Elongation factor Tu, mitochondrial	Mus musculus
P62075	Timm13,Tim13a,Timm13a	2.78756	1.479	0.1188		1	8	8	10.5	Mitochondrial import inner membrane translocase subunit Tim13	Mus musculus
Q8CGY8	Ogt	2.78663	1.47852	7.24774e-09	109.062	26	234	234	117	UDP-N-acetylglucosamine--peptide N-acetylglucosaminyltransferase 110 kDa subunit	Mus musculus
Q9ESZ8	Gtf2i,Bap135,Diws1t	2.77901	1.47457	1.51116e-12	69.7125	18	165	165	112.3	General transcription factor II-I	Mus musculus
O54988	Slk,Kiaa0204,Stk2	2.77493	1.47245	0.025132	105.761	3	27	36	141.5	STE20-like serine/threonine-protein kinase	Mus musculus
Q99JX1	Taf11	2.77019	1.46998	0.0174375	97.534	5	36	44	23.3	Transcription initiation factor TFIID subunit 11	Mus musculus
Q03958	Pfdn6,H2-Ke2,Pfd6	2.76086	1.46512	0.00278842	48.6469	2	18	18	14.5	Prefoldin subunit 6	Mus musculus
Q9DCN2	Cyb5r3,Dia1	2.75261	1.4608	0.0015731	57.8547	4	43	43	34.1	NADH-cytochrome b5 reductase 3	Mus musculus
O88544	Cops4,Csn4	2.74606	1.45736	0.0011202	31.2553	2	21	21	46.3	COP9 signalosome complex subunit 4	Mus musculus
P14152	Mdh1,Mor2	2.74414	1.45635	0.0840118		1	9	24	36.5	Malate dehydrogenase, cytoplasmic	Mus musculus
Q3U319	Rnf40,Bre1b,Kiaa0661	2.74108	1.45474	3.86229e-14	112.117	45	408	426	114	E3 ubiquitin-protein ligase BRE1B	Mus musculus
Q8R3F5	Mcat,Mt	2.73135	1.44961	0.015566	110.612	4	31	31	41.9	Malonyl-CoA-acyl carrier protein transacylase, mitochondrial	Mus musculus
Q6ZQ38	Cand1,D10Ertd516e,Kiaa0829	2.72478	1.44614	0.000114704	33.6126	6	46	46	136.3	Cullin-associated NEDD8-dissociated protein 1	Mus musculus
P47758	Srprb	2.72239	1.44487	0.00881187	87.4371	3	27	34	29.6	Signal recognition particle receptor subunit beta	Mus musculus
Q8BUR4	Dock1	2.71928	1.44323	0.126032	135.569	3	23	23	215.1	Dedicator of cytokinesis protein 1	Mus musculus
Q9D787	Ppil2	2.71618	1.44158	3.73088e-08	19.9734	2	27	27	59.1	Peptidyl-prolyl cis-trans isomerase-like 2	Mus musculus
Q8R0F6	Ilkap	2.71388	1.44036	0.0444035	96.8054	2	18	25	42.8	Integrin-linked kinase-associated serine/threonine phosphatase 2C	Mus musculus
Q80TP3	Ubr5,Edd,Edd1,Kiaa0896	2.71001	1.4383	2.28115e-11	63.4623	16	132	132	308.4	E3 ubiquitin-protein ligase UBR5	Mus musculus
P49718	Mcm5,Cdc46,Mcmd5	2.70936	1.43795	0.000371291	60.2198	4	44	52	82.3	DNA replication licensing factor MCM5	Mus musculus
P19536	Cox5b	2.70867	1.43759	0.0167899	76.1728	2	18	18	13.8	Cytochrome c oxidase subunit 5B, mitochondrial	Mus musculus
O08663	Map2,Mtap2	2.69822	1.43201	0.0286248	68.0777	1	16	25	52.9	Methionine aminopeptidase 2	Mus musculus
D3YYU8	Obsl1	2.69655	1.43111	0.000340877	70.4059	7	54	54	197.9	Obscurin-like protein 1	Mus musculus
Q99N48	Sytl3,Slp3	2.6957	1.43066	0.0491596		1	9	9	68.6	Synaptotagmin-like protein 3	Mus musculus
Q99JN2	Klhl22,Kelchl	2.69367	1.42957	0.00764766	44.7963	2	16	16	71.7	Kelch-like protein 22	Mus musculus
O35685	Nudc	2.68979	1.4275	0.0385754		1	7	7	38.4	Nuclear migration protein nudC	Mus musculus
Q69ZR2	Hectd1,Kiaa1131,Opm	2.68491	1.42487	0.0040667		1	9	9	290.1	E3 ubiquitin-protein ligase HECTD1	Mus musculus
Q9EQP2	Ehd4,Past2	2.68439	1.42459	0.00536935	103.062	6	49	49	61.5	EH domain-containing protein 4	Mus musculus
Q7TT50	Cdc42bpb,Kiaa1124	2.68226	1.42345	1.6527e-05	85.033	9	77	77	194.8	Serine/threonine-protein kinase MRCK beta	Mus musculus
Q60780	Gas7	2.68047	1.42249	0.0106083		1	9	9	48.2	Growth arrest-specific protein 7	Mus musculus
P35235	Ptpn11	2.67685	1.42053	0.0535569		1	9	22	68.5	Tyrosine-protein phosphatase non-receptor type 11	Mus musculus
Q6PDL0	Dync1li2,Dncli2,Dnclic2	2.67631	1.42024	0.0444932		1	8	8	54.2	Cytoplasmic dynein 1 light intermediate chain 2	Mus musculus
Q99K74	Med24,D11Ertd307e,Thrap4,Trap100	2.66852	1.41604	3.10986e-09	75.4048	16	152	177	110	Mediator of RNA polymerase II transcription subunit 24	Mus musculus
P25206	Mcm3,Mcmd,Mcmd3	2.66806	1.41579	3.64483e-05	45.544	4	34	34	91.5	DNA replication licensing factor MCM3	Mus musculus
A2AGH6	Med12,Kiaa0192,Mopa,Tnrc11,Trap230	2.66214	1.41258	3.25992e-14	97.3846	36	332	363	244.6	Mediator of RNA polymerase II transcription subunit 12	Mus musculus
Q80X41	Vrk1	2.6621	1.41257	0.00135593	98.3281	7	63	63	49.7	Serine/threonine-protein kinase VRK1	Mus musculus
P47740	Aldh3a2,Ahd-3,Ahd3,Aldh3,Aldh4	2.65718	1.4099	0.0152793		1	8	8	54	Fatty aldehyde dehydrogenase	Mus musculus
P21550	Eno3,Eno-3	2.65039	1.4062	0.109715		1	7	7	47	Beta-enolase	Mus musculus
Q9R1K5	Fzr1,Fyr,Fzr	2.64666	1.40417	0.0118205	59.3804	2	18	18	54.7	Fizzy-related protein homolog	Mus musculus
P70404	Idh3g	2.64541	1.40349	0.00395278	98.4914	3	43	43	42.8	Isocitrate dehydrogenase [NAD] subunit gamma 1, mitochondrial	Mus musculus
Q9DBC7	Prkar1a	2.64103	1.4011	0.00421675	55.9037	3	25	25	43.2	cAMP-dependent protein kinase type I-alpha regulatory subunit	Mus musculus
P97450	Atp5j	2.63974	1.40039	0.000932926	22.5503	2	18	18	12.5	ATP synthase-coupling factor 6, mitochondrial	Mus musculus
Q03265	Atp5a1	2.63659	1.39867	1.68645e-08	108.256	23	205	236	59.8	ATP synthase subunit alpha, mitochondrial	Mus musculus
Q9R0A5	Nek3	2.63252	1.39644	0.0669943		1	8	8	57.5	Serine/threonine-protein kinase Nek3	Mus musculus
Q8VCS6	Med9,Med25	2.62263	1.39101	0.000304188	39.6643	3	45	45	15.7	Mediator of RNA polymerase II transcription subunit 9	Mus musculus
Q99J36	Thumpd1	2.62235	1.39086	0.0154334	82.3345	3	26	26	38.9	THUMP domain-containing protein 1	Mus musculus
Q8JZQ2	Afg3l2	2.62202	1.39068	0.145106		1	8	8	89.5	AFG3-like protein 2	Mus musculus
O55201	Supt5h,Supt5	2.61283	1.38562	0.195995		1	7	7	120.7	Transcription elongation factor SPT5	Mus musculus
Q9CXR1	Dhrs7,Retsdr4	2.6122	1.38527	0.0017069	51.8031	2	18	18	38.2	Dehydrogenase/reductase SDR family member 7	Mus musculus
Q9D1P2	Kat8,Mof,Myst1	2.61206	1.38519	2.52324e-06	89.4129	10	115	115	52.6	Histone acetyltransferase KAT8	Mus musculus
Q8CDA1	Inpp5f,Kiaa0966,Sac2	2.61005	1.38408	0.00338685	133.354	10	78	78	127.6	Phosphatidylinositide phosphatase SAC2	Mus musculus
Q9QZS3	Numb	2.60229	1.37978	0.0229747	81.8208	3	20	20	70.8	Protein numb homolog	Mus musculus
P39447	Tjp1,Zo1	2.59871	1.37779	0.00603796	61.1373	2	17	17	194.7	Tight junction protein ZO-1	Mus musculus
Q6Y7W8	Gigyf2,Kiaa0642,Perq2,Tnrc15	2.58961	1.37273	1.74456e-08	134.203	28	282	303	149.2	PERQ amino acid-rich with GYF domain-containing protein 2	Mus musculus
P59598	Asxl1,Kiaa0978	2.58466	1.36998	0.000247575	46.4961	2	27	27	162.7	Putative Polycomb group protein ASXL1	Mus musculus
P67778	Phb	2.57791	1.3662	0.259952		1	7	7	29.8	Prohibitin	Mus musculus
Q80U04	Pja2,Kiaa0438,Rnf131	2.57741	1.36592	0.018259		1	8	8	78	E3 ubiquitin-protein ligase Praja-2	Mus musculus
Q6NVF9	Cpsf6	2.57581	1.36503	2.95709e-05	65.2009	6	53	53	59.2	Cleavage and polyadenylation specificity factor subunit 6	Mus musculus
P31240	Pdgfb,Sis	2.57337	1.36366	0.0166656		1	9	9	27.4	Platelet-derived growth factor subunit B	Mus musculus
Q9D5U9	Micalcl	2.57337	1.36366	0.0166656		1	9	9	75.3	MICAL C-terminal-like protein	Mus musculus
Q5DTM8	Rnf20,Bre1a,Kiaa4116	2.57091	1.36228	6.14877e-15	114.403	44	428	455	113.5	E3 ubiquitin-protein ligase BRE1A	Mus musculus
Q78HU3	Mvb12a,Fam125a	2.57004	1.36179	0.280273		1	9	9	28.7	Multivesicular body subunit 12A	Mus musculus
Q9D7B7	Gpx8	2.5661	1.35957	0.167884		1	8	16	24.1	Probable glutathione peroxidase 8	Mus musculus
Q8C726	Btbd9	2.56342	1.35807	0.00325489	113.369	9	68	68	69.1	BTB/POZ domain-containing protein 9	Mus musculus
E9Q6J5	Bod1l {ECO:0000312|MGI:MGI:2444804},Kiaa1327 {ECO:0000303|PubMed:12693553}	2.55974	1.356	6.83595e-07	76.1789	9	71	80	327.5	Biorientation of chromosomes in cell division protein 1-like 1	Mus musculus
P10126	Eef1a1,Eef1a	2.55612	1.35396	0.00235293	208.902	22	225	264	50.1	Elongation factor 1-alpha 1	Mus musculus
Q60949	Tbc1d1,Kiaa1108,Tbc1	2.55568	1.35371	0.356347	252.412	2	18	18	142	TBC1 domain family member 1	Mus musculus
O89023	Tpp1,Cln2	2.55206	1.35166	0.00267485	43.0884	2	25	25	61.3	Tripeptidyl-peptidase 1	Mus musculus
P53995	Anapc1,Mcpr,Tsg24	2.55179	1.35151	3.6015e-05	60.1638	6	51	60	216	Anaphase-promoting complex subunit 1	Mus musculus
Q9CWZ7	Napg,Snapg	2.55093	1.35102	0.0592175		1	9	9	34.7	Gamma-soluble NSF attachment protein	Mus musculus
Q99JY0	Hadhb	2.55018	1.3506	0.000867318	71.9248	4	40	40	51.4	Trifunctional enzyme subunit beta, mitochondrial	Mus musculus
Q9DCX2	Atp5h	2.54978	1.35037	0.00147014	47.638	3	23	31	18.7	ATP synthase subunit d, mitochondrial	Mus musculus
Q9R0P4	Smap,Sid2057	2.54559	1.348	0.0019151	26.3953	2	18	18	20	Small acidic protein	Mus musculus
P19096	Fasn	2.54086	1.34532	0.0199844	122.569	3	20	20	272.4	Fatty acid synthase	Mus musculus
Q8K2B3	Sdha	2.53972	1.34467	0.00863907		1	9	9	72.6	Succinate dehydrogenase [ubiquinone] flavoprotein subunit, mitochondrial	Mus musculus
Q9JLQ0	Cd2ap,Mets1	2.53623	1.34269	7.95434e-05	49.2731	4	35	35	70.5	CD2-associated protein	Mus musculus
Q8BMF5	Grik4	2.53583	1.34246	0.0132426		1	9	9	107.3	Glutamate receptor ionotropic, kainate 4	Mus musculus
Q5DTI6	Kansl1l,Kiaa4189	2.53543	1.34223	0.0042433	88.6846	4	29	29	112.5	KAT8 regulatory NSL complex subunit 1-like protein	Mus musculus
Q921M4	Golga2	2.52934	1.33876	0.187926		1	8	14	113.3	Golgin subfamily A member 2	Mus musculus
Q9CT10	Ranbp3	2.52735	1.33762	0.00738231	42.5736	2	18	18	52.6	Ran-binding protein 3	Mus musculus
Q91V41	Rab14	2.52699	1.33742	0.00773214	81.5843	4	34	34	23.9	Ras-related protein Rab-14	Mus musculus
Q80TG1	Kansl1,Kiaa1267,Nsl1	2.52346	1.3354	3.72302e-10	89.3485	20	185	214	113.2	KAT8 regulatory NSL complex subunit 1	Mus musculus
P97770	Thumpd3	2.51941	1.33308	0.00056477		1	9	9	56.4	THUMP domain-containing protein 3	Mus musculus
P47941	Crkl,Crkol	2.5156	1.33091	0.000852073	36.9389	2	18	18	33.8	Crk-like protein	Mus musculus
Q60759	Gcdh	2.51311	1.32947	0.0519922		1	8	8	48.6	Glutaryl-CoA dehydrogenase, mitochondrial	Mus musculus
Q8CGK3	Lonp1,Prss15	2.50634	1.32558	0.0157459	102.619	5	41	41	105.8	Lon protease homolog, mitochondrial	Mus musculus
O09106	Hdac1	2.50611	1.32545	0.000193362	107.627	11	100	105	55.1	Histone deacetylase 1	Mus musculus
P61216	Taf13,Taf2k	2.50505	1.32484	0.0118587	28.8487	3	21	28	14.3	Transcription initiation factor TFIID subunit 13	Mus musculus
Q9QYX7	Pclo,Acz	2.50019	1.32204	0.00203622		1	9	9	550.8	Protein piccolo	Mus musculus
Q8BQR4	Kansl2,Nsl2	2.49962	1.32171	0.00202616	95.1947	6	59	76	54.2	KAT8 regulatory NSL complex subunit 2	Mus musculus
Q91YJ5	Mtif2	2.49723	1.32033	0.0653668		1	9	9	81.3	Translation initiation factor IF-2, mitochondrial	Mus musculus
P11103	Parp1,Adprp,Adprt,Adprt1	2.49521	1.31916	2.70035e-07	116.102	20	205	214	113.1	Poly [ADP-ribose] polymerase 1	Mus musculus
Q9CXU1	Med31,Soh1	2.48728	1.31457	0.000606825	78.942	4	63	81	15.8	Mediator of RNA polymerase II transcription subunit 31	Mus musculus
P27773	Pdia3,Erp,Erp60,Grp58	2.48685	1.31432	3.41342e-09	109.836	24	257	312	56.7	Protein disulfide-isomerase A3	Mus musculus
Q7TME2	Spag5	2.48562	1.31361	0.0180546		1	9	9	130	Sperm-associated antigen 5	Mus musculus
Q9JKY0	Rqcd1,Cnot9,Rcd1	2.485	1.31324	0.0289304		1	9	9	33.6	CCR4-NOT transcription complex subunit 9	Mus musculus
Q8R550	Sh3kbp1,Ruk,Seta	2.48414	1.31275	3.84712e-05	79.7305	7	59	65	78.2	SH3 domain-containing kinase-binding protein 1	Mus musculus
Q9D0M3	Cyc1	2.48258	1.31184	0.00301929		1	9	9	35.3	Cytochrome c1, heme protein, mitochondrial	Mus musculus
Q9CQD1	Rab5a,nnyRab5a	2.48178	1.31138	0.0265199		1	7	7	23.6	Ras-related protein Rab-5A	Mus musculus
Q9D0L7	Armc10	2.47038	1.30473	0.00802223		1	9	9	33.3	Armadillo repeat-containing protein 10	Mus musculus
Q8BMP6	Acbd3,Gcp60,Pap7	2.46553	1.30189	0.00174386	52.2045	4	34	34	60.2	Golgi resident protein GCP60	Mus musculus
O88665	Brd7,Bp75	2.45712	1.29697	0.0591913		1	7	7	74	Bromodomain-containing protein 7	Mus musculus
Q8BSF4	Pisd	2.45533	1.29592	0.000961158	76.8365	5	43	43	45.9	Phosphatidylserine decarboxylase proenzyme	Mus musculus
Q6NZN0	Rbm26	2.44734	1.29121	1.11332e-09	71.3837	15	131	131	114.1	RNA-binding protein 26	Mus musculus
Q6IFX2	Krt42,Ka22	2.44467	1.28964	0.319966		1	9	18	50.1	Keratin, type I cytoskeletal 42	Mus musculus
Q3THK7	Gmps	2.44365	1.28904	0.00578278	107.588	7	57	57	76.7	GMP synthase [glutamine-hydrolyzing]	Mus musculus
P70699	Gaa	2.44278	1.28852	0.0209895	95.6203	2	18	18	106.2	Lysosomal alpha-glucosidase	Mus musculus
Q9Z1N5	Ddx39b,Bat1,Bat1a,Uap56	2.43918	1.28639	0.184848	131.294	2	17	17	49	Spliceosome RNA helicase Ddx39b	Mus musculus
Q78IK4	Apool,Fam121a,Mic27	2.43563	1.28429	0.000115641	16.4702	3	27	27	29.3	MICOS complex subunit Mic27	Mus musculus
Q07113	Igf2r	2.42907	1.2804	0.0094361		1	9	9	273.8	Cation-independent mannose-6-phosphate receptor	Mus musculus
Q99J39	Mlycd	2.41351	1.27113	0.26854	213.748	4	25	55	54.7	Malonyl-CoA decarboxylase, mitochondrial	Mus musculus
Q9D5V5	Cul5	2.4131	1.27089	0.0017114	90.9215	7	54	54	91	Cullin-5	Mus musculus
P09405	Ncl,Nuc	2.41306	1.27086	7.59545e-10	179.671	56	610	652	76.7	Nucleolin	Mus musculus
Q6PFD9	Nup98	2.41083	1.26953	7.86583e-05	46.711	4	35	35	197.2	Nuclear pore complex protein Nup98-Nup96	Mus musculus
Q8BGS3	Zkscan1	2.40976	1.26889	0.0120016		1	8	8	63.4	Zinc finger protein with KRAB and SCAN domains 1	Mus musculus
P18760	Cfl1	2.40174	1.26408	0.0931207	191.409	6	64	105	18.6	Cofilin-1	Mus musculus
Q6KAR6	Exoc3,Sec6l1	2.3994	1.26267	0.011199		1	9	9	86.5	Exocyst complex component 3	Mus musculus
P62774	Mtpn,Gcdp	2.38627	1.25475	0.153017	156.889	2	18	18	12.9	Myotrophin	Mus musculus
P08003	Pdia4,Cai,Erp72	2.38411	1.25345	0.000992673	107.292	11	85	91	72	Protein disulfide-isomerase A4	Mus musculus
Q9DAW9	Cnn3	2.38201	1.25218	3.33456e-05	108.152	7	74	110	36.4	Calponin-3	Mus musculus
Q9Z1W9	Stk39,Spak	2.37854	1.25008	0.0207783	160.737	10	80	94	60.3	STE20/SPS1-related proline-alanine-rich protein kinase	Mus musculus
Q80TY0	Fnbp1,Fbp17,Kiaa0554	2.37807	1.24979	0.0389493	89.7506	2	18	18	71.3	Formin-binding protein 1	Mus musculus
Q8VCB2	Med25	2.37342	1.24697	0.00135053	107.605	5	53	75	78.1	Mediator of RNA polymerase II transcription subunit 25	Mus musculus
Q8C166	Cpne1	2.36837	1.24389	0.110033		1	8	8	58.9	Copine-1	Mus musculus
Q9ERC8	Dscam	2.36719	1.24317	0.0415976		1	9	9	222.3	Down syndrome cell adhesion molecule homolog	Mus musculus
O08582	Gtpbp1,Gtpbp	2.36694	1.24302	0.0291516	105.693	3	34	34	72.3	GTP-binding protein 1	Mus musculus
Q80YR4	Znf598,Zfp598	2.36678	1.24293	5.96503e-06	88.2059	12	111	120	99.2	Zinc finger protein 598	Mus musculus
Q9QXV3	Ing1	2.36593	1.24241	0.00233515	79.966	3	29	29	32.1	Inhibitor of growth protein 1	Mus musculus
Q8CIE6	Copa	2.36429	1.2414	4.05546e-06	31.8405	7	57	63	138.4	Coatomer subunit alpha	Mus musculus
Q8BG51	Rhot1,Arht1	2.36251	1.24032	0.0109231		1	9	9	72.2	Mitochondrial Rho GTPase 1	Mus musculus
Q91VJ5	Pqbp1,Npw38	2.35923	1.23832	0.0278533		1	9	9	30.6	Polyglutamine-binding protein 1	Mus musculus
Q9D1P0	Mrpl13	2.35851	1.23788	0.0396553		1	8	8	20.7	39S ribosomal protein L13, mitochondrial	Mus musculus
Q3UHJ0	Aak1,Kiaa1048	2.35732	1.23715	0.0194431		1	9	9	103.3	AP2-associated protein kinase 1	Mus musculus
P56480	Atp5b	2.35696	1.23693	0.0014893	117.315	10	78	103	56.3	ATP synthase subunit beta, mitochondrial	Mus musculus
Q99N94	Mrpl9	2.35664	1.23673	0.0170711		1	9	9	30.2	39S ribosomal protein L9, mitochondrial	Mus musculus
Q99N87	Mrps5	2.35542	1.23598	0.005174	67.7053	3	24	24	48.2	28S ribosomal protein S5, mitochondrial	Mus musculus
Q70UZ7	Vwa2,Amaco	2.35376	1.23497	0.157262		1	9	9	85.6	von Willebrand factor A domain-containing protein 2	Mus musculus
O35857	Timm44,Mimt44,Tim44	2.34785	1.23134	0.145106	209.888	7	56	71	51.1	Mitochondrial import inner membrane translocase subunit TIM44	Mus musculus
Q63850	Nup62	2.34212	1.22782	0.124566	137.062	2	18	18	53.3	Nuclear pore glycoprotein p62	Mus musculus
P26516	Psmd7,Mov-34,Mov34	2.33454	1.22314	0.0198775	7.63047	2	16	24	36.5	26S proteasome non-ATPase regulatory subunit 7	Mus musculus
Q8K224	Nat10,Kiaa1709	2.3339	1.22274	4.19519e-09	108.786	26	244	287	115.4	N-acetyltransferase 10	Mus musculus
P58281	Opa1	2.32947	1.22	0.0363222	93.0308	2	18	24	111.3	Dynamin-like 120 kDa protein, mitochondrial	Mus musculus
Q03141	Mark3,Emk2,Mpk10	2.32843	1.21936	2.9653e-10	60.719	15	118	118	84.4	MAP/microtubule affinity-regulating kinase 3	Mus musculus
O70591	Pfdn2,Pfd2	2.32677	1.21833	0.0174249	80.2502	3	23	23	16.5	Prefoldin subunit 2	Mus musculus
P48962	Slc25a4,Anc1,Ant1	2.32449	1.21691	0.276053	262.105	6	46	46	32.9	ADP/ATP translocase 1	Mus musculus
Q80XQ2	Tbc1d5	2.32219	1.21549	6.69381e-06	170.721	33	303	328	91.8	TBC1 domain family member 5	Mus musculus
O54950	Prkag1,Prkaac	2.32202	1.21538	4.27171e-06		1	9	9	37.5	5'-AMP-activated protein kinase subunit gamma-1	Mus musculus
Q91ZU6	Dst,Bpag1,Macf2	2.32083	1.21464	2.93414e-08	74.6075	15	118	118	834.2	Dystonin	Mus musculus
Q9D706	Rpap3,D15Ertd682e	2.31909	1.21356	6.84118e-05	72.6864	6	52	59	74.1	RNA polymerase II-associated protein 3	Mus musculus
Q9D6S7	Mrrf	2.31696	1.21224	0.00821784	75.6078	4	30	30	29.1	Ribosome-recycling factor, mitochondrial	Mus musculus
Q8BZX4	Srek1,Sfrs12,Srrp86	2.31116	1.20862	0.162848		1	8	8	56.8	Splicing regulatory glutamine/lysine-rich protein 1	Mus musculus
E9Q557	Dsp	2.30796	1.20662	0.10645	80.6796	3	24	68	332.9	Desmoplakin	Mus musculus
Q8CDI2	Fbxo43,Emi2	2.30437	1.20437	0.0334917		1	9	9	71.2	F-box only protein 43	Mus musculus
P57776	Eef1d	2.30263	1.20328	0.000405031	111.14	8	90	98	31.3	Elongation factor 1-delta	Mus musculus
P59053	Kcng3	2.30191	1.20283	0.113722		1	9	9	49.2	Potassium voltage-gated channel subfamily G member 3	Mus musculus
Q9QY36	Naa10,Ard1,Ard1a,Te2	2.29811	1.20045	0.343677	76.7521	2	8	8	26.5	N-alpha-acetyltransferase 10	Mus musculus
Q8BFQ4	Wdr82,Cdw5	2.29591	1.19907	0.00690303	67.2146	2	18	18	35.1	WD repeat-containing protein 82	Mus musculus
Q9JI10	Stk3,Mess1,Mst2	2.2923	1.1968	0.02798	82.1901	4	28	28	56.9	Serine/threonine-protein kinase 3	Mus musculus
Q9CQZ5	Ndufa6	2.28992	1.1953	0.126355	85.0256	2	10	10	15.3	NADH dehydrogenase [ubiquinone] 1 alpha subcomplex subunit 6	Mus musculus
P99024	Tubb5	2.28895	1.19469	0.0913797	150.357	4	40	61	49.7	Tubulin beta-5 chain	Mus musculus
Q9DCJ7	Aurkaip1,Aip,Akip,Mrps38	2.2824	1.19055	0.091935	179.376	4	45	45	23.3	Aurora kinase A-interacting protein	Mus musculus
P63280	Ube2i,Ubc9,Ubce2i,Ubce9	2.2821	1.19036	0.00469458	30.9851	2	13	13	18	SUMO-conjugating enzyme UBC9	Mus musculus
Q60953	Pml	2.28103	1.18969	5.57008e-06	152.053	24	250	305	98.2	Protein PML	Mus musculus
P42208	Sept2,Nedd-5,Nedd5	2.27497	1.18585	0.0103986	66.7724	3	27	34	41.5	Septin-2	Mus musculus
Q9QYB5	Add3,Addl	2.27398	1.18522	0.10645	125.53	4	24	24	78.8	Gamma-adducin	Mus musculus
Q8VC52	Rbpms2	2.27267	1.18439	0.0185074	47.8299	2	25	34	22.5	RNA-binding protein with multiple splicing 2	Mus musculus
Q99J95	Cdk9	2.26968	1.18249	0.000166967	43.6239	3	24	31	42.8	Cyclin-dependent kinase 9	Mus musculus
Q8VDG3	Parn	2.26782	1.18131	0.0653668		1	9	9	71.6	Poly(A)-specific ribonuclease PARN	Mus musculus
Q9ES56	Trappc4,Sbdn	2.26138	1.1772	0.00567399		1	9	9	24.4	Trafficking protein particle complex subunit 4	Mus musculus
Q8K595	Mcoln2	2.25915	1.17578	0.0281245		1	8	8	65.4	Mucolipin-2	Mus musculus
Q9D024	Ccdc47,Asp4	2.25881	1.17557	0.0188501		1	9	15	55.8	Coiled-coil domain-containing protein 47	Mus musculus
O08547	Sec22b,Sec22l1	2.25487	1.17305	0.0292104	64.1762	2	16	33	24.7	Vesicle-trafficking protein SEC22b	Mus musculus
Q9JKR6	Hyou1,Grp170	2.25452	1.17282	0.0863487	99.3144	2	18	18	111.2	Hypoxia up-regulated protein 1	Mus musculus
Q6DID3	Scaf8,Kiaa1116,Rbm16	2.25424	1.17264	0.050321	96.7998	2	17	17	139.6	Protein SCAF8	Mus musculus
Q9CY16	Mrps28	2.25339	1.1721	0.0486023		1	9	9	20.5	28S ribosomal protein S28, mitochondrial	Mus musculus
P35486	Pdha1,Pdha-1	2.25288	1.17177	0.357524		1	6	6	43.2	Pyruvate dehydrogenase E1 component subunit alpha, somatic form, mitochondrial	Mus musculus
Q921N6	Ddx27	2.25279	1.17171	0.00381139	94.1273	5	44	51	85.9	Probable ATP-dependent RNA helicase DDX27	Mus musculus
P54822	Adsl,Adl	2.25132	1.17077	0.171994	217.981	6	48	55	54.9	Adenylosuccinate lyase	Mus musculus
Q6ZQ06	Cep162,Kiaa1009,Qn1	2.24794	1.1686	0.000405031		1	9	9	160.9	Centrosomal protein of 162 kDa	Mus musculus
P63321	Rala,Ral,Ral-a	2.24657	1.16773	0.000167493	30.9618	3	27	27	23.6	Ras-related protein Ral-A	Mus musculus
Q8R035	Ict1,Mrpl58	2.24534	1.16693	0.0123145		1	6	6	23.5	Peptidyl-tRNA hydrolase ICT1, mitochondrial	Mus musculus
Q9JLV5	Cul3	2.24352	1.16577	1.32525e-06	118.326	21	193	202	88.9	Cullin-3	Mus musculus
Q91YJ3	Thyn1,Thy28	2.23904	1.16288	0.00125917	103.108	8	74	74	26.2	Thymocyte nuclear protein 1	Mus musculus
Q8R404	Mic13 {ECO:0000250|UniProtKB:Q5XKP0},Qil1	2.23884	1.16275	0.00168232		1	9	9	13.4	MICOS complex subunit MIC13	Mus musculus
Q9DBE8	Alg2,MNCb-5081	2.23869	1.16266	0.160692		1	9	9	47.4	Alpha-1,3/1,6-mannosyltransferase ALG2	Mus musculus
Q9CZP7	Cdc37l1	2.23254	1.15868	0.00529123		1	8	8	38.4	Hsp90 co-chaperone Cdc37-like 1	Mus musculus
Q9D8N0	Eef1g	2.23115	1.15779	0.000236474	120.739	12	120	125	50.1	Elongation factor 1-gamma	Mus musculus
O70251	Eef1b,Eef1b2	2.22898	1.15638	0.092157	209.339	6	63	72	24.7	Elongation factor 1-beta	Mus musculus
Q01853	Vcp	2.22555	1.15416	1.04368e-05	103.711	12	108	116	89.3	Transitional endoplasmic reticulum ATPase	Mus musculus
B0QZF7	Proca1	2.22347	1.15281	0.000543659		1	8	8	34.9	Protein PROCA1	Mus musculus
Q9Z2C4	Mtmr1	2.22194	1.15182	1.1488e-06	118.715	20	192	203	75.3	Myotubularin-related protein 1	Mus musculus
Q9ESL4	Zak,Mltk	2.22176	1.1517	0.00739202	70.0904	3	26	26	91.7	Mitogen-activated protein kinase kinase kinase MLT	Mus musculus
Q8CIW5	Peo1	2.21749	1.14893	0.03352		1	9	9	77	Twinkle protein, mitochondrial	Mus musculus
Q9WV03	Fam50a,D0HXS9928E,Xap5	2.20638	1.14168	0.00678979	81.6337	4	32	38	40.3	Protein FAM50A	Mus musculus
P56212	Arpp19	2.20492	1.14073	0.0812277		1	8	8	12.3	cAMP-regulated phosphoprotein 19	Mus musculus
Q8BJF9	Chmp2b	2.20379	1.13998	0.00359661	22.079	2	17	17	23.9	Charged multivesicular body protein 2b	Mus musculus
Q99MN1	Kars	2.19788	1.13611	0.000119288	87.1346	9	85	92	67.8	Lysine--tRNA ligase	Mus musculus
Q9QYJ3	Dnajb1,Hsp40,Hspf1	2.19527	1.1344	0.0866995		1	9	9	38.2	DnaJ homolog subfamily B member 1	Mus musculus
P09542	Myl3,Mlc1v,Mylc	2.19104	1.13161	0.276496		1	7	7	22.4	Myosin light chain 3	Mus musculus
P62876	Polr2l	2.18924	1.13043	0.254515		1	9	9	7.6	DNA-directed RNA polymerases I, II, and III subunit RPABC5	Mus musculus
Q924H7	Wac,Kiaa1844	2.18832	1.12982	2.0776e-05	140.382	21	205	205	70.7	WW domain-containing adapter protein with coiled-coil	Mus musculus
Q9QUJ7	Acsl4,Acs4,Facl4	2.18671	1.12876	0.00267124	80.3422	8	46	46	79.1	Long-chain-fatty-acid--CoA ligase 4	Mus musculus
Q9JMD0	Znf207,Bugz,Zep,Zfp207	2.18116	1.1251	0.0862311	122.051	1	18	18	52.8	BUB3-interacting and GLEBS motif-containing protein ZNF207	Mus musculus
Q921L3	Tmco1	2.18083	1.12487	0.199625	188.045	3	31	31	21.2	Calcium load-activated calcium channel	Mus musculus
Q99NH2	Pard3,Par3	2.1802	1.12446	1.40951e-07	88.3847	16	131	135	149.1	Partitioning defective 3 homolog	Mus musculus
P61028	Rab8b	2.17311	1.11976	0.0454658		1	9	9	23.6	Ras-related protein Rab-8B	Mus musculus
Q9CZ30	Ola1,Gtpbp9	2.17242	1.1193	0.0136144	147.001	9	76	76	44.7	Obg-like ATPase 1	Mus musculus
Q2TBE6	Pi4k2a	2.17208	1.11908	0.067913		1	7	7	54.3	Phosphatidylinositol 4-kinase type 2-alpha	Mus musculus
Q91WT4	Dnajc17	2.17069	1.11815	0.0491914		1	9	9	34.5	DnaJ homolog subfamily C member 17	Mus musculus
Q9QZE5	Copg1,Copg	2.16751	1.11604	0.272939	182.307	4	29	29	97.5	Coatomer subunit gamma-1	Mus musculus
Q91WJ7	Spats2l	2.16731	1.11591	7.84353e-06	71.8092	7	68	75	61.7	SPATS2-like protein	Mus musculus
Q9DB20	Atp5o,D12Wsu28e	2.16395	1.11367	0.00125419	107.767	8	72	72	23.4	ATP synthase subunit O, mitochondrial	Mus musculus
Q3UQ84	Tars2,Tarsl1	2.16326	1.11321	0.0386253		1	9	9	81.7	Threonine--tRNA ligase, mitochondrial	Mus musculus
Q9JKV1	Adrm1,Gp110	2.16201	1.11237	0.00496748	33.375	2	18	18	42.1	Proteasomal ubiquitin receptor ADRM1	Mus musculus
P42227	Stat3,Aprf	2.15953	1.11072	0.0365457	127.638	4	32	40	88.1	Signal transducer and activator of transcription 3	Mus musculus
Q8BH95	Echs1	2.15816	1.1098	0.0370165	118.712	5	43	51	31.5	Enoyl-CoA hydratase, mitochondrial	Mus musculus
Q9JIF7	Copb1,Copb	2.15684	1.10892	0.00673474	96.9918	5	51	60	107.1	Coatomer subunit beta	Mus musculus
Q99LC8	Eif2b1	2.15298	1.10633	0.604158	405.97	2	17	17	33.8	Translation initiation factor eIF-2B subunit alpha	Mus musculus
Q9D7N9	Apmap	2.1458	1.10151	0.054067		1	9	14	46.4	Adipocyte plasma membrane-associated protein	Mus musculus
P61971	Nutf2,Ntf2	2.14466	1.10075	0.12207		1	9	9	14.5	Nuclear transport factor 2	Mus musculus
Q9D023	Mpc2,Brp44	2.14279	1.09949	0.00533095		1	9	9	14.3	Mitochondrial pyruvate carrier 2	Mus musculus
Q9CQA5	Med4,Vdrip	2.14242	1.09924	0.00604348	152.182	9	80	80	29.8	Mediator of RNA polymerase II transcription subunit 4	Mus musculus
O70589	Cask	2.14235	1.09919	0.154875		1	9	9	105.1	Peripheral plasma membrane protein CASK	Mus musculus
Q91X43	Sh3d19	2.13998	1.0976	0.00266849		1	9	9	86.1	SH3 domain-containing protein 19	Mus musculus
Q3UJD6	Usp19,Kiaa0891	2.13911	1.09701	0.0438836		1	9	9	150.5	Ubiquitin carboxyl-terminal hydrolase 19	Mus musculus
P97807	Fh,Fh1	2.13595	1.09488	0.0054148		1	9	9	54.4	Fumarate hydratase, mitochondrial	Mus musculus
Q7TPV2	Dzip3,Kiaa0675	2.13459	1.09396	0.0748647		1	7	7	138	E3 ubiquitin-protein ligase DZIP3	Mus musculus
A6X8Z5	Arhgap31,Cdgap,Kiaa1204	2.13295	1.09285	0.071181		1	8	8	155.3	Rho GTPase-activating protein 31	Mus musculus
Q6JPI3	Med13l,Kiaa1025,Thrap2,Trap240l	2.1303	1.09106	0.0113144	93.5959	4	36	36	241.8	Mediator of RNA polymerase II transcription subunit 13-like	Mus musculus
Q6P5D8	Smchd1,Kiaa0650	2.12968	1.09064	0.0696579	109.223	2	18	25	225.6	Structural maintenance of chromosomes flexible hinge domain-containing protein 1	Mus musculus
Q9WUK2	Eif4h,Wbscr1	2.12867	1.08995	0.00616481	99.9575	5	45	45	27.3	Eukaryotic translation initiation factor 4H	Mus musculus
Q64737	Gart	2.12473	1.08728	0.0112292	114.713	7	52	68	107.5	Trifunctional purine biosynthetic protein adenosine-3	Mus musculus
O55176	Pja1	2.12388	1.0867	0.00378413	78.0498	4	35	35	63.9	E3 ubiquitin-protein ligase Praja-1	Mus musculus
A2ABV5	Med14,Crsp2,Gm641,Trap170	2.12135	1.08498	1.70468e-05	125.135	20	190	196	161	Mediator of RNA polymerase II transcription subunit 14	Mus musculus
Q9JHU4	Dync1h1,Dhc1,Dnch1,Dnchc1,Dyhc	2.11974	1.08389	5.13219e-10	130.524	49	393	423	532	Cytoplasmic dynein 1 heavy chain 1	Mus musculus
Q9CZD3	Gars	2.11835	1.08294	0.000293422	91.7757	10	85	85	81.9	Glycine--tRNA ligase	Mus musculus
P46467	Vps4b,Skd1	2.11775	1.08254	0.0888018	77.5869	2	15	15	49.4	Vacuolar protein sorting-associated protein 4B	Mus musculus
Q6A098	Secisbp2l,Kiaa0256	2.1158	1.0812	1.77561e-05	149.187	22	232	253	119.6	Selenocysteine insertion sequence-binding protein 2-like	Mus musculus
Q9CQF0	Mrpl11	2.1157	1.08114	0.0251989		1	9	9	20.7	39S ribosomal protein L11, mitochondrial	Mus musculus
Q8CHY6	Gatad2a	2.11569	1.08113	0.000515515	91.5679	6	49	67	67.3	Transcriptional repressor p66 alpha	Mus musculus
Q9QYH6	Maged1,Nrage	2.11051	1.0776	1.49634e-07	98.9332	16	165	165	85.7	Melanoma-associated antigen D1	Mus musculus
Q8BVU0	Lrch3	2.1094	1.07683	0.0016225	126.258	8	61	61	86.3	Leucine-rich repeat and calponin homology domain-containing protein 3	Mus musculus
Q8CI51	Pdlim5,Enh	2.10604	1.07454	3.48594e-06	98.2376	13	116	132	63.3	PDZ and LIM domain protein 5	Mus musculus
P68254	Ywhaq	2.10593	1.07446	0.0341289	229.491	11	101	116	27.8	14-3-3 protein theta	Mus musculus
Q8C5L3	Cnot2	2.10391	1.07307	0.0140098	112.969	7	58	58	59.7	CCR4-NOT transcription complex subunit 2	Mus musculus
Q8BH43	Wasf2,Wave2	2.1017	1.07156	0.113722	128.393	3	23	23	54.1	Wiskott-Aldrich syndrome protein family member 2	Mus musculus
Q9CYZ2	Tpd52l2	2.10051	1.07074	0.0699166	62.5641	2	17	17	24	Tumor protein D54	Mus musculus
B1AVZ0	Uprt	2.10049	1.07072	0.0395426	250.092	13	144	170	34.3	Uracil phosphoribosyltransferase homolog	Mus musculus
Q61768	Kif5b,Khcs,Kns1	2.09801	1.06902	2.61544e-06	89.6242	15	135	135	109.6	Kinesin-1 heavy chain	Mus musculus
Q9CQC6	Bzw1	2.09518	1.06707	0.0002478	54.2767	6	59	67	48	Basic leucine zipper and W2 domain-containing protein 1	Mus musculus
Q9CWG8	Ndufaf7	2.09178	1.06473	0.0153766	47.1647	3	21	21	48.4	Protein arginine methyltransferase NDUFAF7, mitochondrial	Mus musculus
Q99K28	Arfgap2,Zfp289,Znf289	2.09013	1.06359	0.0855506	118.535	3	20	20	56.6	ADP-ribosylation factor GTPase-activating protein 2	Mus musculus
Q99N93	Mrpl16	2.0886	1.06254	0.00707093	32.3362	2	18	18	28.8	39S ribosomal protein L16, mitochondrial	Mus musculus
P53986	Slc16a1,Mct1	2.08516	1.06016	0.104171	122.715	2	18	18	53.3	Monocarboxylate transporter 1	Mus musculus
Q3UMU9	Hdgfrp2	2.08347	1.05899	0.000914014	68.3044	5	45	45	74.3	Hepatoma-derived growth factor-related protein 2	Mus musculus
P61164	Actr1a,Ctrn1	2.08273	1.05848	0.124348	133.933	2	25	25	42.6	Alpha-centractin	Mus musculus
Q8K409	Polb	2.08268	1.05844	0.00901833		1	9	9	38.3	DNA polymerase beta	Mus musculus
Q9WUM3	Coro1b	2.08039	1.05685	0.00288395		1	9	9	53.9	Coronin-1B	Mus musculus
P62257	Ube2h	2.07851	1.05555	0.319116		1	7	7	20.7	Ubiquitin-conjugating enzyme E2 H	Mus musculus
P17182	Eno1,Eno-1	2.0773	1.05471	0.00696342	166.595	13	125	160	47.1	Alpha-enolase	Mus musculus
Q9CQS2	Nop10,Nola3	2.07527	1.0533	0.123128		1	9	9	7.7	H/ACA ribonucleoprotein complex subunit 3	Mus musculus
P30051	Tead1,Tcf13,Tef-1,Tef1	2.07238	1.05129	0.0627452	27.9356	1	18	18	47.9	Transcriptional enhancer factor TEF-1	Mus musculus
Q9CQJ2	Pih1d1,Nop17	2.06997	1.04961	0.0619299		1	9	9	32.2	PIH1 domain-containing protein 1	Mus musculus
Q99KJ8	Dctn2	2.06949	1.04928	0.00174149	124.117	10	97	104	44.1	Dynactin subunit 2	Mus musculus
Q9DB42	Znf593,Zfp593	2.06853	1.0486	0.092157	170.219	5	44	53	15.1	Zinc finger protein 593	Mus musculus
Q8VE10	Naa40,Nat11	2.06508	1.0462	0.147017		1	9	26	27.2	N-alpha-acetyltransferase 40	Mus musculus
Q8C7V8	Ccdc134	2.06233	1.04428	0.0113888	58.7422	2	18	18	26.5	Coiled-coil domain-containing protein 134	Mus musculus
Q3UE31		2.06142	1.04364	1.90524e-06	74.6311	12	108	108	46	Uncharacterized protein KIAA0930 homolog	Mus musculus
P68510	Ywhah	2.0606	1.04306	0.120367	140.135	3	25	25	28.2	14-3-3 protein eta	Mus musculus
Q8K0V4	Cnot3,Not3	2.05746	1.04086	0.000625315	82.7496	8	67	67	81.9	CCR4-NOT transcription complex subunit 3	Mus musculus
Q8BI29	Sarg	2.05398	1.03842	0.261985		1	6	6	65.1	Specifically androgen-regulated gene protein	Mus musculus
Q9Z2A5	Ate1	2.05352	1.0381	0.291262		1	9	9	59.1	Arginyl-tRNA--protein transferase 1	Mus musculus
Q99PE2	Ankra2,Ankra	2.05305	1.03777	0.338057		1	9	9	34.1	Ankyrin repeat family A protein 2	Mus musculus
Q3TIU4	Pde12	2.0516	1.03675	0.22363		1	8	8	67.5	2',5'-phosphodiesterase 12	Mus musculus
O35887	Calu	2.05034	1.03586	0.00845432	100.025	4	49	69	37.1	Calumenin	Mus musculus
P48725	Pcnt,Pcnt2	2.05005	1.03566	0.00842969		1	9	9	329.5	Pericentrin	Mus musculus
Q5XJY5	Arcn1,Copd	2.04959	1.03533	0.00626981	77.1903	5	38	38	57.2	Coatomer subunit delta	Mus musculus
P70362	Ufd1l	2.04805	1.03425	0.0998818		1	9	9	34.5	Ubiquitin recognition factor in ER-associated degradation protein 1	Mus musculus
Q9ESW4	Agk,Mulk	2.047	1.03351	0.0193835	72.8447	3	23	23	47	Acylglycerol kinase, mitochondrial	Mus musculus
Q9Z1F9	Uba2,Sae2,Uble1b	2.04694	1.03347	0.38781	233.316	2	18	18	70.6	SUMO-activating enzyme subunit 2	Mus musculus
P58252	Eef2	2.04429	1.0316	3.05152e-07	155.086	33	353	399	95.3	Elongation factor 2	Mus musculus
Q8BHA0	Ino80c	2.04428	1.03159	0.00297861	44.0596	2	18	18	20.4	INO80 complex subunit C	Mus musculus
O88587	Comt,Comt1	2.04373	1.03121	0.147403		1	9	9	29.5	Catechol O-methyltransferase	Mus musculus
Q9D554	Sf3a3,Sap61	2.04197	1.02996	0.0094998	95.2983	4	36	36	58.8	Splicing factor 3A subunit 3	Mus musculus
Q9DCW4	Etfb	2.04046	1.0289	0.00263708	120.329	6	51	51	27.6	Electron transfer flavoprotein subunit beta	Mus musculus
Q9Z1Z0	Uso1,Vdp	2.04017	1.02869	0.00386019	76.3271	3	36	36	107	General vesicular transport factor p115	Mus musculus
Q8BTZ4	Anapc5,MNCb-2778	2.03803	1.02718	0.10818	82.507	2	18	18	83.1	Anaphase-promoting complex subunit 5	Mus musculus
Q61211	Eif2d,Lgtn	2.03786	1.02705	2.85752e-05	91.6587	10	97	110	62.8	Eukaryotic translation initiation factor 2D	Mus musculus
O88952	Lin7c,Mals3,Veli3	2.03256	1.0233	0.0616679		1	9	9	21.8	Protein lin-7 homolog C	Mus musculus
Q9QYI3	Dnajc7,Ttc2	2.02942	1.02107	0.0251409	91.2392	4	36	36	56.5	DnaJ homolog subfamily C member 7	Mus musculus
Q61033	Tmpo,Lap2	2.0294	1.02105	0.00480336	160.055	11	112	136	75.2	Lamina-associated polypeptide 2, isoforms alpha/zeta	Mus musculus
Q6P8X1	Snx6	2.0271	1.01942	0.0671012	121.966	4	34	42	46.6	Sorting nexin-6	Mus musculus
O35963	Rab33b	2.02224	1.01595	0.0506829		1	9	9	25.8	Ras-related protein Rab-33B	Mus musculus
Q9D7W5	Med8,MNCb-2386	2.01695	1.01218	0.00525857	95.645	6	54	54	29.2	Mediator of RNA polymerase II transcription subunit 8	Mus musculus
Q80YQ2	Med23,Crsp3,Kiaa1216,Sur2	2.0155	1.01114	0.000147201	105.533	14	113	113	156.1	Mediator of RNA polymerase II transcription subunit 23	Mus musculus
Q9QX47	Son,Nrebp	2.01345	1.00967	0.00240528	217.332	24	226	226	265.7	Protein SON	Mus musculus
Q9DAT2	Mrgbp	2.0133	1.00956	0.0346175		1	9	9	22.4	MRG/MORF4L-binding protein	Mus musculus
O35381	Anp32a,Anp32,Lanp	2.00715	1.00515	0.0734905		1	9	9	28.5	Acidic leucine-rich nuclear phosphoprotein 32 family member A	Mus musculus
Q8K3B1	Fbxo45	2.00705	1.00508	0.0110318	202.672	13	136	174	30.6	F-box/SPRY domain-containing protein 1	Mus musculus
P17918	Pcna	2.00614	1.00442	0.0273473	117.62	4	36	36	28.8	Proliferating cell nuclear antigen	Mus musculus
Q8CHI8	Ep400,Kiaa1498	1.98621	0.990018	0.142714	217.178	6	50	50	337.2	E1A-binding protein p400	Mus musculus
Q8VDM4	Psmd2	1.98577	0.989698	0.0432347		1	9	9	100.2	26S proteasome non-ATPase regulatory subunit 2	Mus musculus
Q6NZQ4	Paxip1,Ptip	1.985	0.98914	0.113053	120.527	2	18	18	119.3	PAX-interacting protein 1	Mus musculus
Q61166	Mapre1	1.98468	0.988907	0.0292403	108.829	5	45	45	30	Microtubule-associated protein RP/EB family member 1	Mus musculus
P61222	Abce1,Rli	1.98307	0.987738	2.90147e-08	69.5762	12	141	141	67.3	ATP-binding cassette sub-family E member 1	Mus musculus
Q9ERU9	Ranbp2	1.97909	0.984837	5.6074e-05	82.9027	9	76	76	341.1	E3 SUMO-protein ligase RanBP2	Mus musculus
Q9JKF7	Mrpl39	1.97844	0.984364	0.00564589		1	9	9	38.5	39S ribosomal protein L39, mitochondrial	Mus musculus
P97315	Csrp1,Crp1,Csrp	1.96917	0.977586	0.0816566	157.469	4	38	38	20.6	Cysteine and glycine-rich protein 1	Mus musculus
Q8BWW9	Pkn2,Prk2,Prkcl2	1.96782	0.976597	0.0521942		1	9	9	111.6	Serine/threonine-protein kinase N2	Mus musculus
Q9D8S4	Rexo2,Smfn	1.96355	0.973465	0.0239588		1	9	9	26.7	Oligoribonuclease, mitochondrial	Mus musculus
Q6PGH2	Hn1l,D17Ertd441e	1.96323	0.973226	0.326461	221.223	3	23	29	20	Hematological and neurological expressed 1-like protein	Mus musculus
Q9ESX5	Dkc1	1.96199	0.972316	0.00720235	172.574	10	127	136	57.4	H/ACA ribonucleoprotein complex subunit 4	Mus musculus
Q8VBX6	Mpdz,Mupp1	1.96072	0.971384	0.00142924	68.52	7	61	61	218.7	Multiple PDZ domain protein	Mus musculus
Q9DB91	Med29,Ixl	1.96057	0.97127	0.00942831	133.326	7	78	78	21	Mediator of RNA polymerase II transcription subunit 29	Mus musculus
Q69ZS7	Hbs1l,Hbs1,Kiaa1038	1.95842	0.969691	0.0658435	11.6965	2	15	15	75.1	HBS1-like protein	Mus musculus
Q99P88	Nup155	1.9581	0.969455	0.0300115	124.657	7	53	53	155.1	Nuclear pore complex protein Nup155	Mus musculus
Q80UM3	Naa15,Narg1,Nat1,Tbdn-1,Tubedown	1.95283	0.965564	0.0642365	121.763	4	33	33	101	N-alpha-acetyltransferase 15, NatA auxiliary subunit	Mus musculus
Q923D5	Wbp11,Sipp1	1.95178	0.964788	0.0090326	162.449	13	108	117	69.9	WW domain-binding protein 11	Mus musculus
Q9D902	Gtf2e2	1.95164	0.964685	0.00151868	79.2218	7	59	66	33	General transcription factor IIE subunit 2	Mus musculus
Q80X85	Mrps7	1.94822	0.962155	0.164337	130.548	2	18	18	28.1	28S ribosomal protein S7, mitochondrial	Mus musculus
Q61035	Hars	1.948	0.961992	0.310004		1	9	9	57.4	Histidine--tRNA ligase, cytoplasmic	Mus musculus
Q9CTH6	Fcf1	1.94703	0.961273	0.215551		1	9	9	23.3	rRNA-processing protein FCF1 homolog	Mus musculus
O88196	Ttc3,Kiaa4119	1.94477	0.959602	0.129708	186.347	4	35	35	223.9	E3 ubiquitin-protein ligase TTC3	Mus musculus
Q8C0C7	Farsa,Farsla	1.94455	0.959437	7.88788e-05	112.599	15	136	152	57.6	Phenylalanine--tRNA ligase alpha subunit	Mus musculus
Q8BMB3	Eif4e2,Eif4el3	1.93923	0.955482	0.22356	169.082	2	18	18	28.3	Eukaryotic translation initiation factor 4E type 2	Mus musculus
P62827	Ran,Rasl2-8	1.93743	0.954143	0.0340273	198.643	10	106	115	24.4	GTP-binding nuclear protein Ran	Mus musculus
Q99M02	March2	1.93262	0.950555	0.0592175		1	9	9	27.2	E3 ubiquitin-protein ligase MARCH2	Mus musculus
Q9WUD1	Stub1,Chip	1.93088	0.94926	0.314104		1	8	8	34.9	STIP1 homology and U box-containing protein 1	Mus musculus
Q9CQA6	Chchd1,Mrps37	1.92585	0.945499	0.00867176	44.3509	2	18	18	13.6	Coiled-coil-helix-coiled-coil-helix domain-containing protein 1	Mus musculus
Q8BMS1	Hadha	1.92428	0.944315	7.27752e-06	107.396	14	149	161	82.7	Trifunctional enzyme subunit alpha, mitochondrial	Mus musculus
Q9EP72	Emc7,Orf3	1.92384	0.943987	0.0482355	4.3857	2	16	16	26.3	ER membrane protein complex subunit 7	Mus musculus
P11031	Sub1,Pc4,Rpo2tc1	1.92272	0.943145	0.0182637	189.32	11	123	131	14.4	Activated RNA polymerase II transcriptional coactivator p15	Mus musculus
Q8BH15	Cnot10	1.92249	0.942975	0.0006916	85.0393	8	69	69	81.8	CCR4-NOT transcription complex subunit 10	Mus musculus
Q6ZQ08	Cnot1,Kiaa1007	1.92148	0.942215	0.00196396	154.468	12	131	138	266.8	CCR4-NOT transcription complex subunit 1	Mus musculus
P62192	Psmc1	1.9208	0.941709	0.000346409	112.61	13	109	109	49.2	26S protease regulatory subunit 4	Mus musculus
Q80SY5	Prpf38b	1.9198	0.940955	0.0104242	115.567	5	54	54	63.8	Pre-mRNA-splicing factor 38B	Mus musculus
Q9EPK5	Wwtr1,Taz	1.9182	0.939753	0.00137929	182.487	13	187	200	43.6	WW domain-containing transcription regulator protein 1	Mus musculus
P58854	Tubgcp3,Gcp3	1.918	0.939605	0.128363	170.201	4	34	41	103.5	Gamma-tubulin complex component 3	Mus musculus
Q6PHN9	Rab35	1.9134	0.93614	0.200457		1	7	7	23	Ras-related protein Rab-35	Mus musculus
P24369	Ppib	1.91268	0.935596	0.00094021	90.5331	6	71	71	23.7	Peptidyl-prolyl cis-trans isomerase B	Mus musculus
P51881	Slc25a5,Ant2	1.91039	0.933868	0.154875	231.575	7	59	59	32.9	ADP/ATP translocase 2	Mus musculus
Q9Z2D6	Mecp2	1.90894	0.93277	0.0932208	237.093	9	83	83	52.3	Methyl-CpG-binding protein 2	Mus musculus
A2A7Y5	Miip,D4Wsu114e,Iip45	1.90762	0.931771	0.083344		1	9	9	42.8	Migration and invasion-inhibitory protein	Mus musculus
Q8BTT6	Diexf,Def	1.90753	0.931704	0.0166656	50.2013	2	18	18	88.8	Digestive organ expansion factor homolog	Mus musculus
Q8R2S9	Actr8,Arp8	1.90405	0.929074	0.0521942		1	9	9	70.5	Actin-related protein 8	Mus musculus
P38060	Hmgcl	1.90012	0.926088	0.0929231	157.725	5	42	47	34.2	Hydroxymethylglutaryl-CoA lyase, mitochondrial	Mus musculus
Q9EST5	Anp32b,Pal31	1.89938	0.925525	0.116878	113.223	2	17	17	31.1	Acidic leucine-rich nuclear phosphoprotein 32 family member B	Mus musculus
Q64152	Btf3	1.89781	0.924335	0.0368061	117.175	4	36	44	22	Transcription factor BTF3	Mus musculus
Q9DCJ5	Ndufa8	1.89524	0.92238	0.0126202		1	9	9	20	NADH dehydrogenase [ubiquinone] 1 alpha subcomplex subunit 8	Mus musculus
O70546	Kdm6a,Utx	1.89483	0.922072	0.108312		1	9	9	154.4	Lysine-specific demethylase 6A	Mus musculus
P45878	Fkbp2,Fkbp13	1.89252	0.920306	0.259952		1	9	9	15.3	Peptidyl-prolyl cis-trans isomerase FKBP2	Mus musculus
Q9R0X0	Med20,Trfp	1.89206	0.919959	0.0333243	148.803	5	54	54	23.2	Mediator of RNA polymerase II transcription subunit 20	Mus musculus
Q62418	Dbnl,Abp1,Sh3p7	1.89108	0.919207	0.0906265	101.311	2	18	18	48.7	Drebrin-like protein	Mus musculus
O88685	Psmc3,Tbp1	1.88891	0.917557	0.12785	159.365	5	39	52	49.5	26S protease regulatory subunit 6A	Mus musculus
Q8BMJ2	Lars	1.8782	0.909354	0.000360888	110.623	13	116	124	134.2	Leucine--tRNA ligase, cytoplasmic	Mus musculus
P63005	Pafah1b1,Lis-1,Lis1,Pafaha	1.87249	0.904959	0.199692		1	8	8	46.7	Platelet-activating factor acetylhydrolase IB subunit alpha	Mus musculus
Q8K215	Lyrm4,Isd11	1.86936	0.902546	0.437419		1	7	7	10.9	LYR motif-containing protein 4	Mus musculus
Q8BRN9	Cc2d1b,Kiaa1836	1.8684	0.901806	0.0286494		1	7	7	93.1	Coiled-coil and C2 domain-containing protein 1B	Mus musculus
Q8VCH8	Ubxn4,Ubxd2,Ubxdc1	1.86608	0.900012	0.152074	109.339	2	17	23	56.5	UBX domain-containing protein 4	Mus musculus
Q8K2H1	Pphln1	1.86385	0.898285	0.0683269		1	7	7	43.8	Periphilin-1	Mus musculus
Q8R0G9	Nup133	1.86329	0.897852	0.00161086	88.119	5	42	42	128.6	Nuclear pore complex protein Nup133	Mus musculus
P13439	Umps	1.86144	0.896421	0.046579	83.4206	2	15	24	52.3	Uridine 5'-monophosphate synthase	Mus musculus
Q9DB43	Zfpl1	1.85988	0.895209	0.0276461		1	9	9	34.2	Zinc finger protein-like 1	Mus musculus
Q9D8S3	Arfgap3	1.85771	0.893527	0.0187864	107.736	4	36	36	57.5	ADP-ribosylation factor GTPase-activating protein 3	Mus musculus
P26369	U2af2,U2af65	1.85505	0.891457	0.0482891	150.546	4	45	52	53.5	Splicing factor U2AF 65 kDa subunit	Mus musculus
A2CG63	Arid4b,Sap180	1.8539	0.890564	0.169619	168.064	3	27	27	147.6	AT-rich interactive domain-containing protein 4B	Mus musculus
O70310	Nmt1	1.85388	0.890546	0.0247021	176.347	10	87	87	56.9	Glycylpeptide N-tetradecanoyltransferase 1	Mus musculus
Q921D4	Med6	1.85225	0.889282	0.00301604	108.898	7	72	72	28.4	Mediator of RNA polymerase II transcription subunit 6	Mus musculus
Q8BJ71	Nup93,Cip4,Kiaa0095	1.85081	0.888156	0.34106	204.44	3	20	25	93.3	Nuclear pore complex protein Nup93	Mus musculus
O35382	Exoc4,Sec8,Sec8l1	1.84592	0.88434	0.0777585	103.841	2	18	18	110.5	Exocyst complex component 4	Mus musculus
Q8BTW8	Cdk5rap1	1.84566	0.884135	0.000887078	199.939	26	243	265	66.1	CDK5 regulatory subunit-associated protein 1	Mus musculus
Q9CPQ8	Atp5l	1.84542	0.883947	0.00854655	46.0199	3	23	23	11.4	ATP synthase subunit g, mitochondrial	Mus musculus
Q80XU3	Nucks1,Nucks	1.83992	0.879646	0.0363724		1	9	9	26.3	Nuclear ubiquitous casein and cyclin-dependent kinase substrate 1	Mus musculus
Q8BGR2	Lrrc8d,Lrrc5	1.83992	0.879642	0.0419239		1	9	9	98.1	Volume-regulated anion channel subunit LRRC8D	Mus musculus
P54071	Idh2	1.83784	0.878015	0.250908	114.425	2	17	17	50.9	Isocitrate dehydrogenase [NADP], mitochondrial	Mus musculus
Q8K1R3	Pnpt1,Pnpase	1.83644	0.87691	0.0552249		1	9	9	85.7	Polyribonucleotide nucleotidyltransferase 1, mitochondrial	Mus musculus
Q9Z2H5	Epb41l1,Epb4,Epb4.1l1,Kiaa0338	1.83313	0.87431	0.112388		1	6	6	98.3	Band 4.1-like protein 1	Mus musculus
Q6P7W2	Shkbp1,Sb1	1.83282	0.874067	0.0250604		1	9	9	76.1	SH3KBP1-binding protein 1	Mus musculus
Q9QXK3	Copg2	1.83041	0.872166	0.0841483	119.634	5	32	32	97.7	Coatomer subunit gamma-2	Mus musculus
Q8CG79	Tp53bp2,Aspp2,Trp53bp2	1.8302	0.872002	0.0115369	98.2983	4	36	36	125.3	Apoptosis-stimulating of p53 protein 2	Mus musculus
Q8K3P5	Cnot6,Ccr4,Kiaa1194	1.82711	0.869563	0.213578		1	7	7	63.3	CCR4-NOT transcription complex subunit 6	Mus musculus
Q61074	Ppm1g,Fin13,Ppm1c	1.81737	0.86185	0.0516473	150.664	5	51	51	58.7	Protein phosphatase 1G	Mus musculus
Q8K386	Rab15	1.8149	0.859892	0.055914		1	9	9	24.3	Ras-related protein Rab-15	Mus musculus
Q9R1R2	Trim3,Hac1,Rnf22	1.81349	0.858765	0.0363871	5.7316	2	17	17	80.8	Tripartite motif-containing protein 3	Mus musculus
Q6PER3	Mapre3	1.81289	0.858294	0.118433	23.2209	2	16	16	32	Microtubule-associated protein RP/EB family member 3	Mus musculus
Q8CIV8	Tbce	1.81239	0.857893	0.195058		1	7	7	59.1	Tubulin-specific chaperone E	Mus musculus
Q99N95	Mrpl3	1.8123	0.857822	0.0151164		1	9	9	39.1	39S ribosomal protein L3, mitochondrial	Mus musculus
Q9CR39	Wdr45b,Wdr45l,Wipi3	1.8094	0.855515	0.368508		1	8	8	38	WD repeat domain phosphoinositide-interacting protein 3	Mus musculus
P39054	Dnm2,Dyn2	1.8084	0.854713	0.0808476	49.118	2	25	38	98.1	Dynamin-2	Mus musculus
Q9Z1Q5	Clic1	1.80428	0.851425	0.0051619	89.302	5	43	43	27	Chloride intracellular channel protein 1	Mus musculus
Q80UU9	Pgrmc2	1.80399	0.851192	0.148545		1	9	9	23.3	Membrane-associated progesterone receptor component 2	Mus musculus
Q9DB40	Med27,Crsp8	1.80022	0.848177	0.0683269	228.279	10	83	83	35.3	Mediator of RNA polymerase II transcription subunit 27	Mus musculus
O35250	Exoc7,Exo70	1.79992	0.847931	0.175937		1	9	9	80	Exocyst complex component 7	Mus musculus
Q9QWY8	Asap1,Ddef1,Kiaa1249,Shag1	1.797	0.845594	0.578057		1	5	5	127.4	Arf-GAP with SH3 domain, ANK repeat and PH domain-containing protein 1	Mus musculus
P46471	Psmc2,Mss1	1.79551	0.84439	0.0448103	142.577	7	59	59	48.6	26S protease regulatory subunit 7	Mus musculus
P30999	Ctnnd1,Catns,Kiaa0384	1.79455	0.843625	6.87605e-06	127.325	18	216	225	104.9	Catenin delta-1	Mus musculus
Q6PGF3	Med16,Thrap5	1.79285	0.842255	0.000240769	107.502	11	108	114	91.8	Mediator of RNA polymerase II transcription subunit 16	Mus musculus
Q8CBY8	Dctn4	1.79065	0.840482	0.301721		1	8	8	53.1	Dynactin subunit 4	Mus musculus
Q9CW03	Smc3,Bam,Bmh,Cspg6,Mmip1,Smc3l1,Smcd	1.78804	0.838379	0.104247	55.9005	2	17	17	141.6	Structural maintenance of chromosomes protein 3	Mus musculus
Q3UPL0	Sec31a,Sec31l1	1.78648	0.837123	0.000992673	64.9755	4	44	44	133.6	Protein transport protein Sec31A	Mus musculus
Q80UU2	Rpp38	1.78605	0.836774	0.0318764		1	9	9	31.1	Ribonuclease P protein subunit p38	Mus musculus
A2A884	Hivep3,KBP1,Kiaa1555,Krc,Rc,shn3,Zas3	1.78355	0.834751	0.0748647		1	9	9	253.4	Transcription factor HIVEP3	Mus musculus
Q80YV3	Trrap	1.77706	0.829492	0.0190895	19.1937	2	18	18	291.6	Transformation/transcription domain-associated protein	Mus musculus
O89086	Rbm3	1.77705	0.829486	0.00341944	125.213	8	92	99	16.6	RNA-binding protein 3	Mus musculus
Q1HFZ0	Nsun2,D13Wsu123e,Misu	1.77662	0.829132	1.12395e-05	129.975	21	200	209	85.5	tRNA (cytosine(34)-C(5))-methyltransferase	Mus musculus
A2A6A1	Gpatch8,Gpatc8,Kiaa0553	1.77575	0.828425	0.0204521	84.702	4	34	34	165	G patch domain-containing protein 8	Mus musculus
P10711	Tcea1,Tceat	1.77484	0.827691	0.0882566	162.852	6	50	50	33.9	Transcription elongation factor A protein 1	Mus musculus
Q61171	Prdx2,Tdpx1,Tpx	1.77223	0.825567	0.157298	135.662	2	18	33	21.8	Peroxiredoxin-2	Mus musculus
Q8VCD5	Med17,Crsp6,Trap80	1.76991	0.823676	0.0666957	175.019	8	62	71	72.5	Mediator of RNA polymerase II transcription subunit 17	Mus musculus
Q64487	Ptprd	1.76914	0.823048	0.508695		1	8	8	214.4	Receptor-type tyrosine-protein phosphatase delta	Mus musculus
Q99KG3	Rbm10,Kiaa0122	1.76864	0.822641	0.0275799	84.139	3	25	25	103.5	RNA-binding protein 10	Mus musculus
Q9DB77	Uqcrc2	1.76495	0.81963	0.0120513	118.909	7	61	71	48.2	Cytochrome b-c1 complex subunit 2, mitochondrial	Mus musculus
O70318	Epb41l2,Epb4.1l2	1.76467	0.819398	0.0155906	163.871	11	91	97	109.9	Band 4.1-like protein 2	Mus musculus
Q9CQA9	Ntpcr	1.76306	0.818084	0.214205	52.0372	2	18	18	20.7	Cancer-related nucleoside-triphosphatase homolog	Mus musculus
Q8BFU3	Rnf214	1.76132	0.816658	0.0292403		1	9	9	73.6	RING finger protein 214	Mus musculus
Q99L47	St13,Fam10a1,Hip	1.75898	0.814741	0.0132526	93.0161	6	53	56	41.7	Hsc70-interacting protein	Mus musculus
Q99MD9	Nasp	1.75896	0.814724	0.0877868	53.4941	2	16	16	84	Nuclear autoantigenic sperm protein	Mus musculus
Q8BY71	Hat1	1.7571	0.813195	0.0760145		1	9	9	49.3	Histone acetyltransferase type B catalytic subunit	Mus musculus
Q9JM99	Prg4,Msf,Szp	1.75646	0.812674	0.104247		1	9	15	116	Proteoglycan 4	Mus musculus
Q5SUF2	Luc7l3,Crop	1.75646	0.812673	0.00604348	114.581	8	64	80	51.5	Luc7-like protein 3	Mus musculus
P45591	Cfl2	1.75572	0.812062	0.371009	99.1907	1	16	16	18.7	Cofilin-2	Mus musculus
P28661	Sept4,Pnutl2	1.75282	0.809677	0.137582		1	9	9	54.9	Septin-4	Mus musculus
Q9QYC0	Add1	1.74747	0.805268	0.0293472	99.9517	3	27	27	80.6	Alpha-adducin	Mus musculus
Q07235	Serpine2,Pi7,Pn1,Spi4	1.74643	0.804411	0.0611386	78.7201	2	18	18	44.2	Glia-derived nexin	Mus musculus
Q8C5W3	Tbcel,Lrrc35	1.74469	0.802971	0.474015		1	9	9	48	Tubulin-specific chaperone cofactor E-like protein	Mus musculus
P59108	Cpne2	1.74397	0.802374	0.0313871	87.4559	4	32	47	61	Copine-2	Mus musculus
P51150	Rab7a,Rab7	1.7437	0.802148	0.0063908	119.063	8	71	71	23.5	Ras-related protein Rab-7a	Mus musculus
P35279	Rab6a,Rab6,MNCb-1660	1.74261	0.801253	0.549166		1	7	7	23.6	Ras-related protein Rab-6A	Mus musculus
Q8K411	Pitrm1,Kiaa1104,Ntup1	1.74154	0.800362	0.0337709		1	9	9	117.4	Presequence protease, mitochondrial	Mus musculus
Q9CPR5	Mrpl15	1.73802	0.797446	0.0309503	40.7371	3	27	27	33.5	39S ribosomal protein L15, mitochondrial	Mus musculus
Q9CPT5	Nop16,D13Wsu177e	1.73779	0.79725	0.00138474	141.903	14	152	167	21.1	Nucleolar protein 16	Mus musculus
Q9WUQ2	Preb,Sec12	1.73489	0.794847	0.0278182		1	9	16	45.4	Prolactin regulatory element-binding protein	Mus musculus
Q05186	Rcn1,Rca1,Rcn	1.73339	0.793596	0.0384623	117.637	4	38	38	38.1	Reticulocalbin-1	Mus musculus
Q7TMM9	Tubb2a,Tubb2	1.72977	0.790584	0.0754239	64.201	2	16	16	49.9	Tubulin beta-2A chain	Mus musculus
Q3UWW6	Gas2l3	1.72544	0.786963	0.0691389		1	9	9	74.2	GAS2-like protein 3	Mus musculus
P35123	Usp4,Unp	1.72383	0.78562	0.123198	134.882	3	25	25	108.3	Ubiquitin carboxyl-terminal hydrolase 4	Mus musculus
P63328	Ppp3ca,Calna	1.71802	0.780748	0.470166	358.142	3	36	36	58.6	Serine/threonine-protein phosphatase 2B catalytic subunit alpha isoform	Mus musculus
Q6PGB6	Naa50,Mak3,Nat13	1.71777	0.780536	0.244792	186.996	2	18	18	19.4	N-alpha-acetyltransferase 50	Mus musculus
Q3UKC1	Tax1bp1	1.7162	0.779215	0.00738231	54.9503	3	27	27	93.6	Tax1-binding protein 1 homolog	Mus musculus
A2AN08	Ubr4,Kiaa0462,Zubr1	1.71229	0.775923	0.00190826	86.8079	8	72	77	572.3	E3 ubiquitin-protein ligase UBR4	Mus musculus
O70479	Tnfaip1,Edp1	1.70667	0.77118	0.0051547	160.671	10	119	127	36.1	BTB/POZ domain-containing adapter for CUL3-mediated RhoA degradation protein 2	Mus musculus
Q3TZZ7	Esyt2,D12Ertd551e,Fam62b	1.70112	0.766481	0.162202	54.5754	2	18	18	94.1	Extended synaptotagmin-2	Mus musculus
Q9DBL1	Acadsb	1.70093	0.766325	0.0138136	114.531	6	51	51	47.9	Short/branched chain specific acyl-CoA dehydrogenase, mitochondrial	Mus musculus
Q62280	Ss18,Ssxt,Syt	1.69942	0.765041	0.0359006		1	9	9	45.9	Protein SSXT	Mus musculus
Q9CQF3	Nudt21,Cpsf5	1.6994	0.765024	0.0553249	79.9395	3	25	25	26.2	Cleavage and polyadenylation specificity factor subunit 5	Mus musculus
Q05512	Mark2,Emk	1.69706	0.763041	0.0272795	127.879	7	55	55	86.3	Serine/threonine-protein kinase MARK2	Mus musculus
Q8VEJ9	Vps4a	1.69657	0.762625	0.112317	66.5524	2	14	14	48.9	Vacuolar protein sorting-associated protein 4A	Mus musculus
Q9EQC5	Scyl1	1.69633	0.762418	0.0889433	168.908	6	43	43	89.2	N-terminal kinase-like protein	Mus musculus
Q6ZWY3	Rps27l	1.69392	0.760369	0.195738	227.562	3	45	45	9.5	40S ribosomal protein S27-like	Mus musculus
Q64511	Top2b	1.69093	0.757818	0.425769		1	7	7	181.9	DNA topoisomerase 2-beta	Mus musculus
Q922D4	Ppp6r3,D19Ertd703e,Kiaa1558,Pp6r3,Saps3	1.68915	0.756298	0.129708		1	9	9	94.7	Serine/threonine-protein phosphatase 6 regulatory subunit 3	Mus musculus
P10630	Eif4a2,Ddx2b	1.68708	0.754524	0.54766	152.929	2	6	9	46.4	Eukaryotic initiation factor 4A-II	Mus musculus
Q8CGB3	Uaca,Kiaa1561	1.68643	0.753971	0.0111222	154.752	10	89	89	160.8	Uveal autoantigen with coiled-coil domains and ankyrin repeats	Mus musculus
Q8CEE7	Rdh13	1.6846	0.752409	0.0246701	47.3679	2	18	18	36.5	Retinol dehydrogenase 13	Mus musculus
Q6NXH9	Krt73,Kb36	1.68424	0.752099	0.528689		1	9	9	58.9	Keratin, type II cytoskeletal 73	Mus musculus
P21126	Ubl4a,Gdx,Ubl4	1.68127	0.749554	0.0521942		1	9	9	17.8	Ubiquitin-like protein 4A	Mus musculus
O35350	Capn1,Canp1,Capa1	1.6792	0.747778	0.483479		1	9	9	82.1	Calpain-1 catalytic subunit	Mus musculus
Q9R0P9	Uchl1	1.67504	0.744193	0.250908	159.103	2	18	18	24.8	Ubiquitin carboxyl-terminal hydrolase isozyme L1	Mus musculus
P63028	Tpt1,Trt	1.6702	0.740018	0.410374		1	9	9	19.5	Translationally-controlled tumor protein	Mus musculus
Q7TMB8	Cyfip1,Kiaa0068,Shyc,Sra1	1.66793	0.738056	0.305635	235.045	4	28	28	145.2	Cytoplasmic FMR1-interacting protein 1	Mus musculus
O70503	Hsd17b12,Kik1	1.65795	0.729403	0.0360638	188.46	7	78	87	34.7	Very-long-chain 3-oxoacyl-CoA reductase	Mus musculus
Q62318	Trim28,Krip1,Tif1b	1.64928	0.721839	0.00252145	173.208	19	193	235	88.8	Transcription intermediary factor 1-beta	Mus musculus
P14685	Psmd3,P91a,Tstap91a	1.64815	0.720851	0.0185074	134.28	6	59	59	60.7	26S proteasome non-ATPase regulatory subunit 3	Mus musculus
Q8BG17	Nol12,Nop25	1.64636	0.719278	0.000761287	127.049	12	121	135	25.4	Nucleolar protein 12	Mus musculus
Q8BFZ9	Erlin2,Spfh2	1.64348	0.716754	0.0256577		1	9	9	37.9	Erlin-2	Mus musculus
O88512	Ap1g2	1.64142	0.714946	0.692981		1	7	7	87.9	AP-1 complex subunit gamma-like 2	Mus musculus
Q9QYB1	Clic4	1.63825	0.712155	0.180185		1	9	9	28.7	Chloride intracellular channel protein 4	Mus musculus
Q99KK2	Cmas	1.6368	0.710881	0.0106874	192.845	16	151	174	48.1	N-acylneuraminate cytidylyltransferase	Mus musculus
P97376	Frg1	1.63587	0.710058	0.00934695	169.449	13	126	135	29.1	Protein FRG1	Mus musculus
P61211	Arl1	1.63432	0.70869	0.295369	147.493	2	24	24	20.4	ADP-ribosylation factor-like protein 1	Mus musculus
Q8CH02	Sugp1,Sf4	1.63338	0.707863	0.280494		1	9	9	72.6	SURP and G-patch domain-containing protein 1	Mus musculus
Q9D0T1	Nhp2l1,Ssfa1	1.63263	0.707198	0.0118205	93.5462	3	36	50	14.2	NHP2-like protein 1	Mus musculus
Q02357	Ank1,Ank-1	1.63203	0.706671	0.195134		1	9	9	204.2	Ankyrin-1	Mus musculus
B2RS91	Rrn3	1.63176	0.706431	0.405499		1	5	5	74.5	RNA polymerase I-specific transcription initiation factor RRN3	Mus musculus
Q5SXY1	Specc1,Cytsb,Kiaa4061	1.62831	0.703371	0.00094021	200.903	27	251	271	118.1	Cytospin-B	Mus musculus
Q60932	Vdac1,Vdac5	1.62812	0.703209	0.0699166	163.904	6	52	52	32.4	Voltage-dependent anion-selective channel protein 1	Mus musculus
P62334	Psmc6,Sug2	1.6246	0.700082	0.14566	106.503	3	27	27	44.2	26S protease regulatory subunit 10B	Mus musculus
Q9CQH7	Btf3l4	1.622	0.697778	0.0584255		1	9	9	17.3	Transcription factor BTF3 homolog 4	Mus musculus
Q9WVB0	Rbpms,Hermes	1.61916	0.695247	0.425542		1	5	14	21.8	RNA-binding protein with multiple splicing	Mus musculus
P61982	Ywhag	1.61751	0.693776	0.0551116	136.729	6	70	70	28.3	14-3-3 protein gamma	Mus musculus
Q62446	Fkbp3,Fkbp25	1.61627	0.692668	0.172948	260.275	7	71	80	25.1	Peptidyl-prolyl cis-trans isomerase FKBP3	Mus musculus
Q9JHQ0	Anxa9	1.61622	0.692619	0.597007		1	9	9	38.1	Annexin A9	Mus musculus
Q60770	Stxbp3,Stxbp3a,Unc18c	1.61116	0.688103	0.131051		1	9	9	67.9	Syntaxin-binding protein 3	Mus musculus
Q9JII5	Dazap1	1.61016	0.687204	0.0287957		1	9	16	43.2	DAZ-associated protein 1	Mus musculus
P24860	Ccnb1,Ccn-2,Ccnb1-rs13,Cycb,Cycb1	1.60468	0.682289	0.525927		1	9	9	48.1	G2/mitotic-specific cyclin-B1	Mus musculus
Q61029	Tmpo,Lap2	1.59873	0.676925	0.00436174	151.814	13	133	142	50.4	Lamina-associated polypeptide 2, isoforms beta/delta/epsilon/gamma	Mus musculus
Q8BWY3	Etf1	1.59803	0.676298	0.0837482	37.2817	2	18	18	49	Eukaryotic peptide chain release factor subunit 1	Mus musculus
Q9D7P6	Iscu,Nifun	1.59799	0.676256	0.318312	252.777	3	25	25	18.1	Iron-sulfur cluster assembly enzyme ISCU, mitochondrial	Mus musculus
Q3U1T3	Brms1l	1.59642	0.674844	0.38999	229.694	5	34	34	37.7	Breast cancer metastasis-suppressor 1-like protein	Mus musculus
Q922H1	Prmt3,Hrmt1l3	1.59427	0.672894	0.242713	123.525	2	13	13	59.9	Protein arginine N-methyltransferase 3	Mus musculus
O35226	Psmd4,Mcb1	1.59398	0.672634	0.101724	121.884	4	34	34	40.7	26S proteasome non-ATPase regulatory subunit 4	Mus musculus
Q9CQ69	Uqcrq	1.59312	0.671854	0.153279	132.648	2	18	18	9.8	Cytochrome b-c1 complex subunit 8	Mus musculus
Q8BU14	Sec62,Tloc1	1.59176	0.670626	0.153117		1	9	9	45.6	Translocation protein SEC62	Mus musculus
P97386	Lig3	1.59165	0.670523	0.0211614	101.145	4	32	32	113.1	DNA ligase 3	Mus musculus
Q9DC70	Ndufs7	1.58674	0.666066	0.177593		1	9	9	24.7	NADH dehydrogenase [ubiquinone] iron-sulfur protein 7, mitochondrial	Mus musculus
Q9CU62	Smc1a,Sb1.8,Smc1,Smc1l1,Smcb	1.58659	0.665927	0.231057		1	9	9	143.2	Structural maintenance of chromosomes protein 1A	Mus musculus
Q9D8U3	Erp27	1.58574	0.665153	0.0589314		1	9	9	30.7	Endoplasmic reticulum resident protein 27	Mus musculus
Q6PIX5	Rhbdf1,Dist1,Irhom1,Kiaa4242	1.58412	0.663686	0.36929	251.71	3	26	26	97.3	Inactive rhomboid protein 1	Mus musculus
Q8CGC7	Eprs,Qprs	1.58374	0.663332	8.99895e-05	192.746	37	360	388	170.1	Bifunctional glutamate/proline--tRNA ligase	Mus musculus
Q9CR11	Yeats4	1.58162	0.661401	0.0946696	61.8538	3	26	26	26.5	YEATS domain-containing protein 4	Mus musculus
P83940	Tceb1	1.58114	0.660962	0.233997	176.634	3	22	22	12.5	Transcription elongation factor B polypeptide 1	Mus musculus
Q8BH57	Wdr48,Kiaa1449,Uaf1	1.58052	0.660404	0.276053	123.18	2	17	17	76	WD repeat-containing protein 48	Mus musculus
Q8BR65	Suds3,Sds3	1.57966	0.659615	0.145338	256.262	10	84	84	38.1	Sin3 histone deacetylase corepressor complex component SDS3	Mus musculus
Q91WS0	Cisd1,D10Ertd214e,Zcd1	1.57691	0.657105	0.206225		1	9	9	12.1	CDGSH iron-sulfur domain-containing protein 1	Mus musculus
Q8CGC6	Rbm28	1.57623	0.656482	0.145654	198.917	5	45	45	84.2	RNA-binding protein 28	Mus musculus
Q8BTV2	Cpsf7	1.57017	0.650925	0.00782438	50.2012	4	32	32	52	Cleavage and polyadenylation specificity factor subunit 7	Mus musculus
P49935	Ctsh	1.56767	0.648623	0.425769	292.329	2	14	14	37.2	Pro-cathepsin H	Mus musculus
Q60520	Sin3a,Kiaa4126	1.56726	0.648241	0.00355511	247.665	28	277	286	145.1	Paired amphipathic helix protein Sin3a	Mus musculus
Q8BWZ3	Naa25,Mdm20	1.56722	0.648204	0.661304		1	7	7	111.7	N-alpha-acetyltransferase 25, NatB auxiliary subunit	Mus musculus
Q00899	Yy1,Ucrbp	1.56539	0.646525	0.125965		1	9	9	44.7	Transcriptional repressor protein YY1	Mus musculus
O08796	Eef2k	1.56158	0.643007	0.201222		1	8	8	81.7	Eukaryotic elongation factor 2 kinase	Mus musculus
Q9D0J8	Ptms	1.56069	0.642187	0.444905		1	9	17	11.4	Parathymosin	Mus musculus
P27546	Map4,Mtap4	1.56039	0.641906	5.99318e-05	221.779	39	430	453	117.4	Microtubule-associated protein 4	Mus musculus
Q9D880	Timm50,Tim50	1.55816	0.639847	0.0122226		1	9	9	39.8	Mitochondrial import inner membrane translocase subunit TIM50	Mus musculus
Q99PL6	Ubxn6,Ubxd1,Ubxdc2	1.55591	0.637762	0.340832	130.52	2	12	12	49.8	UBX domain-containing protein 6	Mus musculus
O55131	Sept7,Cdc10	1.55571	0.63757	0.0349428	135.811	7	73	80	50.5	Septin-7	Mus musculus
Q9DBZ5	Eif3k,Eif3s12	1.55405	0.636033	0.628952	308.26	2	15	15	25.1	Eukaryotic translation initiation factor 3 subunit K	Mus musculus
P56960	Exosc10,Pmscl2	1.55268	0.634756	0.146901		1	9	9	100.9	Exosome component 10	Mus musculus
Q8C570	Rae1,Mrnp41	1.55199	0.634115	0.0877099	307.955	13	171	201	41	mRNA export factor	Mus musculus
P59235	Nup43	1.5509	0.633109	0.122294		1	9	9	42	Nucleoporin Nup43	Mus musculus
Q9CSN1	Snw1,Skiip	1.54865	0.631011	0.00124714	144.493	17	156	156	61.5	SNW domain-containing protein 1	Mus musculus
Q9DBG6	Rpn2	1.54477	0.627393	0.0268558	66.7997	5	50	50	69.1	Dolichyl-diphosphooligosaccharide--protein glycosyltransferase subunit 2	Mus musculus
Q9CXY6	Ilf2,Nf45	1.5437	0.626396	0.20979	90.1421	2	18	33	43.1	Interleukin enhancer-binding factor 2	Mus musculus
Q8JZM7	Cdc73	1.54247	0.625243	0.199625		1	9	9	60.6	Parafibromin	Mus musculus
Q9Z2Q5	Mrpl40,Nlvcf	1.54014	0.623059	0.145911		1	9	9	24.3	39S ribosomal protein L40, mitochondrial	Mus musculus
Q9JLB2	Mpp5,Pals1	1.53491	0.61815	0.112388	143.697	6	39	48	77.2	MAGUK p55 subfamily member 5	Mus musculus
P60843	Eif4a1,Ddx2a,Eif4a	1.53405	0.617345	0.0826688	242.5	11	117	132	46.2	Eukaryotic initiation factor 4A-I	Mus musculus
Q64378	Fkbp5,Fkbp51	1.53233	0.615728	0.152067	195.532	5	44	44	51	Peptidyl-prolyl cis-trans isomerase FKBP5	Mus musculus
Q78ZA7	Nap1l4	1.53134	0.614798	0.326461		1	8	13	42.7	Nucleosome assembly protein 1-like 4	Mus musculus
Q8R4N0	Clybl,Clb	1.53091	0.614393	0.731403		1	5	5	37.5	Citrate lyase subunit beta-like protein, mitochondrial	Mus musculus
Q689Z5	Sbno1,Sno1	1.53075	0.614243	0.174339		1	9	9	153.7	Protein strawberry notch homolog 1	Mus musculus
Q9CQP0	Mrpl33	1.52661	0.610335	0.0877099	149.405	3	36	36	7.4	39S ribosomal protein L33, mitochondrial	Mus musculus
P31230	Aimp1,Emap2,Scye1	1.52579	0.609559	0.412431	215.024	3	24	31	34	Aminoacyl tRNA synthase complex-interacting multifunctional protein 1	Mus musculus
Q8BQM4	Heatr3	1.52497	0.608778	0.0348098		1	9	9	74.3	HEAT repeat-containing protein 3	Mus musculus
Q5SFM8	Rbm27,Kiaa1311	1.52332	0.607215	0.104247	218.298	8	72	72	118.6	RNA-binding protein 27	Mus musculus
Q9DBE9	Ftsj3	1.52212	0.606085	0.00421675	266.613	34	351	355	95.5	pre-rRNA processing protein FTSJ3	Mus musculus
Q9Z1T1	Ap3b1	1.52153	0.60552	0.0134814	108.724	7	60	67	122.7	AP-3 complex subunit beta-1	Mus musculus
Q61827	Mafk,Nfe2u	1.52088	0.604909	0.23333	295.488	7	68	68	17.5	Transcription factor MafK	Mus musculus
P60762	Morf4l1,Mrg15,Tex189	1.51984	0.60392	0.138606	138.742	3	26	26	41.5	Mortality factor 4-like protein 1	Mus musculus
Q9D1I6	Mrpl14	1.51949	0.603584	0.0816566	173.26	6	54	54	15.9	39S ribosomal protein L14, mitochondrial	Mus musculus
Q7TPC1	Cdsn	1.51873	0.602863	0.674678		1	9	9	54.3	Corneodesmosin	Mus musculus
P81122	Irs2	1.5187	0.602834	0.387287	309.493	4	28	28	136.8	Insulin receptor substrate 2	Mus musculus
P10639	Txn,Txn1	1.51833	0.602483	0.073182		1	9	9	11.7	Thioredoxin	Mus musculus
Q9R1P4	Psma1	1.51733	0.60153	0.152079	95.3473	2	18	18	29.5	Proteasome subunit alpha type-1	Mus musculus
A6H5X4	Phf11,D14Ertd668e,Phf11d,Phf11l	1.51418	0.598537	0.628503		1	9	9	37.7	PHD finger protein 11	Mus musculus
P32020	Scp2,Scp-2	1.50572	0.590454	0.494711		1	9	9	59.1	Non-specific lipid-transfer protein	Mus musculus
Q52KI8	Srrm1,Pop101	1.50531	0.590063	0.106067	363.834	17	197	206	106.9	Serine/arginine repetitive matrix protein 1	Mus musculus
Q61699	Hsph1,Hsp105,Hsp110,Kiaa0201	1.50207	0.586954	0.00149236	199.083	24	261	297	96.4	Heat shock protein 105 kDa	Mus musculus
Q5F201	Cfap52,Wdr16	1.50186	0.586748	0.514059		1	7	7	68.2	Cilia- and flagella-associated protein 52	Mus musculus
P46662	Nf2,Nf-2	1.5006	0.585536	0.71206	607.128	2	17	17	69.8	Merlin	Mus musculus
Q922Q8	Lrrc59	1.49948	0.584464	0.247915	311.859	10	84	106	34.9	Leucine-rich repeat-containing protein 59	Mus musculus
Q9D4H1	Exoc2,Sec5,Sec5l1	1.49357	0.578767	0.63992		1	9	18	104	Exocyst complex component 2	Mus musculus
P50518	Atp6v1e1,Atp6e,Atp6e2	1.48976	0.575078	0.547804	477.641	5	39	39	26.2	V-type proton ATPase subunit E 1	Mus musculus
Q8R0K4	Ccdc137	1.4884	0.573765	0.265945		1	9	9	32.9	Coiled-coil domain-containing protein 137	Mus musculus
Q8CJ96	Rassf8	1.48733	0.572724	0.416255	310.292	3	27	27	48.1	Ras association domain-containing protein 8	Mus musculus
Q3THK3	Gtf2f1	1.48702	0.572429	0.201372	141.252	4	31	31	57.2	General transcription factor IIF subunit 1	Mus musculus
Q9CZU4	Eral1,Mera	1.48407	0.569562	0.405728	273.293	3	27	27	48.2	GTPase Era, mitochondrial	Mus musculus
P18155	Mthfd2,Nmdmc	1.4839	0.569398	0.050772	147.855	6	49	58	37.9	Bifunctional methylenetetrahydrofolate dehydrogenase/cyclohydrolase, mitochondrial	Mus musculus
P60335	Pcbp1	1.481	0.566574	0.0997936	113.375	6	53	68	37.5	Poly(rC)-binding protein 1	Mus musculus
Q9D0I9	Rars	1.47853	0.564165	0.104889	271.82	12	110	134	75.7	Arginine--tRNA ligase, cytoplasmic	Mus musculus
Q8BJL0	Smarcal1,Harp	1.4765	0.562181	0.299625	91.1347	2	17	17	100.8	SWI/SNF-related matrix-associated actin-dependent regulator of chromatin subfamily A-like protein 1	Mus musculus
Q99M51	Nck1	1.47545	0.561151	0.12247	112.798	3	24	24	42.9	Cytoplasmic protein NCK1	Mus musculus
Q9DBG7	Srpr	1.4753	0.561007	0.0144787	67.5531	5	45	52	69.6	Signal recognition particle receptor subunit alpha	Mus musculus
Q7TSG5	Sh3d21	1.47423	0.55996	0.0512407		1	9	9	60.3	SH3 domain-containing protein 21	Mus musculus
Q9EPV8	Ubl5	1.4733	0.559052	0.184848		1	9	9	8.5	Ubiquitin-like protein 5	Mus musculus
Q80TI1	Plekhh1,Kiaa1200	1.47311	0.558866	0.580798		1	4	4	150.9	Pleckstrin homology domain-containing family H member 1	Mus musculus
Q99P72	Rtn4,Kiaa0886,Nogo	1.47295	0.558705	0.488001	208.401	2	14	14	126.6	Reticulon-4	Mus musculus
Q8BMA6	Srp68	1.47156	0.557351	0.216315	271.233	8	69	84	70.6	Signal recognition particle subunit SRP68	Mus musculus
A2AGT5	Ckap5	1.47134	0.557126	0.0226083	102.647	9	78	78	225.6	Cytoskeleton-associated protein 5	Mus musculus
Q8K4Z5	Sf3a1	1.47053	0.556332	0.271842	393.324	11	109	109	88.5	Splicing factor 3A subunit 1	Mus musculus
Q8JZS6	N4bp2l2,Pfaap5	1.46942	0.555251	0.54273		1	9	9	66.3	NEDD4-binding protein 2-like 2	Mus musculus
Q60931	Vdac3	1.46854	0.554382	0.144419	199.267	5	48	54	30.8	Voltage-dependent anion-selective channel protein 3	Mus musculus
P08775	Polr2a,Rpii215,Rpo2-1	1.46816	0.554008	0.101982	220.329	8	63	72	217.2	DNA-directed RNA polymerase II subunit RPB1	Mus musculus
Q99JI4	Psmd6	1.46548	0.551369	0.104424	167.995	5	45	45	45.5	26S proteasome non-ATPase regulatory subunit 6	Mus musculus
Q8BH59	Slc25a12,Aralar1	1.46497	0.550874	0.0462146	163.836	6	62	62	74.6	Calcium-binding mitochondrial carrier protein Aralar1	Mus musculus
Q9D1D4	Tmed10,Tmp21	1.46428	0.550193	0.546526	406.647	5	38	38	24.9	Transmembrane emp24 domain-containing protein 10	Mus musculus
Q5BLK4	Zcchc6,Kiaa1711,Tut7	1.46054	0.546502	0.335603	175.756	2	18	18	169.1	Terminal uridylyltransferase 7	Mus musculus
Q6A068	Cdc5l,Kiaa0432	1.45668	0.54268	0.0416099	202.983	13	113	113	92.2	Cell division cycle 5-like protein	Mus musculus
Q9CQQ7	Atp5f1	1.45588	0.541895	0.554626	456.97	5	42	42	28.9	ATP synthase F(0) complex subunit B1, mitochondrial	Mus musculus
Q6ZWV7	Rpl35	1.45535	0.541368	0.20616	540.638	20	265	292	14.6	60S ribosomal protein L35	Mus musculus
Q99P25	Tsnaxip1,Txi1	1.45483	0.540847	0.703724		1	8	8	81.8	Translin-associated factor X-interacting protein 1	Mus musculus
Q8BRT1	Clasp2,Kiaa0627	1.45309	0.539129	0.168686		1	9	9	140.7	CLIP-associating protein 2	Mus musculus
P35550	Fbl	1.45108	0.537124	0.0867131	381.028	22	237	251	34.3	rRNA 2'-O-methyltransferase fibrillarin	Mus musculus
P28656	Nap1l1,Nrp	1.4505	0.536546	0.723978	531.696	2	12	12	45.3	Nucleosome assembly protein 1-like 1	Mus musculus
O89032	Sh3pxd2a,Fish,Sh3md1,Tks5	1.44862	0.534675	0.228212		1	9	9	124.2	SH3 and PX domain-containing protein 2A	Mus musculus
Q91YQ5	Rpn1	1.4484	0.534463	0.138623	274.402	9	106	125	68.5	Dolichyl-diphosphooligosaccharide--protein glycosyltransferase subunit 1	Mus musculus
Q9CYI4	Luc7l	1.44693	0.532998	0.088852	111.271	5	35	35	43.9	Putative RNA-binding protein Luc7-like 1	Mus musculus
Q7TNP2	Ppp2r1b	1.4465	0.532569	0.429273	148.526	2	12	12	65.9	Serine/threonine-protein phosphatase 2A 65 kDa regulatory subunit A beta isoform	Mus musculus
Q922M3	Kctd10	1.44471	0.53078	0.278055	348.543	7	87	135	35.7	BTB/POZ domain-containing adapter for CUL3-mediated RhoA degradation protein 3	Mus musculus
Q9JI57	Gtf2ird1,Ben	1.4441	0.530174	0.00722508	323.562	38	426	462	123.5	General transcription factor II-I repeat domain-containing protein 1	Mus musculus
P29416	Hexa	1.44355	0.529624	0.12762		1	9	9	60.6	Beta-hexosaminidase subunit alpha	Mus musculus
Q9D8X2	Ccdc124	1.44302	0.529092	0.135626	315.648	13	140	148	25.3	Coiled-coil domain-containing protein 124	Mus musculus
Q8K019	Bclaf1,Btf,Kiaa0164	1.44233	0.528401	0.00119475	244.619	29	349	349	106	Bcl-2-associated transcription factor 1	Mus musculus
Q5U405	Tmprss13,Msp	1.4418	0.527868	0.39113		1	8	8	59.8	Transmembrane protease serine 13	Mus musculus
Q8R1Q8	Dync1li1,Dncli1,Dnclic1	1.44005	0.526114	0.256056	40.7997	2	18	18	56.6	Cytoplasmic dynein 1 light intermediate chain 1	Mus musculus
Q9DA08	Ccdc101,Sgf29	1.43927	0.525333	0.316311		1	9	9	33.3	SAGA-associated factor 29	Mus musculus
P0C0S6	H2afz,H2az	1.43923	0.525297	0.804996		1	3	3	13.6	Histone H2A.Z	Mus musculus
A2A3V1	Akap17b,Sfrs17b	1.43893	0.524996	0.831193	883.028	2	13	13	111.1	A-kinase anchor protein 17B	Mus musculus
Q6ZPE2	Sbf1,Kiaa3020,Mtmr5	1.43882	0.524888	0.0588553	187.864	11	89	89	208.7	Myotubularin-related protein 5	Mus musculus
Q9CQM5	Txndc17,Txnl5	1.43724	0.523304	0.702431		1	8	8	14	Thioredoxin domain-containing protein 17	Mus musculus
Q9CY27	Tecr,Gpsn2	1.43612	0.522172	0.246685	293.818	5	58	58	36.1	Very-long-chain enoyl-CoA reductase	Mus musculus
Q9Z0N1	Eif2s3x	1.43408	0.52013	0.0368061	70.6211	3	34	34	51.1	Eukaryotic translation initiation factor 2 subunit 3, X-linked	Mus musculus
Q9Z1J3	Nfs1,Nifs	1.43404	0.520083	0.26682	75.3651	2	18	18	50.6	Cysteine desulfurase, mitochondrial	Mus musculus
P17156	Hspa2,Hcp70.2,Hsp70-2	1.43272	0.518753	0.387287	267.429	4	34	34	69.6	Heat shock-related 70 kDa protein 2	Mus musculus
Q9D8W5	Psmd12	1.43094	0.516964	0.0753468	263.293	12	90	96	52.9	26S proteasome non-ATPase regulatory subunit 12	Mus musculus
Q62151	Ager,Rage	1.42571	0.511683	0.379889	68.9457	2	18	18	42.7	Advanced glycosylation end product-specific receptor	Mus musculus
Q52KF3	Spire1	1.42293	0.508868	0.39883		1	9	9	68.5	Protein spire homolog 1	Mus musculus
Q9CXF7	Chd1l	1.42232	0.508245	0.151821		1	9	9	101.4	Chromodomain-helicase-DNA-binding protein 1-like	Mus musculus
Q4V9W2	Srek1ip1,Sfrs12ip1	1.41967	0.505558	0.737344	637.344	2	18	18	18.2	Protein SREK1IP1	Mus musculus
P08113	Hsp90b1,Grp94,Tra-1,Tra1	1.41867	0.504534	0.101219	242.646	12	107	114	92.5	Endoplasmin	Mus musculus
O55029	Copb2	1.41663	0.502464	0.638795	232.395	2	12	18	102.4	Coatomer subunit beta'	Mus musculus
Q62141	Sin3b,Kiaa0700	1.41633	0.502153	0.175935	290.568	10	92	99	126.4	Paired amphipathic helix protein Sin3b	Mus musculus
A2ASS6	Ttn	1.41342	0.499192	0.655005		1	9	16	3906.5	Titin	Mus musculus
Q9CPQ1	Cox6c	1.41283	0.498589	0.486128		1	9	9	8.5	Cytochrome c oxidase subunit 6C	Mus musculus
Q61598	Gdi2,Gdi3	1.41091	0.49663	0.44718		1	5	5	50.5	Rab GDP dissociation inhibitor beta	Mus musculus
Q922P9	Glyr1,Np60	1.41065	0.496365	0.0963463	117.855	4	36	44	59.7	Putative oxidoreductase GLYR1	Mus musculus
Q8K2T8	Paf1	1.40959	0.495277	0.363145	204.418	2	15	15	60.5	RNA polymerase II-associated factor 1 homolog	Mus musculus
Q61753	Phgdh	1.40927	0.49495	0.196916	269.71	7	62	62	56.6	D-3-phosphoglycerate dehydrogenase	Mus musculus
Q7TPH6	Mycbp2,Pam,Phr1	1.40621	0.491809	2.08008e-06	475.457	233	2637	3149	517.7	E3 ubiquitin-protein ligase MYCBP2	Mus musculus
Q8C1B1	Camsap2,Camsap1l1,Kiaa1078	1.4058	0.491392	0.52324	299.036	2	17	17	164.3	Calmodulin-regulated spectrin-associated protein 2	Mus musculus
A2A8L1	Chd5,Kiaa0444	1.40456	0.490122	0.122733	83.172	2	14	20	222.5	Chromodomain-helicase-DNA-binding protein 5	Mus musculus
Q8BMJ3	Eif1ax,Eif1ay	1.40413	0.489677	0.774935	236.273	2	4	4	16.5	Eukaryotic translation initiation factor 1A, X-chromosomal	Mus musculus
P18826	Phka1	1.40289	0.488403	0.580643		1	9	9	138.8	Phosphorylase b kinase regulatory subunit alpha, skeletal muscle isoform	Mus musculus
Q8C850	Scara3	1.40289	0.488403	0.580643		1	9	9	65.5	Scavenger receptor class A member 3	Mus musculus
Q9D358	Acp1	1.40166	0.487141	0.008689		1	9	9	18.2	Low molecular weight phosphotyrosine protein phosphatase	Mus musculus
Q9D0P8	Ift27,Rabl4,Rayl	1.40041	0.485851	0.517445		1	3	3	20.8	Intraflagellar transport protein 27 homolog	Mus musculus
P10107	Anxa1,Anx1,Lpc-1,Lpc1	1.39969	0.485112	0.101592	282.099	12	122	127	38.7	Annexin A1	Mus musculus
Q9WVA3	Bub3	1.39693	0.482261	0.0707637		1	9	9	37	Mitotic checkpoint protein BUB3	Mus musculus
Q8R4P9	Abcc10,Mrp7	1.39674	0.482065	0.703704		1	7	7	163.7	Multidrug resistance-associated protein 7	Mus musculus
Q8BM39	Prpf18,Prp18	1.39632	0.481627	0.311775		1	9	9	39.9	Pre-mRNA-splicing factor 18	Mus musculus
Q3UZ39	Lrrfip1,Flap	1.39542	0.480694	0.275271	250.221	5	45	45	79.2	Leucine-rich repeat flightless-interacting protein 1	Mus musculus
Q99LB0	Dnttip1,Tdif1	1.3938	0.479025	0.247725	240.297	6	58	67	36.9	Deoxynucleotidyltransferase terminal-interacting protein 1	Mus musculus
Q91VY9	Znf622,D15Ertd806e,Zfp622	1.39279	0.477979	0.179921	167.422	6	42	42	53.5	Zinc finger protein 622	Mus musculus
P35278	Rab5c	1.39247	0.477643	0.488506	187.997	3	16	16	23.4	Ras-related protein Rab-5C	Mus musculus
P62806	Hist1h4a,Hist1h4b,H4-53,Hist1h4c,H4-12,Hist1h4d,Hist1h4f,Hist1h4h,Hist1h4i,Hist1h4j,Hist1h4k,Hist1h4m,Hist2h4a,Hist2h4,Hist4h4	1.39193	0.477091	0.356674	372.474	9	80	89	11.4	Histone H4	Mus musculus
Q9JJH7	Trpm5,Ltrpc5,Mtr1	1.39074	0.475852	0.785508		1	6	6	130.8	Transient receptor potential cation channel subfamily M member 5	Mus musculus
Q9CXU0	Med10,D13Wsu50e	1.39053	0.475633	0.693893	504.851	3	22	22	15.7	Mediator of RNA polymerase II transcription subunit 10	Mus musculus
O54836	Zmat3,Pag608,Wig1	1.38616	0.471095	0.587789		1	8	8	32	Zinc finger matrin-type protein 3	Mus musculus
Q3TIX9	Usp39	1.38506	0.469944	0.123582	162.632	6	52	52	65.1	U4/U6.U5 tri-snRNP-associated protein 2	Mus musculus
P97429	Anxa4,Anx4	1.38468	0.469555	0.486128		1	9	9	35.9	Annexin A4	Mus musculus
Q8VH51	Rbm39,Caper,Rnpc2	1.38411	0.468954	0.223044	368.163	16	136	162	59.4	RNA-binding protein 39	Mus musculus
O88746	Tom1	1.38128	0.466001	0.379816		1	8	8	54.3	Target of Myb protein 1	Mus musculus
Q91V81	Rbm42	1.37818	0.462764	0.548121		1	9	9	49.9	RNA-binding protein 42	Mus musculus
Q99PU7	Bap1,Kiaa0272	1.37244	0.456741	0.657531	602.934	5	42	47	80.5	Ubiquitin carboxyl-terminal hydrolase BAP1	Mus musculus
Q9QXP6	Mkrn1	1.37117	0.455407	0.14965		1	9	9	53	E3 ubiquitin-protein ligase makorin-1	Mus musculus
Q8VEM8	Slc25a3	1.36957	0.453719	0.266671	347.423	9	95	124	39.6	Phosphate carrier protein, mitochondrial	Mus musculus
Q80YS5	Lrrc27	1.36909	0.453221	0.393677		1	9	9	59.9	Leucine-rich repeat-containing protein 27	Mus musculus
P98192	Gnpat,Dhapat	1.36908	0.453206	0.24125		1	8	8	76.9	Dihydroxyacetone phosphate acyltransferase	Mus musculus
O35593	Psmd14,Pad1	1.36774	0.451797	0.444905	112.973	2	16	16	34.6	26S proteasome non-ATPase regulatory subunit 14	Mus musculus
Q9DAL3	Ccdc54	1.36761	0.451657	0.123582		1	9	9	37.5	Coiled-coil domain-containing protein 54	Mus musculus
Q9DAA6	Exosc1,Csl4	1.36545	0.449375	0.204684		1	9	9	21.4	Exosome complex component CSL4	Mus musculus
Q3UV17	Krt76	1.36518	0.449091	0.540743	208.076	2	27	27	62.8	Keratin, type II cytoskeletal 2 oral	Mus musculus
Q9CWM4	Pfdn1	1.36451	0.448384	0.379079	233.342	2	18	18	14.3	Prefoldin subunit 1	Mus musculus
Q9JM93	Arl6ip4	1.36118	0.444856	0.100241	345.553	15	167	167	25.5	ADP-ribosylation factor-like protein 6-interacting protein 4	Mus musculus
O88271	Cfdp1,Bcnt,Cfdp,Cp27	1.36054	0.444178	0.322722	233.361	3	35	58	32.9	Craniofacial development protein 1	Mus musculus
P49717	Mcm4,Cdc21,Mcmd4	1.35782	0.441295	0.587047		1	9	9	96.7	DNA replication licensing factor MCM4	Mus musculus
Q62189	Snrpa,Rnu1a-1	1.35704	0.440463	0.314289		1	9	17	31.8	U1 small nuclear ribonucleoprotein A	Mus musculus
Q9EQI8	Mrpl46	1.35698	0.440399	0.0951609	145.122	4	36	36	32.1	39S ribosomal protein L46, mitochondrial	Mus musculus
Q810A7	Ddx42	1.35694	0.440352	0.0664727	136.202	6	52	52	102	ATP-dependent RNA helicase DDX42	Mus musculus
Q62241	Snrpc,Snrp1c	1.35616	0.439527	0.647633	437.719	3	25	25	17.4	U1 small nuclear ribonucleoprotein C	Mus musculus
O35594	Ift81,Cdv-1,Cdv1	1.35593	0.439281	0.140384		1	9	9	79.3	Intraflagellar transport protein 81 homolog	Mus musculus
Q80TM9	Nisch,Kiaa0975	1.35558	0.438912	0.280745	187.329	6	41	41	175	Nischarin	Mus musculus
Q9DCL9	Paics	1.35464	0.437912	0.296151	279.488	6	51	51	47	Multifunctional protein ADE2	Mus musculus
P35700	Prdx1,Msp23,Paga,Tdpx2	1.35126	0.434306	0.432338	370.218	7	58	73	22.2	Peroxiredoxin-1	Mus musculus
P62889	Rpl30	1.35067	0.433671	0.377783	259.257	5	41	41	12.8	60S ribosomal protein L30	Mus musculus
Q9CQJ6	Denr	1.34943	0.432346	0.215894	134.497	3	27	27	22.2	Density-regulated protein	Mus musculus
P35545	Fau	1.34885	0.431731	0.3137		1	9	9	7.8	Ubiquitin-like protein FUBI	Mus musculus
Q9D1J3	Sarnp,Hcc1	1.34787	0.430683	0.217206	348.532	11	107	116	23.5	SAP domain-containing ribonucleoprotein	Mus musculus
P47743	Grm8,Gprc1h,Mglur8	1.34687	0.429607	0.416255		1	9	9	101.8	Metabotropic glutamate receptor 8	Mus musculus
Q6DFW4	Nop58,Nol5	1.34412	0.426661	0.0950129	316.919	17	180	192	60.3	Nucleolar protein 58	Mus musculus
Q6ZWR6	Syne1	1.34308	0.425549	0.657531	368.855	2	12	12	1009.9	Nesprin-1	Mus musculus
Q8C3F2	Fam120c,ORF34	1.34187	0.424247	0.0421501	250.154	19	172	193	119.7	Constitutive coactivator of PPAR-gamma-like protein 2	Mus musculus
P51410	Rpl9	1.34165	0.424003	0.295369	453.208	16	136	166	21.9	60S ribosomal protein L9	Mus musculus
Q80US4	Actr5	1.34047	0.422735	0.833276		1	3	3	67.8	Actin-related protein 5	Mus musculus
O35841	Api5	1.34035	0.422614	0.301433	359.095	6	70	88	56.8	Apoptosis inhibitor 5	Mus musculus
Q9JJF3	No66,Mapjd,MNCb-7109	1.33883	0.42097	0.254686	86.5356	2	18	18	67.6	Ribosomal oxygenase 1	Mus musculus
Q497V5	Srbd1	1.33879	0.420927	0.0619299	217.172	11	105	113	114.1	S1 RNA-binding domain-containing protein 1	Mus musculus
Q148A4	Ppp1r32	1.33869	0.420824	0.319454		1	9	9	47.8	Protein phosphatase 1 regulatory subunit 32	Mus musculus
A6PWY4	Wdr76	1.33841	0.420518	0.205475		1	7	7	69	WD repeat-containing protein 76	Mus musculus
Q9CXW2	Mrps22,Rpms22	1.33707	0.419076	0.195157		1	9	9	41.2	28S ribosomal protein S22, mitochondrial	Mus musculus
Q9CPW5	Ssr2	1.33527	0.417136	0.201351		1	9	9	20	Translocon-associated protein subunit beta	Mus musculus
Q9Z2N8	Actl6a,Actl6,Baf53a	1.3352	0.417054	0.255907	84.0347	2	36	42	47.4	Actin-like protein 6A	Mus musculus
O08532	Cacna2d1,Cacna2	1.33375	0.415485	0.788941		1	7	7	124.6	Voltage-dependent calcium channel subunit alpha-2/delta-1	Mus musculus
P20444	Prkca,Pkca	1.33349	0.415211	0.692981		1	7	7	76.9	Protein kinase C alpha type	Mus musculus
A2ALW5	Dnajc25	1.33284	0.414506	0.500629	300.718	2	18	18	41.9	DnaJ homolog subfamily C member 25	Mus musculus
Q924W7	St5,Dennd2b	1.33127	0.412804	0.495986		1	9	9	126.9	Suppression of tumorigenicity 5 protein	Mus musculus
Q8BG32	Psmd11	1.33107	0.412585	0.120095	274.539	12	111	144	47.4	26S proteasome non-ATPase regulatory subunit 11	Mus musculus
P43406	Itgav	1.32935	0.410723	0.193417		1	9	12	115.4	Integrin alpha-V	Mus musculus
P16254	Srp14	1.32573	0.406783	0.199625	104.644	2	27	27	12.5	Signal recognition particle 14 kDa protein	Mus musculus
Q9CYG7	Tomm34	1.32451	0.405459	0.594057	550.774	6	52	52	34.3	Mitochondrial import receptor subunit TOM34	Mus musculus
Q6P9K9	Nrxn3	1.32207	0.402801	0.451285		1	9	9	173.4	Neurexin-3	Mus musculus
Q8K1K6	Serpinb10	1.32118	0.401828	0.342989		1	9	9	45.1	Serpin B10	Mus musculus
Q9WVK4	Ehd1,Past1	1.32098	0.401604	0.29825	331.604	8	77	89	60.6	EH domain-containing protein 1	Mus musculus
P70398	Usp9x,Fafl,Fam	1.31862	0.399024	0.0653937	275.783	18	164	173	290.7	Probable ubiquitin carboxyl-terminal hydrolase FAF-X	Mus musculus
Q8BLR5	Psd4	1.31662	0.396838	0.431719		1	9	9	112.7	PH and SEC7 domain-containing protein 4	Mus musculus
Q99M04	Lias,Lip1	1.3163	0.396491	0.420151	297.605	4	34	34	41.9	Lipoyl synthase, mitochondrial	Mus musculus
Q64362	Aktip,Fif,Ft1,Fts	1.31523	0.39532	0.758363		1	6	6	32.9	AKT-interacting protein	Mus musculus
Q8CFI7	Polr2b	1.31489	0.394938	0.462751	415.992	7	53	61	133.9	DNA-directed RNA polymerase II subunit RPB2	Mus musculus
Q8K1G2	Evc2,Lbn	1.31429	0.394283	0.261097		1	9	9	137.6	Limbin	Mus musculus
Q9QY76	Vapb	1.31246	0.392271	0.154793	150.528	3	36	36	26.9	Vesicle-associated membrane protein-associated protein B	Mus musculus
P62137	Ppp1ca,Ppp1a	1.31194	0.391703	0.486885	356.46	4	36	36	37.5	Serine/threonine-protein phosphatase PP1-alpha catalytic subunit	Mus musculus
Q9QWH1	Phc2,Edr2,Ph2	1.31175	0.391495	0.0808476	82.1848	2	18	18	89.8	Polyhomeotic-like protein 2	Mus musculus
P19783	Cox4i1,Cox4,Cox4a	1.31166	0.391391	0.674441	387.95	2	15	15	19.5	Cytochrome c oxidase subunit 4 isoform 1, mitochondrial	Mus musculus
Q8BP48	Metap1	1.3113	0.391001	0.538117		1	9	9	43.2	Methionine aminopeptidase 1	Mus musculus
Q4VBF2	R3hdm4	1.3106	0.39023	0.462751	258.729	4	32	32	29.7	R3H domain-containing protein 4	Mus musculus
Q62511	Zfp91,Pzf	1.30896	0.388425	0.495772		1	9	9	63.4	E3 ubiquitin-protein ligase ZFP91	Mus musculus
Q8CDN6	Txnl1,Trp32,Txnl	1.30776	0.387094	0.245744	103.316	2	18	18	32.2	Thioredoxin-like protein 1	Mus musculus
Q9Z2B9	Rps6ka4,Msk2	1.30595	0.385102	0.542229	279.964	2	16	23	85.7	Ribosomal protein S6 kinase alpha-4	Mus musculus
Q8JZS9	Mrpl48	1.30407	0.383019	0.347628	248.766	2	26	26	24	39S ribosomal protein L48, mitochondrial	Mus musculus
Q8K1A6	Cc2d1a	1.30356	0.382461	0.577246		1	9	9	103.7	Coiled-coil and C2 domain-containing protein 1A	Mus musculus
A6H619	Phrf1,Kiaa1542	1.303	0.381843	0.267098	326.268	8	76	76	184.1	PHD and RING finger domain-containing protein 1	Mus musculus
Q8BU30	Iars	1.30233	0.381097	0.434114	480.362	11	93	93	144.3	Isoleucine--tRNA ligase, cytoplasmic	Mus musculus
P56135	Atp5j2	1.29912	0.37753	0.514904		1	8	8	10.3	ATP synthase subunit f, mitochondrial	Mus musculus
O08528	Hk2	1.29848	0.376828	0.123388	230.176	11	95	95	102.5	Hexokinase-2	Mus musculus
Q6NZC7	Sec23ip	1.29808	0.376375	0.364273	254.724	4	33	33	110.8	SEC23-interacting protein	Mus musculus
Q9WUA2	Farsb,Farsl,Farslb,Frsb	1.29725	0.37546	0.0863964	304.276	17	181	189	65.7	Phenylalanine--tRNA ligase beta subunit	Mus musculus
Q8BZM0	Klhl12,C3ip1	1.29582	0.373864	0.564667		1	9	14	63.2	Kelch-like protein 12	Mus musculus
P62751	Rpl23a	1.29528	0.373263	0.352316	743.851	22	295	313	17.7	60S ribosomal protein L23a	Mus musculus
O54774	Ap3d1,Ap3d	1.29469	0.372602	0.455468	434.006	4	31	45	135.1	AP-3 complex subunit delta-1	Mus musculus
Q9D937	1810009A15Rik,mCG_127334,mCG_17849	1.29321	0.370961	0.395994	508.486	10	106	106	14.1	Uncharacterized protein C11orf98 homolog	Mus musculus
Q02614	Sap30bp,Hcngp	1.28958	0.366898	0.398986	310.902	5	45	45	33.8	SAP30-binding protein	Mus musculus
Q6PGG6	Gnl3l	1.28839	0.365572	0.549166	526.331	7	63	63	65.2	Guanine nucleotide-binding protein-like 3-like protein	Mus musculus
Q99KN9	Clint1,Enth,Epn4,Epnr,Kiaa0171	1.2875	0.364571	0.0775199	161.544	6	54	54	68.5	Clathrin interactor 1	Mus musculus
Q04750	Top1,Top-1	1.28724	0.364283	0.0456482	395.265	33	364	396	90.9	DNA topoisomerase 1	Mus musculus
Q8VHH5	Agap3,Centg3	1.286	0.362888	0.198864	475.669	21	216	239	98	Arf-GAP with GTPase, ANK repeat and PH domain-containing protein 3	Mus musculus
Q4FZF3	Ddx49	1.28564	0.362482	0.597175		1	7	7	54.1	Probable ATP-dependent RNA helicase DDX49	Mus musculus
P23198	Cbx3	1.28365	0.360256	0.772692	829.587	5	37	37	20.9	Chromobox protein homolog 3	Mus musculus
Q8QZT1	Acat1	1.28307	0.3596	0.420024	71.0698	2	17	17	44.8	Acetyl-CoA acetyltransferase, mitochondrial	Mus musculus
Q9CR16	Ppid	1.28176	0.358122	0.686685		1	9	9	40.7	Peptidyl-prolyl cis-trans isomerase D	Mus musculus
P49135	Ercc3,Xpb,Xpbc	1.28142	0.357746	0.485919	311.059	5	39	39	89.1	TFIIH basal transcription factor complex helicase XPB subunit	Mus musculus
Q3UV55	Nr1d1,Ear1	1.27743	0.353241	0.545307	449.411	5	44	60	66.8	Nuclear receptor subfamily 1 group D member 1	Mus musculus
Q60960	Kpna1,Rch2	1.27701	0.352769	0.546504	319.767	3	26	32	60.2	Importin subunit alpha-5	Mus musculus
P17742	Ppia	1.27576	0.351362	0.332267	347.057	9	92	92	18	Peptidyl-prolyl cis-trans isomerase A	Mus musculus
Q9EQH4	Taf8,Tbn	1.27197	0.347061	0.47895	508.123	9	77	77	34	Transcription initiation factor TFIID subunit 8	Mus musculus
O88487	Dync1i2,Dnci2,Dncic2	1.27149	0.346515	0.667549	485.643	3	24	24	68.4	Cytoplasmic dynein 1 intermediate chain 2	Mus musculus
Q62419	Sh3gl1,Sh3d2b	1.27048	0.345372	0.487879	298.793	3	26	26	41.5	Endophilin-A2	Mus musculus
Q60710	Samhd1,Mg11	1.26885	0.343522	0.497973	243.599	2	14	14	72.7	Deoxynucleoside triphosphate triphosphohydrolase SAMHD1	Mus musculus
Q8BKH7	Mapkap1,Mip1,Sin1	1.26601	0.340294	0.539407	384.498	3	27	27	59	Target of rapamycin complex 2 subunit MAPKAP1	Mus musculus
O54833	Csnk2a2	1.26553	0.339741	0.395969	205.856	2	18	18	41.2	Casein kinase II subunit alpha'	Mus musculus
Q3THS6	Mat2a	1.26395	0.337943	0.565324	494.157	5	39	39	43.7	S-adenosylmethionine synthase isoform type-2	Mus musculus
Q8C176	Taf2	1.26263	0.336432	0.275392	507.322	20	179	212	127	Transcription initiation factor TFIID subunit 2	Mus musculus
Q91Z49	Fyttd1,Uif	1.26259	0.336384	0.151255	358.199	17	145	154	35.9	UAP56-interacting factor	Mus musculus
Q920Q6	Msi2,Msi2h	1.26045	0.33394	0.398826	294.515	4	54	66	36.9	RNA-binding protein Musashi homolog 2	Mus musculus
P97863	Nfib	1.25808	0.33122	0.393589	202.252	3	25	25	63.5	Nuclear factor 1 B-type	Mus musculus
Q99J77	Nans,Sas	1.25721	0.330222	0.645361	211.255	2	13	13	40	Sialic acid synthase	Mus musculus
Q9JMA1	Usp14	1.25686	0.329829	0.549166		1	8	14	56	Ubiquitin carboxyl-terminal hydrolase 14	Mus musculus
P32067	Ssb,Ss-b	1.25644	0.329337	0.1274	412.351	22	231	260	47.8	Lupus La protein homolog	Mus musculus
P14211	Calr	1.25602	0.328864	0.530843	327.729	4	30	36	48	Calreticulin	Mus musculus
Q9D6Z1	Nop56,Nol5a	1.25292	0.325294	0.126032	450.694	27	269	292	64.5	Nucleolar protein 56	Mus musculus
Q9JMG1	Edf1	1.24974	0.321629	0.267527	403.956	10	126	135	16.4	Endothelial differentiation-related factor 1	Mus musculus
Q9JHI7	Exosc9,Pmscl1	1.24733	0.318838	0.129403		1	9	9	48.9	Exosome complex component RRP45	Mus musculus
Q8BG81	Poldip3	1.2468	0.318226	0.0398739	268.936	21	194	194	46.1	Polymerase delta-interacting protein 3	Mus musculus
Q9CZU6	Cs	1.24626	0.317611	0.388494	78.944	3	23	23	51.7	Citrate synthase, mitochondrial	Mus musculus
Q8R1J3	Zcchc9	1.24601	0.317315	0.80558		1	8	8	30.5	Zinc finger CCHC domain-containing protein 9	Mus musculus
Q9EPC1	Parva,Actp,MNCb-0301	1.24525	0.316432	0.683657		1	9	9	42.3	Alpha-parvin	Mus musculus
Q01149	Col1a2,Cola2	1.24331	0.314192	0.550603	295.866	2	18	18	129.6	Collagen alpha-2(I) chain	Mus musculus
Q9EPL8	Ipo7,Ranbp7	1.24278	0.313571	0.568124	282.661	3	18	18	119.5	Importin-7	Mus musculus
Q921F2	Tardbp,Tdp43	1.24239	0.313116	0.359736	491.757	13	115	137	44.5	TAR DNA-binding protein 43	Mus musculus
Q922H2	Pdk3	1.24186	0.312507	0.364393	250.79	5	51	51	47.9	[Pyruvate dehydrogenase (acetyl-transferring)] kinase isozyme 3, mitochondrial	Mus musculus
Q9CXK9	Rbm33,Prr8	1.23987	0.310193	0.370117	37.9249	2	18	18	137.3	RNA-binding protein 33	Mus musculus
Q91XI1	Dus3l	1.23932	0.309544	0.345177	113.081	2	18	18	71.1	tRNA-dihydrouridine(47) synthase [NAD(P)(+)]-like	Mus musculus
Q61937	Npm1	1.23607	0.305764	0.386764	685.94	21	202	262	32.6	Nucleophosmin	Mus musculus
Q60596	Xrcc1,Xrcc-1	1.23607	0.305763	0.110642		1	9	9	69	DNA repair protein XRCC1	Mus musculus
Q61545	Ewsr1,Ews,Ewsh	1.23601	0.305689	0.587789	928.031	14	148	148	68.5	RNA-binding protein EWS	Mus musculus
Q791N7	Znrd1,Rpa12	1.23133	0.300219	0.758363	580.496	2	17	17	13.6	DNA-directed RNA polymerase I subunit RPA12	Mus musculus
P24788	Cdk11b,Cdc2l1,Cdk11	1.23117	0.300027	0.364393	305.631	6	53	59	91.5	Cyclin-dependent kinase 11B	Mus musculus
G5E8Z2	Taf4b,Taf2c2,Tafii105	1.23095	0.299773	0.275271	452.611	17	160	171	90.1	Transcription initiation factor TFIID subunit 4B	Mus musculus
Q8JZU2	Slc25a1,mCG_131850	1.23089	0.299698	0.665434	620.812	5	44	44	33.9	Tricarboxylate transport protein, mitochondrial	Mus musculus
Q8CCJ3	Ufl1,Kiaa0776	1.22861	0.297031	0.265945	117.404	3	26	26	89.5	E3 UFM1-protein ligase 1	Mus musculus
P25785	Timp2,Timp-2	1.22861	0.29703	0.774935	895.795	4	36	36	24.3	Metalloproteinase inhibitor 2	Mus musculus
O88447	Klc1,Kns2	1.22635	0.294367	0.863248	1146.25	2	18	18	61.5	Kinesin light chain 1	Mus musculus
Q11011	Npepps,Psa	1.22599	0.293948	0.658168	224.186	2	17	17	103.3	Puromycin-sensitive aminopeptidase	Mus musculus
P61027	Rab10	1.22547	0.293338	0.553934		1	9	9	22.5	Ras-related protein Rab-10	Mus musculus
Q7TT37	Ikbkap,Elp1,Ikap	1.22444	0.292124	0.640033	414.308	3	25	25	149.6	Elongator complex protein 1	Mus musculus
P22315	Fech	1.22402	0.291631	0.573398	254.413	3	22	22	47.1	Ferrochelatase, mitochondrial	Mus musculus
Q3UFY8	Trmt10c,Mrpp1,Rg9mtd1	1.223	0.290421	0.659136	285.998	3	22	22	48.4	Mitochondrial ribonuclease P protein 1	Mus musculus
Q925J9	Med1,Crsp210,Drip205,Pbp,Pparbp,Trap220,Trip2	1.22198	0.289217	0.17478	532.842	30	292	308	167.1	Mediator of RNA polymerase II transcription subunit 1	Mus musculus
P59325	Eif5	1.22089	0.287931	0.636844	628.878	7	61	61	49	Eukaryotic translation initiation factor 5	Mus musculus
Q9CQC7	Ndufb4	1.22049	0.287459	0.309155		1	8	8	15.1	NADH dehydrogenase [ubiquinone] 1 beta subcomplex subunit 4	Mus musculus
Q9JHK5	Plek	1.22033	0.287267	0.877974		1	4	4	39.9	Pleckstrin	Mus musculus
P40142	Tkt	1.21985	0.286704	0.554626	367.714	5	41	46	67.6	Transketolase	Mus musculus
Q8BJ05	Zc3h14	1.21938	0.286142	0.209755	388.095	17	166	166	82.4	Zinc finger CCCH domain-containing protein 14	Mus musculus
Q14AX6	Cdk12,Crk7,Crkrs,Kiaa0904	1.216	0.28214	0.54273		1	9	9	163.7	Cyclin-dependent kinase 12	Mus musculus
Q61316	Hspa4,Apg2,Hsp110	1.21505	0.28102	0.472283	506.809	9	83	91	94.1	Heat shock 70 kDa protein 4	Mus musculus
Q9DAJ4	Wdr83,Morg1	1.21199	0.277374	0.636694	297.065	2	15	15	34.4	WD repeat domain-containing protein 83	Mus musculus
Q9ERE7	Mesdc2,Mesd	1.21105	0.276254	0.39113	150.956	2	27	27	25.2	LDLR chaperone MESD	Mus musculus
A2AJA9	Gm996	1.20793	0.272532	0.874689		1	9	9	107.2	Uncharacterized protein C9orf172 homolog	Mus musculus
Q8K3Z9	Pom121,Nup121	1.20748	0.271994	0.30954		1	9	9	121	Nuclear envelope pore membrane protein POM 121	Mus musculus
Q8C092	Taf5	1.20645	0.270773	0.289608	450.558	14	134	148	87	Transcription initiation factor TFIID subunit 5	Mus musculus
Q62093	Srsf2,Pr264,Sfrs10,Sfrs2	1.20629	0.27058	0.356674	358.302	7	80	80	25.5	Serine/arginine-rich splicing factor 2	Mus musculus
P70257	Nfix	1.20597	0.270198	0.822384	823.526	2	14	14	53.4	Nuclear factor 1 X-type	Mus musculus
Q99M31	Hspa14,Hsp70-4	1.20554	0.269676	0.591803	299.166	2	18	18	54.7	Heat shock 70 kDa protein 14	Mus musculus
P97302	Bach1	1.2052	0.269274	0.486041		1	9	9	81.4	Transcription regulator protein BACH1	Mus musculus
P40630	Tfam,Hmgts	1.20447	0.268403	0.364971	377.663	9	80	80	28	Transcription factor A, mitochondrial	Mus musculus
Q91YW3	Dnajc3,P58ipk	1.20421	0.268084	0.736549	638.805	4	32	32	57.5	DnaJ homolog subfamily C member 3	Mus musculus
Q69Z99	Znf512,Kiaa1805,Zfp512	1.20386	0.267666	0.507143		1	7	7	63.9	Zinc finger protein 512	Mus musculus
Q9ESV0	Ddx24	1.20339	0.267101	0.318731	202.71	7	65	65	96.4	ATP-dependent RNA helicase DDX24	Mus musculus
Q69ZN7	Myof,Fer1l3,Kiaa1207	1.20321	0.266889	0.267098	333.905	14	112	112	233.3	Myoferlin	Mus musculus
O88844	Idh1	1.20274	0.266328	0.807271		1	6	6	46.7	Isocitrate dehydrogenase [NADP] cytoplasmic	Mus musculus
Q8BNV1	Trmt2a,Htf9-c,Htf9c	1.20254	0.266088	0.438285	75.9149	2	18	22	63.3	tRNA (uracil-5-)-methyltransferase homolog A	Mus musculus
Q9ET54	Palld,Kiaa0992	1.20172	0.2651	0.829432	872.347	2	14	20	152.1	Palladin	Mus musculus
Q8BPM2	Map4k5	1.20112	0.26438	0.415552	113.226	2	17	17	95	Mitogen-activated protein kinase kinase kinase kinase 5	Mus musculus
Q924X7	Stk33	1.2002	0.263271	0.335093		1	9	9	54.5	Serine/threonine-protein kinase 33	Mus musculus
P02535	Krt10,Krt1-10	1.19974	0.262725	0.652696	325.414	4	18	18	57.8	Keratin, type I cytoskeletal 10	Mus musculus
Q922U2	Krt5,Krt2-5	1.19764	0.260195	0.654349	344.769	4	36	52	61.8	Keratin, type II cytoskeletal 5	Mus musculus
P50580	Pa2g4,Ebp1,Plfap	1.19757	0.26011	0.497329	536.379	10	93	98	43.7	Proliferation-associated protein 2G4	Mus musculus
P16858	Gapdh,Gapd	1.1974	0.259902	0.625284	1137.05	17	163	257	35.8	Glyceraldehyde-3-phosphate dehydrogenase	Mus musculus
Q9JIX8	Acin1,Acinus	1.19489	0.256878	0.486202	511.521	6	67	67	150.7	Apoptotic chromatin condensation inducer in the nucleus	Mus musculus
Q9DCD0	Pgd	1.19436	0.256238	0.503293		1	9	9	53.2	6-phosphogluconate dehydrogenase, decarboxylating	Mus musculus
P47955	Rplp1	1.19263	0.254152	0.866325		1	9	9	11.5	60S acidic ribosomal protein P1	Mus musculus
Q62186	Ssr4	1.19188	0.253245	0.814667		1	9	9	18.9	Translocon-associated protein subunit delta	Mus musculus
Q6UQ17	Atp8b3	1.19171	0.253028	0.791633		1	9	9	152	Phospholipid-transporting ATPase IK	Mus musculus
Q8BVY0	Rsl1d1	1.19092	0.252079	0.398609	638.286	17	182	195	50.4	Ribosomal L1 domain-containing protein 1	Mus musculus
Q8K2D3	Edc3,Yjdc	1.19033	0.251362	0.59464		1	9	9	56	Enhancer of mRNA-decapping protein 3	Mus musculus
P61514	Rpl37a	1.18701	0.247328	0.628952	596.43	6	54	54	10.3	60S ribosomal protein L37a	Mus musculus
Q9DCG9	Trmt112	1.18231	0.241613	0.358177		1	9	9	14.1	Multifunctional methyltransferase subunit TRM112-like protein	Mus musculus
P84102	Serf2	1.18077	0.239728	0.79427	693.943	2	18	18	6.9	Small EDRK-rich factor 2	Mus musculus
Q9CZI9	Aen,Isg20l1	1.18059	0.239509	0.642348	375.898	2	18	18	37.3	Apoptosis-enhancing nuclease	Mus musculus
Q922B2	Dars	1.1779	0.236214	0.57576	582.946	9	80	80	57.1	Aspartate--tRNA ligase, cytoplasmic	Mus musculus
Q9D823	Rpl37	1.17696	0.235064	0.795115	1286.64	6	72	80	11.1	60S ribosomal protein L37	Mus musculus
Q99M87	Dnaja3,Tid1	1.17618	0.234105	0.664179	540.212	5	36	36	52.4	DnaJ homolog subfamily A member 3, mitochondrial	Mus musculus
Q9ERA6	Tfip11,Stip,Tip39	1.17566	0.233466	0.405499		1	9	9	96.3	Tuftelin-interacting protein 11	Mus musculus
Q8C854	Myef2,Kiaa1341,Mef2	1.17543	0.23319	0.338633	540.263	18	183	183	63.3	Myelin expression factor 2	Mus musculus
Q9ER72	Cars	1.17449	0.232038	0.785474	679.385	2	17	25	94.9	Cysteine--tRNA ligase, cytoplasmic	Mus musculus
P62862	Fau	1.17409	0.231537	0.795792	1496.73	8	98	98	6.6	40S ribosomal protein S30	Mus musculus
Q8BNE1	Tcaf1 {ECO:0000250|UniProtKB:Q9Y4C2,,Fam115a,Kiaa0738	1.17395	0.231373	0.819563		1	9	9	102.7	TRPM8 channel-associated factor 1	Mus musculus
P62915	Gtf2b	1.17382	0.231209	0.37668	132.584	3	27	35	34.8	Transcription initiation factor IIB	Mus musculus
P30681	Hmgb2,Hmg2	1.17356	0.230894	0.636694	943.664	9	123	123	24.2	High mobility group protein B2	Mus musculus
Q9JLJ2	Aldh9a1	1.17235	0.229409	0.528689	135.008	2	18	18	53.5	4-trimethylaminobutyraldehyde dehydrogenase	Mus musculus
P25976	Ubtf,Tcfubf,Ubf-1,Ubf1	1.17171	0.228614	0.187007	458.303	25	258	273	89.5	Nucleolar transcription factor 1	Mus musculus
E9Q4F7	Ankrd11	1.17084	0.227539	0.736549		1	9	9	296.2	Ankyrin repeat domain-containing protein 11	Mus musculus
Q8BX10	Pgam5	1.17044	0.227045	0.534801	282.085	4	44	53	32	Serine/threonine-protein phosphatase PGAM5, mitochondrial	Mus musculus
Q99LE6	Abcf2	1.16983	0.226297	0.657332	645.052	7	61	61	71.8	ATP-binding cassette sub-family F member 2	Mus musculus
P60824	Cirbp,Cirp	1.1655	0.220946	0.655005	626.143	5	49	49	18.6	Cold-inducible RNA-binding protein	Mus musculus
Q8K2F0	Brd3,Fsrg2	1.1642	0.219333	0.354529		1	9	9	79.8	Bromodomain-containing protein 3	Mus musculus
Q6DFV5	Helz,Kiaa0054	1.16212	0.216759	0.408876	349.403	8	72	72	219.9	Probable helicase with zinc finger domain	Mus musculus
Q80UV9	Taf1,Ccg1	1.15959	0.213615	0.314626	697.169	29	270	291	214.4	Transcription initiation factor TFIID subunit 1	Mus musculus
Q8C052	Map1s,Bpy2ip1,Map8,Mtap1s	1.15885	0.212696	0.466079	339.33	6	52	52	102.9	Microtubule-associated protein 1S	Mus musculus
Q9D0L8	Rnmt,Kiaa0398	1.15778	0.211362	0.558634	378.402	3	42	42	53.3	mRNA cap guanine-N7 methyltransferase	Mus musculus
Q9D7M1	Gid8	1.15776	0.211331	0.661304	387.213	3	27	27	26.8	Glucose-induced degradation protein 8 homolog	Mus musculus
P54775	Psmc4,Tbp7	1.15724	0.210693	0.657332	651.102	7	64	79	47.4	26S protease regulatory subunit 6B	Mus musculus
Q9D2E2	Toe1	1.15608	0.209241	0.802674		1	9	9	56.9	Target of EGR1 protein 1	Mus musculus
Q3TYX3	Smyd5,Rai15	1.15548	0.208486	0.505012		1	9	9	47.1	SET and MYND domain-containing protein 5	Mus musculus
Q9JHS9	Cwc15,Ed1	1.15284	0.205195	0.607773	419.359	3	27	27	26.6	Spliceosome-associated protein CWC15 homolog	Mus musculus
Q91VK4	Itm2c	1.15156	0.203586	0.732272		1	8	8	30.5	Integral membrane protein 2C	Mus musculus
Q91VE6	Mki67ip,Nifk	1.15094	0.202809	0.465089	150.255	5	45	45	36.3	MKI67 FHA domain-interacting nucleolar phosphoprotein	Mus musculus
Q9JJU9	Crybb3	1.14907	0.200461	0.665434		1	9	9	24.3	Beta-crystallin B3	Mus musculus
Q05CL8	Larp7,D3Wsu161e	1.14905	0.200448	0.654349	590.241	5	40	40	64.8	La-related protein 7	Mus musculus
P62196	Psmc5,Sug1	1.14687	0.197696	0.536436	137.688	2	18	25	45.6	26S protease regulatory subunit 8	Mus musculus
Q9WTM5	Ruvbl2	1.1431	0.192949	0.478048	867.706	27	246	263	51.1	RuvB-like 2	Mus musculus
Q9WU62	Incenp	1.14213	0.191733	0.530037	124.213	2	18	18	101.2	Inner centromere protein	Mus musculus
Q7TQK4	Exosc3,Rrp40	1.1403	0.189408	0.812682		1	9	9	29.5	Exosome complex component RRP40	Mus musculus
Q9CQ62	Decr1	1.13924	0.188077	0.700152		1	9	9	36.2	2,4-dienoyl-CoA reductase, mitochondrial	Mus musculus
Q6NZB0	Dnajc8	1.13722	0.185516	0.458868	335.262	8	72	72	29.8	DnaJ homolog subfamily C member 8	Mus musculus
Q8BM55	Tmem214	1.13496	0.182638	0.620522	568.483	7	59	59	76.4	Transmembrane protein 214	Mus musculus
Q76MZ3	Ppp2r1a	1.1348	0.182432	0.649703	903.527	12	108	108	65.3	Serine/threonine-protein phosphatase 2A 65 kDa regulatory subunit A alpha isoform	Mus musculus
Q8R0A0	Gtf2f2	1.13455	0.182125	0.528689	281.405	4	36	36	28.4	General transcription factor IIF subunit 2	Mus musculus
Q5SWU9	Acaca,Acac,Gm738	1.13447	0.182012	0.853662		1	5	5	265.3	Acetyl-CoA carboxylase 1	Mus musculus
P61750	Arf4	1.13408	0.181516	0.727648		1	9	9	20.4	ADP-ribosylation factor 4	Mus musculus
Q9R0L6	Pcm1	1.13396	0.181376	0.335913	317.585	9	81	81	228.8	Pericentriolar material 1 protein	Mus musculus
P62082	Rps7	1.13368	0.181016	0.696476	1511.92	21	228	336	22.1	40S ribosomal protein S7	Mus musculus
Q4VA53	Pds5b,Aprin,As3,Kiaa0979	1.13144	0.178164	0.69105	414.005	4	28	28	164.4	Sister chromatid cohesion protein PDS5 homolog B	Mus musculus
Q9DCE5	Pak1ip1	1.13071	0.17723	0.671478	748.055	8	71	78	42.1	p21-activated protein kinase-interacting protein 1	Mus musculus
Q08024	Cbfb,Pebp2b,Pebpb2	1.13059	0.177077	0.690028		1	9	9	22	Core-binding factor subunit beta	Mus musculus
Q9DA19	Cir1,Cir	1.12464	0.169464	0.657531	403.342	5	42	50	51.8	Corepressor interacting with RBPJ 1	Mus musculus
P60122	Ruvbl1,Tip49,Tip49a	1.12291	0.167241	0.653294	1137.46	17	190	236	50.2	RuvB-like 1	Mus musculus
Q8BTI8	Srrm2,Kiaa0324	1.12231	0.166474	0.401655	1066.92	52	498	514	294.8	Serine/arginine repetitive matrix protein 2	Mus musculus
Q69ZB8	Zcchc2,Kiaa1744	1.12182	0.165838	0.713967		1	9	9	124.5	Zinc finger CCHC domain-containing protein 2	Mus musculus
Q9JMG7	Hdgfrp3	1.12007	0.163584	0.751176		1	9	9	22.4	Hepatoma-derived growth factor-related protein 3	Mus musculus
Q8BFP9	Pdk1	1.11902	0.162238	0.795494	772.557	3	20	20	49	[Pyruvate dehydrogenase (acetyl-transferring)] kinase isozyme 1, mitochondrial	Mus musculus
Q8BHG9	Cggbp1	1.11899	0.1622	0.683497	639.915	6	55	55	18.8	CGG triplet repeat-binding protein 1	Mus musculus
Q5RJH6	Smg7,Est1c,Kiaa0250	1.11846	0.161516	0.57806	379.38	5	42	42	126.8	Protein SMG7	Mus musculus
Q6P9R2	Oxsr1,Osr1	1.11719	0.159877	0.681915		1	8	8	58.2	Serine/threonine-protein kinase OSR1	Mus musculus
Q9DCC8	Tomm20	1.11636	0.158805	0.564351		1	9	9	16.3	Mitochondrial import receptor subunit TOM20 homolog	Mus musculus
O08807	Prdx4	1.11332	0.154863	0.758363		1	9	9	31.1	Peroxiredoxin-4	Mus musculus
Q810D6	Grwd1,A301	1.11317	0.15467	0.857781		1	9	9	49.2	Glutamate-rich WD repeat-containing protein 1	Mus musculus
Q8K1R7	Nek9,Nercc	1.11253	0.153846	0.893011		1	9	9	107.1	Serine/threonine-protein kinase Nek9	Mus musculus
Q9DBF7	Cwc25,Ccdc49	1.112	0.153157	0.400341		1	9	9	48.8	Pre-mRNA-splicing factor CWC25 homolog	Mus musculus
P29037	Tbp,Tfiid	1.11117	0.152083	0.800921	139.601	2	14	23	34.7	TATA-box-binding protein	Mus musculus
Q9CX56	Psmd8	1.11053	0.151252	0.831193		1	5	5	39.9	26S proteasome non-ATPase regulatory subunit 8	Mus musculus
Q7SIG6	Asap2,Ddef2,Gm1523,Gm592	1.10885	0.149059	0.874		1	9	9	106.8	Arf-GAP with SH3 domain, ANK repeat and PH domain-containing protein 2	Mus musculus
Q8R5H1	Usp15,Kiaa0529	1.10881	0.149016	0.714719	1044.68	10	77	77	112.3	Ubiquitin carboxyl-terminal hydrolase 15	Mus musculus
Q8C1B7	Sept11,D5Ertd606e	1.10693	0.146564	0.635998	413.27	4	44	44	49.7	Septin-11	Mus musculus
Q99L45	Eif2s2	1.10325	0.141754	0.725512	1118.8	11	110	119	38.1	Eukaryotic translation initiation factor 2 subunit 2	Mus musculus
Q9CR80	Fam32a,Otag12,MNCb-3154	1.10303	0.141466	0.827021	764.322	2	26	26	13.2	Protein FAM32A	Mus musculus
Q62311	Taf6,Taf2e	1.10005	0.137563	0.556066	976.079	24	246	288	72.7	Transcription initiation factor TFIID subunit 6	Mus musculus
Q61187	Tsg101	1.09887	0.136017	0.739427	491.045	2	18	18	44.1	Tumor susceptibility gene 101 protein	Mus musculus
Q9QZQ8	H2afy	1.09882	0.135953	0.884491	1608.88	5	37	37	39.7	Core histone macro-H2A.1	Mus musculus
P59326	Ythdf1	1.09776	0.134566	0.767454	589.128	3	21	21	60.9	YTH domain-containing family protein 1	Mus musculus
Q80V31	Cep104,Kiaa0562	1.0973	0.133961	0.877564	760.873	2	16	16	103.9	Centrosomal protein of 104 kDa	Mus musculus
Q8K0H5	Taf10,Taf2h,Tafii30	1.09717	0.133793	0.858348	1198.3	5	38	65	21.8	Transcription initiation factor TFIID subunit 10	Mus musculus
Q9CR62	Slc25a11	1.09716	0.133772	0.737839	656.198	3	27	27	34.2	Mitochondrial 2-oxoglutarate/malate carrier protein	Mus musculus
Q2KN98	Specc1l,Cytsa,Kiaa0376	1.09607	0.132336	0.458697	910.472	26	288	312	124.5	Cytospin-A	Mus musculus
Q80UW8	Polr2e	1.09477	0.130631	0.874	1308.01	3	27	27	24.6	DNA-directed RNA polymerases I, II, and III subunit RPABC1	Mus musculus
O35680	Mrps12,Rpms12	1.0942	0.129871	0.721442		1	9	9	15.4	28S ribosomal protein S12, mitochondrial	Mus musculus
Q9CR02	Tma16	1.09383	0.129392	0.920333		1	5	5	25.8	Translation machinery-associated protein 16	Mus musculus
Q569Z6	Thrap3,Trap150	1.09214	0.127164	0.490323	925.402	29	286	308	108.2	Thyroid hormone receptor-associated protein 3	Mus musculus
P62897	Cycs	1.09134	0.126099	0.761236		1	9	9	11.6	Cytochrome c, somatic	Mus musculus
Q07643	Col9a2	1.09131	0.126063	0.740464		1	9	9	65.3	Collagen alpha-2(IX) chain	Mus musculus
Q9DCA2	Mrps11	1.09093	0.125563	0.723499		1	9	9	20.2	28S ribosomal protein S11, mitochondrial	Mus musculus
P58871	Tnks1bp1,Kiaa1741,Tab182	1.08785	0.121481	0.681915	568.13	7	59	68	181.8	182 kDa tankyrase-1-binding protein	Mus musculus
P62892	Rpl39	1.08681	0.120097	0.946623	3461.21	2	27	27	6.4	60S ribosomal protein L39	Mus musculus
Q3USZ2	Ubtfl1,Hmgpi	1.08583	0.118797	0.833829		1	9	9	46.1	Upstream-binding factor 1-like protein 1	Mus musculus
Q9D735		1.08499	0.117677	0.823883	1360.47	6	60	60	18.4	Uncharacterized protein C19orf43 homolog	Mus musculus
P57784	Snrpa1	1.08154	0.113082	0.701495	833.072	7	72	72	28.4	U2 small nuclear ribonucleoprotein A'	Mus musculus
Q64213	Sf1,Zfm1,Zfp162	1.0812	0.112636	0.799989	1528.47	8	94	106	70.4	Splicing factor 1	Mus musculus
Q9D7G0	Prps1	1.08067	0.11193	0.820106	935.64	2	27	27	34.8	Ribose-phosphate pyrophosphokinase 1	Mus musculus
F6ZDS4	Tpr	1.08014	0.111223	0.886956	1416.64	2	15	15	274	Nucleoprotein TPR	Mus musculus
Q91Z67	Srgap2,Fbp27,Fnbp2	1.07904	0.109752	0.596711		1	9	18	120.8	SLIT-ROBO Rho GTPase-activating protein 2	Mus musculus
Q8CIB5	Fermt2,Plekhc1	1.07892	0.109586	0.837093	813.658	3	18	18	77.8	Fermitin family homolog 2	Mus musculus
Q9D7H3	RtcA,Rpc1,Rtcd1	1.07791	0.108243	0.868093		1	9	9	39.3	RNA 3'-terminal phosphate cyclase	Mus musculus
O08583	Alyref,Aly,Ref1,Refbp1,THOC4	1.07723	0.10733	0.831385	1622.46	8	82	91	26.9	THO complex subunit 4	Mus musculus
P70333	Hnrnph2,Hnrph2	1.07653	0.10639	0.884432	1786.07	5	36	43	49.3	Heterogeneous nuclear ribonucleoprotein H2	Mus musculus
Q8C6G8	Wdr26	1.07637	0.10618	0.870698	1353.5	5	34	34	70.5	WD repeat-containing protein 26	Mus musculus
P47962	Rpl5	1.0763	0.106079	0.770865	1720.15	16	180	195	34.4	60S ribosomal protein L5	Mus musculus
P16045	Lgals1,Gbp	1.07502	0.104367	0.577371		1	9	9	14.9	Galectin-1	Mus musculus
P61358	Rpl27	1.07088	0.0987956	0.796929	1844.57	13	166	166	15.8	60S ribosomal protein L27	Mus musculus
Q3TIV5	Zc3h15,Dfrp1	1.07083	0.0987318	0.778893	1225.85	9	97	105	48.3	Zinc finger CCCH domain-containing protein 15	Mus musculus
Q6P4T2	Snrnp200,Kiaa0788	1.07022	0.0979052	0.726831	1334.06	17	153	183	244.5	U5 small nuclear ribonucleoprotein 200 kDa helicase	Mus musculus
O35143	Atpif1,Atpi,If1	1.07002	0.0976321	0.780821	1326.18	7	84	84	12.2	ATPase inhibitor, mitochondrial	Mus musculus
Q9R0B7	Znf346,Jaz,Zfp346	1.06747	0.0942008	0.834166		1	9	9	32.7	Zinc finger protein 346	Mus musculus
Q6PFX9	Tnks,Tnks1	1.06711	0.0937126	0.762632	669.922	4	36	36	140.9	Tankyrase-1	Mus musculus
Q80UG5	Sept9,Kiaa0991,Sint1	1.06632	0.0926416	0.804381	1480.62	12	104	104	65.6	Septin-9	Mus musculus
Q3TXS7	Psmd1	1.06318	0.0883895	0.874	1766.12	8	58	61	105.7	26S proteasome non-ATPase regulatory subunit 1	Mus musculus
Q9QWT9	Kifc1,Kifc4,Kifc5a,Kifc5b	1.0629	0.0880069	0.657531		1	7	7	74.2	Kinesin-like protein KIFC1	Mus musculus
Q9JIB4	Gtf2h2,Btf2p44	1.06033	0.0845186	0.811027	493.44	2	26	26	44.7	General transcription factor IIH subunit 2	Mus musculus
Q9R1C7	Prpf40a,Fbp11,Fnbp3	1.06007	0.0841662	0.761789	1360.75	12	133	149	108.5	Pre-mRNA-processing factor 40 homolog A	Mus musculus
Q9CRB9	Chchd3,Mic19	1.05745	0.0805875	0.804136	908.333	5	45	45	26.3	MICOS complex subunit Mic19	Mus musculus
P70700	Polr1b,Rpa2,Rpo1-2	1.057	0.0799751	0.875801	1668.99	6	49	73	128.2	DNA-directed RNA polymerase I subunit RPA2	Mus musculus
Q8R331	Znhit1	1.05698	0.0799479	0.823883		1	9	9	17.5	Zinc finger HIT domain-containing protein 1	Mus musculus
Q9Z1P6	Ndufa7	1.05518	0.0774917	0.893379	868.178	2	18	18	12.6	NADH dehydrogenase [ubiquinone] 1 alpha subcomplex subunit 7	Mus musculus
Q9R1C0	Taf7,Taf2f	1.05423	0.0761946	0.92094	2719.64	5	41	41	39.1	Transcription initiation factor TFIID subunit 7	Mus musculus
Q9DBA9	Gtf2h1	1.05303	0.0745495	0.874689	1491.98	4	30	30	61.9	General transcription factor IIH subunit 1	Mus musculus
P18242	Ctsd	1.04829	0.0680355	0.807271	473.986	3	27	27	45	Cathepsin D	Mus musculus
Q9CRD0	Ociad1,Asrij	1.0474	0.0668082	0.910293		1	9	9	27.6	OCIA domain-containing protein 1	Mus musculus
P04104	Krt1,Krt2-1	1.04691	0.0661383	0.95257	4083.07	4	36	36	65.6	Keratin, type II cytoskeletal 1	Mus musculus
Q6PEV3	Wipf2,Wire	1.0463	0.0652995	0.807271		1	9	9	46.3	WAS/WASL-interacting protein family member 2	Mus musculus
Q8VD76	Gtf2h3	1.04593	0.0647849	0.716744	161.889	2	18	18	34.2	General transcription factor IIH subunit 3	Mus musculus
O35326	Srsf5,Hrs,Sfrs5	1.04487	0.063318	0.878021	2386.26	10	101	101	30.9	Serine/arginine-rich splicing factor 5	Mus musculus
Q9QZ28	Six6,Optx2,Six9	1.04164	0.0588599	0.910293		1	9	9	27.7	Homeobox protein SIX6	Mus musculus
Q80ZS3	Mrps26	1.04082	0.0577214	0.915081	1506.11	3	27	27	23.4	28S ribosomal protein S26, mitochondrial	Mus musculus
Q08639	Tfdp1	1.04047	0.0572395	0.935307		1	9	9	45.2	Transcription factor Dp-1	Mus musculus
Q64331	Myo6,Sv	1.04012	0.0567434	0.841342	1706.39	9	88	114	146.4	Unconventional myosin-VI	Mus musculus
Q9Z0U1	Tjp2,Zo2	1.03792	0.0536913	0.898028		1	9	9	131.3	Tight junction protein ZO-2	Mus musculus
Q8C0I1	Agps	1.03687	0.0522344	0.959911	4187.15	2	17	23	71.7	Alkyldihydroxyacetonephosphate synthase, peroxisomal	Mus musculus
P63158	Hmgb1,Hmg-1,Hmg1	1.03417	0.0484694	0.882801	3511.09	14	191	191	24.9	High mobility group protein B1	Mus musculus
O89017	Lgmn,Prsc1	1.03323	0.0471635	0.92094		1	9	16	49.4	Legumain	Mus musculus
Q9R0P6	Sec11a,Sec11l1,Sid2895,Spc18	1.03259	0.0462693	0.959911		1	9	9	20.6	Signal peptidase complex catalytic subunit SEC11A	Mus musculus
Q7TMY8	Huwe1,Kiaa0312,Ureb1	1.03143	0.0446428	0.970324	5171.51	2	12	18	482.6	E3 ubiquitin-protein ligase HUWE1	Mus musculus
Q62481	Vps72,Tcfl1,Yl1	1.03071	0.0436316	0.92946	3026.72	4	45	45	40.8	Vacuolar protein sorting-associated protein 72 homolog	Mus musculus
Q9WVJ2	Psmd13	1.02588	0.0368668	0.946623	1454.46	2	18	27	42.8	26S proteasome non-ATPase regulatory subunit 13	Mus musculus
P61957	Sumo2,Smt3a,Smt3h2	1.02408	0.0343331	0.951145		1	9	9	10.9	Small ubiquitin-related modifier 2	Mus musculus
Q8CI08	Slain2,Kiaa1458	1.02266	0.0323312	0.927643	2234.34	5	43	43	62.4	SLAIN motif-containing protein 2	Mus musculus
Q3U9G9	Lbr	1.02162	0.0308581	0.940864	2785.91	5	39	39	71.4	Lamin-B receptor	Mus musculus
Q8VI33	Taf9,Taf2g	1.02137	0.0305083	0.935307	4304.29	9	81	87	29	Transcription initiation factor TFIID subunit 9	Mus musculus
P62821	Rab1A,Rab1	1.01795	0.0256643	0.959752		1	9	16	22.7	Ras-related protein Rab-1A	Mus musculus
Q4VAA2	Cdv3	1.01752	0.025064	0.933962	3004.89	6	52	52	29.7	Protein CDV3	Mus musculus
Q9CXT8	Pmpcb	1.01503	0.0215243	0.975201		1	8	8	54.6	Mitochondrial-processing peptidase subunit beta	Mus musculus
Q68ED3	Papd5	1.01399	0.020041	0.961622	1413.43	3	20	38	69.7	Non-canonical poly(A) RNA polymerase PAPD5	Mus musculus
Q3UM18	Lsg1,D16Bwg1547e	1.01374	0.0196922	0.952776	6620.16	10	87	87	73.2	Large subunit GTPase 1 homolog	Mus musculus
Q08943	Ssrp1	1.01343	0.0192405	0.962947		1	9	9	80.9	FACT complex subunit SSRP1	Mus musculus
Q921M3	Sf3b3,Kiaa0017	1.01306	0.0187161	0.950288	7770.06	15	148	148	135.6	Splicing factor 3B subunit 3	Mus musculus
Q4VC33	Maea,Emp	1.01235	0.0177081	0.973271	6580.99	4	36	36	45.3	Macrophage erythroblast attacher	Mus musculus
P63017	Hspa8,Hsc70,Hsc73	1.01224	0.0175566	0.957398	14621.2	31	380	471	70.9	Heat shock cognate 71 kDa protein	Mus musculus
Q6ZPL9	Ddx55,Kiaa1595	1.01189	0.0170595	0.9746		1	9	9	68.5	ATP-dependent RNA helicase DDX55	Mus musculus
Q9CWT6	Ddx28	1.0117	0.0167809	0.966802	2984.09	2	16	16	59.5	Probable ATP-dependent RNA helicase DDX28	Mus musculus
P70122	Sbds	1.01105	0.0158502	0.969694	4702.89	2	18	18	28.8	Ribosome maturation protein SBDS	Mus musculus
P70698	Ctps1	1.01019	0.0146236	0.966802	4553.9	4	36	36	66.7	CTP synthase 1	Mus musculus
Q9D1L0	Chchd2	1.00983	0.0141195	0.984983	8264.46	2	15	15	15.7	Coiled-coil-helix-coiled-coil-helix domain-containing protein 2	Mus musculus
P70168	Kpnb1,Impnb	1.00956	0.0137331	0.980094	8454.45	3	27	44	97.2	Importin subunit beta-1	Mus musculus
Q7TPM1	Prrc2b,Bat2l,Bat2l1,Kiaa0515	1.00642	0.0092363	0.957605	11112.9	30	265	272	160.9	Protein PRRC2B	Mus musculus
Q9QXA5	Lsm4	1.00584	0.00840672	0.987291	2274.76	2	17	17	15.1	U6 snRNA-associated Sm-like protein LSm4	Mus musculus
P39876	Timp3,Sun,Timp-3	1.00372	0.00535426	0.99766		1	7	7	24.2	Metalloproteinase inhibitor 3	Mus musculus
Q8BGT7	Smndc1,Smnr,Spf30	1.0013	0.00187316	0.996689	60373.2	5	48	57	26.8	Survival of motor neuron-related-splicing factor 30	Mus musculus
Q9JJI8	Rpl38	1.00023	0.000325305	0.999485	697482	12	147	147	8.2	60S ribosomal protein L38	Mus musculus
Q07231	Zscan21,Zfp-38,Zfp38,Zipro1,Znf38	1.00013	0.000190361	0.999485		1	8	8	63	Zinc finger and SCAN domain-containing protein 21	Mus musculus
Q6ZQ03	Fnbp4,Fbp30,Kiaa1014	0.99666	-0.00482619	0.984983		1	9	9	111.2	Formin-binding protein 4	Mus musculus
Q3TTY5	Krt2,K2e,Krt2-17,Krt2a	0.995863	-0.00598048	0.996516	46378.3	5	43	43	70.9	Keratin, type II cytoskeletal 2 epidermal	Mus musculus
P83870	Phf5a	0.993225	-0.00980771	0.985368	14253.9	4	36	36	12.4	PHD finger-like domain-containing protein 5A	Mus musculus
Q8BQM9	Med12l,Kiaa3007	0.992661	-0.0106267	0.998413	49178.4	2	8	8	241.4	Mediator of RNA polymerase II transcription subunit 12-like protein	Mus musculus
P11440	Cdk1,Cdc2,Cdc2a,Cdkn1	0.991145	-0.0128324	0.97335		1	8	8	34.1	Cyclin-dependent kinase 1	Mus musculus
Q78WZ7	Twistnb	0.989297	-0.0155243	0.981138	8334.03	3	26	26	36.7	DNA-directed RNA polymerase I subunit RPA43	Mus musculus
Q00547	Hmmr,Ihabp,Rhamm	0.989206	-0.0156564	0.972907	6995.51	4	33	33	91.8	Hyaluronan mediated motility receptor	Mus musculus
P55302	Lrpap1	0.987481	-0.0181745	0.970324		1	9	9	42.2	Alpha-2-macroglobulin receptor-associated protein	Mus musculus
O08810	Eftud2,Snrp116	0.987439	-0.0182359	0.95936	7487.02	10	94	94	109.4	116 kDa U5 small nuclear ribonucleoprotein component	Mus musculus
P48453	Ppp3cb,Calnb	0.985879	-0.0205176	0.945597		1	9	9	59.2	Serine/threonine-protein phosphatase 2B catalytic subunit beta isoform	Mus musculus
Q8VE97	Srsf4,Sfrs4,MNCb-2616	0.985442	-0.021157	0.945196		1	4	4	56	Serine/arginine-rich splicing factor 4	Mus musculus
P70460	Vasp	0.984358	-0.0227444	0.911357	1175.39	3	27	27	39.7	Vasodilator-stimulated phosphoprotein	Mus musculus
Q3UEB3	Puf60	0.983087	-0.0246086	0.976212	7800.12	4	33	33	60.2	Poly(U)-binding-splicing factor PUF60	Mus musculus
Q8R3S6	Exoc1,Sec3,Sec3l1	0.981957	-0.0262685	0.911357		1	9	9	101.9	Exocyst complex component 1	Mus musculus
Q8VHG2	Amot,Kiaa1071	0.981937	-0.0262984	0.931357		1	9	9	120.9	Angiomotin	Mus musculus
P67984	Rpl22	0.978938	-0.0307105	0.963308	9774.76	11	105	105	14.8	60S ribosomal protein L22	Mus musculus
Q8CCS6	Pabpn1,Pab2,Pabp2	0.977671	-0.0325785	0.952553	2280.6	3	33	39	32.3	Polyadenylate-binding protein 2	Mus musculus
Q8BJW6	Eif2a,D3Ertd194e	0.976857	-0.0337802	0.912581	2164.75	5	45	45	64.4	Eukaryotic translation initiation factor 2A	Mus musculus
Q8K4F6	Nsun5,Wbscr20,Wbscr20a	0.974216	-0.0376869	0.909255	2444.52	6	54	62	51	Probable 28S rRNA (cytosine-C(5))-methyltransferase	Mus musculus
P28740	Kif2a,Kif2,Kns2	0.974205	-0.0377026	0.88453	2561.62	15	129	129	79.8	Kinesin-like protein KIF2A	Mus musculus
Q99JX7	Nxf1,Tap	0.973061	-0.0393978	0.910973	2813	6	61	70	70.3	Nuclear RNA export factor 1	Mus musculus
Q60598	Cttn,Ems1	0.970465	-0.0432517	0.868795	3009.62	18	194	194	61.2	Src substrate cortactin	Mus musculus
Q8JZZ6	Ammecr1l	0.968879	-0.0456111	0.880327		1	9	9	34.5	AMMECR1-like protein	Mus musculus
Q8R0S2	Iqsec1,Kiaa0763	0.968848	-0.0456571	0.88453		1	9	9	108	IQ motif and SEC7 domain-containing protein 1	Mus musculus
Q9Z1Q9	Vars,Bat6,G7a,Vars2	0.968844	-0.0456633	0.869543	1656.6	6	63	63	140.2	Valine--tRNA ligase	Mus musculus
Q80WJ7	Mtdh,Lyric	0.966843	-0.048646	0.881563	3751.38	19	206	206	63.8	Protein LYRIC	Mus musculus
Q60855	Ripk1,Rinp,Rip	0.964027	-0.0528539	0.88966		1	9	9	74.9	Receptor-interacting serine/threonine-protein kinase 1	Mus musculus
O54784	Dapk3,Zipk	0.963757	-0.0532582	0.865003	1829.3	12	112	128	51.4	Death-associated protein kinase 3	Mus musculus
Q3UL36	Arglu1	0.963674	-0.0533828	0.898028	4257.41	18	206	215	32.9	Arginine and glutamate-rich protein 1	Mus musculus
P14869	Rplp0,Arbp	0.962199	-0.0555928	0.878511	2447.58	12	133	160	34.2	60S acidic ribosomal protein P0	Mus musculus
P97313	Prkdc,Xrcc7	0.962079	-0.0557729	0.931357		1	9	9	471.5	DNA-dependent protein kinase catalytic subunit	Mus musculus
Q8CHP5	Pym1,Pym,Wibg	0.961377	-0.0568265	0.838538	264.698	2	18	18	22.7	Partner of Y14 and mago	Mus musculus
Q91W10	Slc39a8,Zip8	0.960876	-0.0575775	0.877564		1	9	9	50.1	Zinc transporter ZIP8	Mus musculus
Q9CWX9	Ddx47	0.959553	-0.059566	0.925517	1319.31	2	10	22	50.6	Probable ATP-dependent RNA helicase DDX47	Mus musculus
P62869	Tceb2	0.958725	-0.0608117	0.922153		1	8	8	13.2	Elongin-B	Mus musculus
O54931	Akap2	0.958178	-0.0616348	0.900713	1838.63	4	36	36	98.6	A-kinase anchor protein 2	Mus musculus
Q80X90	Flnb	0.957401	-0.0628054	0.841662	1928.45	11	114	139	277.8	Filamin-B	Mus musculus
Q60930	Vdac2,Vdac6	0.955211	-0.0661091	0.882801	834.771	3	24	24	31.7	Voltage-dependent anion-selective channel protein 2	Mus musculus
Q80X73	Pelo	0.954938	-0.0665204	0.938417	2263.68	2	18	18	43.3	Protein pelota homolog	Mus musculus
Q8BX90	Fndc3a,D14Ertd453e,Fndc3,Kiaa0970	0.954933	-0.0665278	0.881563	1097.07	2	18	18	132	Fibronectin type-III domain-containing protein 3A	Mus musculus
Q9Z0Y1	Dctn3	0.954496	-0.0671892	0.949173	3500.48	2	18	18	21	Dynactin subunit 3	Mus musculus
Q6NV83	U2surp,Sr140	0.953112	-0.0692818	0.789809	1408.79	13	133	142	118.3	U2 snRNP-associated SURP motif-containing protein	Mus musculus
Q8BMC4	Nop9	0.951288	-0.0720466	0.868795		1	9	9	70	Nucleolar protein 9	Mus musculus
Q9D8B3	Chmp4b	0.950882	-0.0726623	0.893011	1355.78	2	18	23	24.9	Charged multivesicular body protein 4b	Mus musculus
Q9CWN7	Cnot11,D1Bwg0212e	0.950868	-0.0726823	0.902607	1402.39	2	16	23	55	CCR4-NOT transcription complex subunit 11	Mus musculus
P60766	Cdc42	0.950603	-0.0730851	0.870698	782.64	2	26	31	21.3	Cell division control protein 42 homolog	Mus musculus
P62962	Pfn1	0.950011	-0.0739844	0.899761	369.456	3	21	21	15	Profilin-1	Mus musculus
Q06180	Ptpn2,Ptpt	0.94964	-0.0745479	0.812551		1	9	9	47.4	Tyrosine-protein phosphatase non-receptor type 2	Mus musculus
Q5SWD9	Tsr1,Kiaa1401	0.946414	-0.0794571	0.856026	1297.66	6	51	75	92.1	Pre-rRNA-processing protein TSR1 homolog	Mus musculus
Q9CWW6	Pin4	0.945498	-0.0808537	0.880364	1196.34	2	18	18	13.8	Peptidyl-prolyl cis-trans isomerase NIMA-interacting 4	Mus musculus
Q9JLV1	Bag3,Bis,MNCb-2243	0.945391	-0.081017	0.807271	1398.38	10	89	89	61.9	BAG family molecular chaperone regulator 3	Mus musculus
Q9D805	Capn9,Ncl4	0.942768	-0.0850246	0.878021		1	6	6	79	Calpain-9	Mus musculus
Q60775	Elf1	0.942023	-0.0861659	0.733411		1	9	9	66.2	ETS-related transcription factor Elf-1	Mus musculus
Q9CQ06	Mrpl24	0.941505	-0.0869598	0.932005	2015.89	2	16	16	24.9	39S ribosomal protein L24, mitochondrial	Mus musculus
P26443	Glud1,Glud	0.9401	-0.0891136	0.893117	1552.94	4	31	31	61.3	Glutamate dehydrogenase 1, mitochondrial	Mus musculus
Q8BKS9	Pum3,D19Bwg1357e,Kiaa0020	0.939588	-0.0898994	0.778279		1	9	9	72.8	Pumilio homolog 3	Mus musculus
P20060	Hexb	0.937085	-0.0937479	0.807271		1	9	9	61.1	Beta-hexosaminidase subunit beta	Mus musculus
Q6S5J6	Krit1,Ccm1	0.936761	-0.0942474	0.913592		1	9	9	84	Krev interaction trapped protein 1	Mus musculus
Q99MR6	Srrt,Ars2,Asr2	0.936577	-0.0945307	0.737839	980.55	12	116	123	100.5	Serrate RNA effector molecule homolog	Mus musculus
Q7TPD1	Fbxo11	0.935031	-0.0969132	0.810296		1	8	8	103.7	F-box only protein 11	Mus musculus
Q6PIJ4	Nfrkb	0.934275	-0.0980816	0.674777	255.556	2	18	18	138.8	Nuclear factor related to kappa-B-binding protein	Mus musculus
Q9D1Q6	Erp44,Kiaa0573,Txndc4	0.933941	-0.0985972	0.86741		1	9	9	46.9	Endoplasmic reticulum resident protein 44	Mus musculus
Q99M28	Rnps1	0.932925	-0.100167	0.839162	1228.87	5	46	64	34.2	RNA-binding protein with serine-rich domain 1	Mus musculus
Q62191	Trim21,Ro52,Ssa1	0.93135	-0.102605	0.79292		1	9	9	54.2	E3 ubiquitin-protein ligase TRIM21	Mus musculus
Q70FJ1	Akap9,Kiaa0803	0.93043	-0.104031	0.722594	1002.3	14	111	122	436.2	A-kinase anchor protein 9	Mus musculus
Q8VE65	Taf12	0.928014	-0.107781	0.866179	1393.49	5	44	44	17.9	Transcription initiation factor TFIID subunit 12	Mus musculus
O55222	Ilk	0.927533	-0.10853	0.757586		1	9	9	51.4	Integrin-linked protein kinase	Mus musculus
Q9DCA5	Brix1,Brix,Bxdc2	0.925536	-0.111638	0.869512	775.044	3	22	22	41.2	Ribosome biogenesis protein BRX1 homolog	Mus musculus
Q6ZWX6	Eif2s1,Eif2a	0.924883	-0.112657	0.868622	1001.52	2	16	16	36.1	Eukaryotic translation initiation factor 2 subunit 1	Mus musculus
Q3V1V3	Esf1,Abtap	0.92459	-0.113114	0.905199	1625.86	2	16	16	98	ESF1 homolog	Mus musculus
Q69ZQ2	Isy1,Kiaa1160	0.924578	-0.113133	0.744456		1	9	9	33	Pre-mRNA-splicing factor ISY1 homolog	Mus musculus
Q80YQ8	Rmnd5a	0.924269	-0.113615	0.922153	1576.83	2	13	13	44	Protein RMD5 homolog A	Mus musculus
P97363	Sptlc2,Lcb2	0.924003	-0.11403	0.758784		1	9	9	63	Serine palmitoyltransferase 2	Mus musculus
Q8R2N2	Utp4,Cirh1a,Kiaa1988,Tex292	0.92277	-0.115957	0.732047		1	9	9	76.9	U3 small nucleolar RNA-associated protein 4 homolog	Mus musculus
P97821	Ctsc	0.9218	-0.117474	0.881563	1076.06	2	13	13	52.4	Dipeptidyl peptidase 1	Mus musculus
E9Q5C9	Nolc1,Kiaa0035	0.920039	-0.120233	0.611372	1082.06	19	206	215	73.7	Nucleolar and coiled-body phosphoprotein 1	Mus musculus
P12815	Pdcd6,Alg2	0.919875	-0.12049	0.899761		1	9	16	21.9	Programmed cell death protein 6	Mus musculus
Q9CPR4	Rpl17	0.918446	-0.122733	0.74318	1850.78	20	252	277	21.4	60S ribosomal protein L17	Mus musculus
Q91WQ3	Yars	0.918233	-0.123068	0.648848	691.504	7	72	81	59.1	Tyrosine--tRNA ligase, cytoplasmic	Mus musculus
P05132	Prkaca,Pkaca	0.916943	-0.125095	0.869543		1	6	6	40.6	cAMP-dependent protein kinase catalytic subunit alpha	Mus musculus
O88967	Yme1l1	0.916756	-0.12539	0.829432	924.126	2	18	18	80	ATP-dependent zinc metalloprotease YME1L1	Mus musculus
P56379	Mp68	0.916143	-0.126355	0.882801		1	9	9	6.7	6.8 kDa mitochondrial proteolipid	Mus musculus
Q9ERD7	Tubb3	0.915094	-0.128008	0.829177	730.396	4	30	30	50.4	Tubulin beta-3 chain	Mus musculus
P62830	Rpl23	0.912856	-0.131541	0.803363	1647.3	12	127	169	14.9	60S ribosomal protein L23	Mus musculus
P98078	Dab2,Doc2	0.911652	-0.133445	0.913592	1745.52	4	25	25	82.3	Disabled homolog 2	Mus musculus
Q8VHE0	Sec63,Sec63l	0.911387	-0.133865	0.640587		1	9	9	87.9	Translocation protein SEC63 homolog	Mus musculus
P59708	Sf3b6,Sf3b14	0.910452	-0.135346	0.932388	2368.78	2	16	16	14.6	Splicing factor 3B subunit 6	Mus musculus
P97805	Fam3d,Oit1	0.909857	-0.136289	0.583901		1	9	9	25	Protein FAM3D	Mus musculus
P39749	Fen1,Fen-1	0.90915	-0.13741	0.74318	875.976	5	62	69	42.3	Flap endonuclease 1	Mus musculus
Q9D4J7	Phf6,Kiaa1823	0.908509	-0.138427	0.486202	289.682	5	45	45	41.1	PHD finger protein 6	Mus musculus
Q9DBR7	Ppp1r12a,Mypt1	0.908239	-0.138856	0.393134	1456.96	78	910	951	115	Protein phosphatase 1 regulatory subunit 12A	Mus musculus
P11087	Col1a1,Cola1	0.907905	-0.139387	0.815715	937.157	3	24	30	138	Collagen alpha-1(I) chain	Mus musculus
Q9JL19	Ncoa6,Aib3,Prip,Rap250,Trbp	0.906564	-0.141519	0.61356	533.631	7	63	63	219.7	Nuclear receptor coactivator 6	Mus musculus
Q8VED5	Krt79,Kb38	0.906185	-0.142123	0.880397		1	8	8	57.6	Keratin, type II cytoskeletal 79	Mus musculus
Q60862	Orc2,Orc2l	0.906066	-0.142312	0.384506		1	9	9	65.9	Origin recognition complex subunit 2	Mus musculus
Q8BGD9	Eif4b	0.906048	-0.142341	0.681358	1348.64	17	203	218	68.8	Eukaryotic translation initiation factor 4B	Mus musculus
Q9Z1M8	Ik,Red,Rer	0.90512	-0.143819	0.731403	909.271	8	69	69	65.6	Protein Red	Mus musculus
Q99PP6	Trim34a	0.904395	-0.144974	0.898028	1349.05	2	14	23	55.9	Tripartite motif-containing protein 34A	Mus musculus
Q99NB9	Sf3b1,Sap155	0.903898	-0.145769	0.488001	778.064	26	221	256	145.8	Splicing factor 3B subunit 1	Mus musculus
P43274	Hist1h1e,H1f4	0.903184	-0.146908	0.90185	2441.23	5	54	54	22	Histone H1.4	Mus musculus
Q9JJ89	Ccdc86,Cyclon,D19Ertd678e,MNCb-4327	0.902465	-0.148057	0.564667	669.046	11	106	106	46.5	Coiled-coil domain-containing protein 86	Mus musculus
Q6ZPV2	Ino80,Inoc1,Kiaa1259	0.90093	-0.150513	0.850728		1	9	9	176.5	DNA helicase INO80	Mus musculus
Q8CAQ8	Immt,Mic60	0.900495	-0.15121	0.364393	581.212	22	210	223	83.9	MICOS complex subunit Mic60	Mus musculus
Q8C6B9	Rps19bp1,Aros	0.897418	-0.156147	0.846606	1161.87	3	27	27	16	Active regulator of SIRT1	Mus musculus
Q9CXG3	Ppil4	0.895362	-0.159456	0.696307		1	9	9	57.2	Peptidyl-prolyl cis-trans isomerase-like 4	Mus musculus
Q8CBY3	Leng8	0.894955	-0.160112	0.66224		1	8	8	86.8	Leukocyte receptor cluster member 8 homolog	Mus musculus
Q9DBJ3	Baiap2l1,Irtks	0.893311	-0.162765	0.807271		1	7	7	57.2	Brain-specific angiogenesis inhibitor 1-associated protein 2-like protein 1	Mus musculus
C0LLJ0	Kpna7	0.892862	-0.163491	0.924917	2225.01	2	17	17	55.5	Importin subunit alpha-8	Mus musculus
P26231	Ctnna1,Catna1	0.892139	-0.164659	0.7693	837.129	5	41	48	100.1	Catenin alpha-1	Mus musculus
Q05144	Rac2	0.891358	-0.165924	0.903799		1	3	3	21.4	Ras-related C3 botulinum toxin substrate 2	Mus musculus
Q99PT3	Ino80b,Hmga1l4,Papa1,Znhit4	0.890769	-0.166876	0.683657		1	9	9	40.6	INO80 complex subunit B	Mus musculus
Q91XU3	Pip4k2c,Pip5k2c	0.889109	-0.169568	0.737344	412.275	2	18	18	47.3	Phosphatidylinositol 5-phosphate 4-kinase type-2 gamma	Mus musculus
P14576	Srp54	0.888519	-0.170525	0.833276	1187.03	4	26	26	55.7	Signal recognition particle 54 kDa protein	Mus musculus
A2AJ76	Hmcn2	0.888337	-0.17082	0.877564		1	7	7	547.2	Hemicentin-2	Mus musculus
O54791	Maff	0.887897	-0.171536	0.868795		1	7	14	17	Transcription factor MafF	Mus musculus
Q56A08	Gpkow	0.887734	-0.1718	0.936755		1	4	4	53.8	G patch domain and KOW motifs-containing protein	Mus musculus
Q80TH2	Erbb2ip,Erbin,Kiaa1225,Lap2	0.885944	-0.174712	0.75802		1	9	9	157.2	Erbin	Mus musculus
Q8C7Q4	Rbm4,Rbm4a	0.884507	-0.177054	0.841342		1	6	6	40	RNA-binding protein 4	Mus musculus
Q91YN9	Bag2	0.883774	-0.178251	0.671721		1	9	9	23.5	BAG family molecular chaperone regulator 2	Mus musculus
Q99020	Hnrnpab,Cbf-a,Cgbfa,Hnrpab	0.883766	-0.178264	0.487131	604.379	15	168	191	30.8	Heterogeneous nuclear ribonucleoprotein A/B	Mus musculus
Q99K48	Nono	0.882553	-0.180246	0.528689	1074.66	32	316	406	54.5	Non-POU domain-containing octamer-binding protein	Mus musculus
C0HKD8	Mfap1a	0.881922	-0.181278	0.657531	508.759	4	36	36	52	Microfibrillar-associated protein 1A	Mus musculus
Q99PV0	Prpf8,Prp8	0.878866	-0.186286	0.600416	717.405	11	96	112	273.6	Pre-mRNA-processing-splicing factor 8	Mus musculus
Q3UMC0	Spata5,Spaf	0.878577	-0.186759	0.62405	491.997	6	54	54	97.3	Spermatogenesis-associated protein 5	Mus musculus
Q8R1F0	D8Ertd738e	0.875989	-0.191016	0.715838	781.966	6	53	53	10.2	Leydig cell tumor 10 kDa protein homolog	Mus musculus
Q9DCR2	Ap3s1	0.874952	-0.192724	0.796739		1	9	16	21.7	AP-3 complex subunit sigma-1	Mus musculus
Q8C0M9	Asrgl1	0.874174	-0.194007	0.843254		1	9	9	33.9	Isoaspartyl peptidase/L-asparaginase	Mus musculus
Q9JJU8	Sh3bgrl	0.873397	-0.19529	0.286738		1	9	9	12.8	SH3 domain-binding glutamic acid-rich-like protein	Mus musculus
Q8BP71	Rbfox2,Fox2,Fxh,Hrnbp2,Rbm9	0.873036	-0.195887	0.397697		1	9	9	47.3	RNA binding protein fox-1 homolog 2	Mus musculus
Q9R0Q4	Morf4l2,Kiaa0026,Sid393	0.87188	-0.197799	0.723459	874.131	7	63	63	32.2	Mortality factor 4-like protein 2	Mus musculus
Q9JI44	Dmap1,Mmtr	0.869517	-0.201714	0.63992	713.417	8	67	67	53.1	DNA methyltransferase 1-associated protein 1	Mus musculus
Q7TNV0	Dek	0.865472	-0.20844	0.62405	759.007	10	103	112	43.2	Protein DEK	Mus musculus
Q8BH60	Gopc	0.864634	-0.209838	0.874		1	7	7	50.7	Golgi-associated PDZ and coiled-coil motif-containing protein	Mus musculus
Q5XJV7	Setd5,Kiaa1757	0.863951	-0.210979	0.587657		1	7	16	157.4	SET domain-containing protein 5	Mus musculus
P35979	Rpl12	0.863238	-0.21217	0.723499	1125.17	11	108	120	17.8	60S ribosomal protein L12	Mus musculus
P09411	Pgk1,Pgk-1	0.862601	-0.213234	0.66224	739.258	8	70	106	44.6	Phosphoglycerate kinase 1	Mus musculus
P11672	Lcn2	0.861102	-0.215743	0.589798		1	9	9	22.9	Neutrophil gelatinase-associated lipocalin	Mus musculus
Q9QXL2	Kif21a,Kiaa1708	0.861038	-0.215851	0.642237		1	8	8	186.5	Kinesin-like protein KIF21A	Mus musculus
Q8CGC4	Lsm14b,Fam61b,Rap55b	0.860371	-0.216968	0.622275	356.062	4	36	36	42.3	Protein LSM14 homolog B	Mus musculus
Q60668	Hnrnpd,Auf1,Hnrpd	0.860294	-0.217099	0.602216	786.792	12	113	138	38.4	Heterogeneous nuclear ribonucleoprotein D0	Mus musculus
P18654	Rps6ka3,Mapkapk1b,Rps6ka-rs1,Rsk2	0.859766	-0.217985	0.725301	15.1626	2	16	16	83.7	Ribosomal protein S6 kinase alpha-3	Mus musculus
P97372	Psme2,Pa28b1	0.859415	-0.218574	0.608988		1	9	9	27.1	Proteasome activator complex subunit 2	Mus musculus
Q08288	Lyar	0.859335	-0.218707	0.573902	513.354	5	49	49	43.7	Cell growth-regulating nucleolar protein	Mus musculus
Q923D4	Sf3b5,Sf3b10	0.857901	-0.221117	0.723499	573.016	2	18	18	10.1	Splicing factor 3B subunit 5	Mus musculus
Q0P678	Zc3h18,Nhn1	0.855863	-0.224548	0.386922	494.887	11	120	120	105.7	Zinc finger CCCH domain-containing protein 18	Mus musculus
Q8K003	Tma7,Ccdc72	0.854644	-0.226605	0.779542	1004.07	6	52	52	7.1	Translation machinery-associated protein 7	Mus musculus
Q6PDM2	Srsf1,Sfrs1	0.853238	-0.22898	0.438886	505.901	10	117	117	27.7	Serine/arginine-rich splicing factor 1	Mus musculus
Q920B9	Supt16h,Fact140,Factp140,Supt16	0.852963	-0.229445	0.47047	483.713	11	92	92	119.8	FACT complex subunit SPT16	Mus musculus
Q921F4	Hnrpll	0.851171	-0.23248	0.536436	456.497	7	65	90	64.1	Heterogeneous nuclear ribonucleoprotein L-like	Mus musculus
Q5RJG1	Nol10,Gm67	0.850482	-0.233648	0.371342	92.1974	2	18	18	80.1	Nucleolar protein 10	Mus musculus
Q8BWL5	Rbms3	0.849963	-0.234528	0.691585	800.746	7	50	50	46.9	RNA-binding motif, single-stranded-interacting protein 3	Mus musculus
P62313	Lsm6	0.848727	-0.236628	0.602216		1	9	9	9.1	U6 snRNA-associated Sm-like protein LSm6	Mus musculus
Q99KW3	Triobp,Kiaa1662,Tara	0.848722	-0.236636	0.205784	455.78	22	227	233	223.4	TRIO and F-actin-binding protein	Mus musculus
Q9D0D4	Dimt1,Dimt1l	0.84853	-0.236962	0.636844	481.891	3	27	27	35.3	Probable dimethyladenosine transferase	Mus musculus
Q7TN02	Med26,Crsp7	0.846458	-0.24049	0.605517	449.213	5	38	38	64.7	Mediator of RNA polymerase II transcription subunit 26	Mus musculus
Q91ZW3	Smarca5,Snf2h	0.845294	-0.242475	0.529848	460.894	6	54	54	121.6	SWI/SNF-related matrix-associated actin-dependent regulator of chromatin subfamily A member 5	Mus musculus
Q9Z2D1	Mtmr2	0.845019	-0.242945	0.382514	464.335	15	123	148	73.2	Myotubularin-related protein 2	Mus musculus
Q3U0V1	Khsrp,Fubp2	0.844601	-0.243659	0.34106	670.436	28	263	271	76.8	Far upstream element-binding protein 2	Mus musculus
Q61398	Pcolce,Pcpe1	0.843659	-0.245267	0.462499		1	9	9	50.2	Procollagen C-endopeptidase enhancer 1	Mus musculus
P46938	Yap1,Yap,Yap65	0.84337	-0.245762	0.749521	597.509	2	16	25	52.4	Transcriptional coactivator YAP1	Mus musculus
P62242	Rps8	0.842822	-0.2467	0.558634	1066.9	20	244	268	24.2	40S ribosomal protein S8	Mus musculus
Q05D44	Eif5b,If2	0.842339	-0.247527	0.409663	659.471	21	198	238	137.6	Eukaryotic translation initiation factor 5B	Mus musculus
P43277	Hist1h1d,H1f3	0.841704	-0.248615	0.821854	693.792	2	18	18	22.1	Histone H1.3	Mus musculus
Q9JIF0	Prmt1,Hrmt1l2,Mrmt1	0.839295	-0.25275	0.659136	506.586	4	42	42	42.4	Protein arginine N-methyltransferase 1	Mus musculus
Q9D8M4	Rpl7l1	0.836954	-0.25678	0.656682	297.167	2	14	14	28.5	60S ribosomal protein L7-like 1	Mus musculus
Q63871	Polr2k,Mt1a	0.836511	-0.257544	0.309155		1	9	9	7	DNA-directed RNA polymerases I, II, and III subunit RPABC4	Mus musculus
Q8CCF0	Prpf31,Prp31	0.835689	-0.258961	0.662704	464.21	5	38	44	55.4	U4/U6 small nuclear ribonucleoprotein Prp31	Mus musculus
P54103	Dnajc2,Mida1,Zrf1	0.83558	-0.25915	0.513715	428.59	6	45	45	71.7	DnaJ homolog subfamily C member 2	Mus musculus
Q9WV55	Vapa,Vap33	0.835422	-0.259423	0.597613	466.919	3	36	36	27.9	Vesicle-associated membrane protein-associated protein A	Mus musculus
Q9QZ67	Ppm1d,Wip1	0.833	-0.263611	0.89006		1	7	7	65.7	Protein phosphatase 1D	Mus musculus
Q3UHX2	Pdap1	0.832431	-0.264597	0.418817	408.11	8	90	90	20.6	28 kDa heat- and acid-stable phosphoprotein	Mus musculus
O54962	Banf1,Baf,Bcrp1,L2bp1	0.830705	-0.267592	0.744456	677.692	4	36	36	10.1	Barrier-to-autointegration factor	Mus musculus
Q6A4J8	Usp7,Hausp	0.830703	-0.267596	0.577371	582.401	9	75	80	128.5	Ubiquitin carboxyl-terminal hydrolase 7	Mus musculus
Q9EPU0	Upf1,Rent1	0.830032	-0.268761	0.301721	686.048	30	309	379	124	Regulator of nonsense transcripts 1	Mus musculus
P20029	Hspa5,Grp78	0.829479	-0.269723	0.274273	819.143	42	485	527	72.4	78 kDa glucose-regulated protein	Mus musculus
Q8R5F8	Eps8l1,Eps8r1	0.827397	-0.273349	0.846606		1	5	5	80	Epidermal growth factor receptor kinase substrate 8-like protein 1	Mus musculus
Q9D0I8	Mrto4,Mrt4	0.825953	-0.275868	0.652696	439.159	3	24	31	27.5	mRNA turnover protein 4 homolog	Mus musculus
P70290	Mpp1	0.825249	-0.277099	0.361083	14.9981	2	17	23	52.2	55 kDa erythrocyte membrane protein	Mus musculus
Q68FD5	Cltc	0.824396	-0.278591	0.319684	471.455	18	146	151	191.6	Clathrin heavy chain 1	Mus musculus
Q8C0D4	Arhgap12	0.82132	-0.283983	0.517585		1	9	9	95.4	Rho GTPase-activating protein 12	Mus musculus
Q8R080	Gtse1,B99	0.818748	-0.288508	0.406852		1	9	9	78.8	G2 and S phase-expressed protein 1	Mus musculus
Q9CYH6	Rrs1,Rrr,MNCb-2643	0.817619	-0.2905	0.448846	364.365	5	38	38	41.6	Ribosome biogenesis regulatory protein homolog	Mus musculus
Q6ZQA0	Nbeal2,Kiaa0540	0.815408	-0.294406	0.722167		1	9	9	301.9	Neurobeachin-like protein 2	Mus musculus
Q921I2	Klhdc4	0.814197	-0.296549	0.751176	853.255	3	20	20	64.9	Kelch domain-containing protein 4	Mus musculus
P52480	Pkm,Pk3,Pkm2,Pykm	0.813396	-0.29797	0.544683	743.424	13	132	167	57.8	Pyruvate kinase PKM	Mus musculus
Q9ESK4	Ing2,Ing1l	0.813277	-0.298181	0.804381	682.484	2	14	14	33	Inhibitor of growth protein 2	Mus musculus
P62245	Rps15a	0.813038	-0.298605	0.541946	674.725	11	110	137	14.8	40S ribosomal protein S15a	Mus musculus
Q6NZM9	Hdac4	0.812783	-0.299057	0.497329		1	9	9	118.6	Histone deacetylase 4	Mus musculus
Q99KP6	Prpf19,Prp19,Snev	0.81229	-0.299933	0.326461	357.035	7	72	72	55.2	Pre-mRNA-processing factor 19	Mus musculus
Q61127	Nab2	0.812053	-0.300354	0.817883		1	3	3	56.6	NGFI-A-binding protein 2	Mus musculus
Q8BYP3	Rhof,Arhf	0.811285	-0.301719	0.680207		1	9	9	23.6	Rho-related GTP-binding protein RhoF	Mus musculus
Q6ZWV3	Rpl10,Qm	0.810695	-0.302768	0.778433	1025.89	5	49	65	24.6	60S ribosomal protein L10	Mus musculus
P62700	Ypel5	0.810637	-0.302872	0.60346	298.442	3	24	24	13.8	Protein yippee-like 5	Mus musculus
O55023	Impa1	0.80939	-0.305094	0.395234		1	9	9	30.4	Inositol monophosphatase 1	Mus musculus
Q8R197	Olah,Thedc1	0.808451	-0.306767	0.417841		1	5	5	30.2	S-acyl fatty acid synthase thioesterase, medium chain	Mus musculus
B2RY56	Rbm25	0.808066	-0.307455	0.26854	370.562	10	112	123	99.6	RNA-binding protein 25	Mus musculus
E9Q8D0	Dnajc21	0.807426	-0.308598	0.530576	243.454	2	11	11	61.7	DnaJ homolog subfamily C member 21	Mus musculus
P12970	Rpl7a,Surf-3,Surf3	0.805855	-0.311408	0.387331	728.77	23	229	237	30	60S ribosomal protein L7a	Mus musculus
Q8C1S0	Med19	0.803457	-0.315708	0.812551	591.541	2	10	10	26.3	Mediator of RNA polymerase II transcription subunit 19	Mus musculus
P62141	Ppp1cb	0.803213	-0.316145	0.823883	1041.01	3	27	27	37.2	Serine/threonine-protein phosphatase PP1-beta catalytic subunit	Mus musculus
Q810V0	Mphosph10	0.801543	-0.319149	0.549589	366.679	4	33	33	78.7	U3 small nucleolar ribonucleoprotein protein MPP10	Mus musculus
Q9JK92	Hspb8,Cryac,Hsp22	0.798974	-0.323779	0.0586463		1	9	9	21.5	Heat shock protein beta-8	Mus musculus
Q9D7S7	Rpl22l1	0.798586	-0.324479	0.47047	637.128	9	85	130	14.5	60S ribosomal protein L22-like 1	Mus musculus
P23242	Gja1,Cxn-43	0.798391	-0.324834	0.701495	502.169	2	17	17	43	Gap junction alpha-1 protein	Mus musculus
P84104	Srsf3,Sfrs3,Srp20,X16	0.796338	-0.328547	0.599817	634.308	7	77	101	19.3	Serine/arginine-rich splicing factor 3	Mus musculus
Q922F4	Tubb6	0.795062	-0.330862	0.573369	351.011	4	27	41	50.1	Tubulin beta-6 chain	Mus musculus
Q80X82	Sympk	0.793848	-0.333065	0.57576	358.706	2	17	17	142.3	Symplekin	Mus musculus
O08579	Emd,Sta	0.792844	-0.334891	0.701734		1	9	9	29.4	Emerin	Mus musculus
O70422	Gtf2h4	0.792637	-0.335268	0.228034		1	9	9	52.2	General transcription factor IIH subunit 4	Mus musculus
Q8BRH4	Kmt2c,Mll3	0.789621	-0.340768	0.780036		1	7	7	540.2	Histone-lysine N-methyltransferase 2C	Mus musculus
Q9CXI5	Manf,Armet	0.78881	-0.34225	0.362279	170.096	3	27	27	20.4	Mesencephalic astrocyte-derived neurotrophic factor	Mus musculus
Q9D0F6	Rfc5	0.788668	-0.34251	0.489635	132.885	3	31	44	38.1	Replication factor C subunit 5	Mus musculus
O55142	Rpl35a	0.787381	-0.344866	0.658227	616.456	5	46	60	12.6	60S ribosomal protein L35a	Mus musculus
Q8CCI5	Rybp,Dedaf	0.785022	-0.349195	0.298334		1	9	9	24.8	RING1 and YY1-binding protein	Mus musculus
Q61990	Pcbp2,Cbp,Hnrnpx,Hnrpx	0.784465	-0.350219	0.488001	356.77	6	40	49	38.2	Poly(rC)-binding protein 2	Mus musculus
Q91VF5	Emid1,Emu1	0.784403	-0.350333	0.60513	435.043	2	18	18	45.6	EMI domain-containing protein 1	Mus musculus
P99029	Prdx5,Prdx6	0.784273	-0.350573	0.206731	280.372	8	89	104	21.9	Peroxiredoxin-5, mitochondrial	Mus musculus
Q8R409	Hexim1,Clp1	0.783915	-0.351231	0.187132		1	9	9	40.2	Protein HEXIM1	Mus musculus
Q61136	Prpf4b,Cbp143,Prp4h,Prp4k,Prp4m,Prpk	0.78068	-0.357196	0.490323	682.472	16	143	166	117	Serine/threonine-protein kinase PRP4 homolog	Mus musculus
Q8R1S4	Mtss1,Mim	0.779925	-0.358593	0.778893	794.493	2	17	17	82.4	Metastasis suppressor protein 1	Mus musculus
Q8VHP6	Cdhr1,Kiaa1775,Pcdh21,Prcad	0.779906	-0.358628	0.701989		1	9	9	94	Cadherin-related family member 1	Mus musculus
Q6VN19	Ranbp10,Kiaa1464	0.779297	-0.359756	0.441213	376.095	5	51	51	67.2	Ran-binding protein 10	Mus musculus
O08715	Akap1,Akap	0.778185	-0.361816	0.262557	227.055	3	44	53	92.2	A-kinase anchor protein 1, mitochondrial	Mus musculus
Q63943	Mef2d	0.77544	-0.366912	0.638208		1	6	6	55.1	Myocyte-specific enhancer factor 2D	Mus musculus
Q76KJ5	Cd3eap,Ase1,Paf49	0.775189	-0.36738	0.209679	331.252	10	94	94	43.1	DNA-directed RNA polymerase I subunit RPA34	Mus musculus
B1AZI6	Thoc2	0.773958	-0.369673	0.174245	266.029	8	70	70	182.8	THO complex subunit 2	Mus musculus
P34152	Ptk2,Fadk,Fak,Fak1,Kiaa4203	0.77211	-0.373121	0.241734		1	9	9	123.5	Focal adhesion kinase 1	Mus musculus
Q99LM2	Cdk5rap3	0.771721	-0.373848	0.555337		1	9	9	57	CDK5 regulatory subunit-associated protein 3	Mus musculus
Q61686	Cbx5,Hp1a	0.771379	-0.374488	0.462499	233.073	2	18	18	22.2	Chromobox protein homolog 5	Mus musculus
Q3TWW8	Srsf6,Sfrs6,Srp55	0.770309	-0.376491	0.248551	341.217	12	108	108	39	Serine/arginine-rich splicing factor 6	Mus musculus
P58468	Fam207a	0.769943	-0.377176	0.2801	269.633	6	54	59	24.8	Protein FAM207A	Mus musculus
Q62465	Vat1,Vat-1	0.76989	-0.377275	0.611553		1	9	9	43.1	Synaptic vesicle membrane protein VAT-1 homolog	Mus musculus
Q91YE7	Rbm5,Luca15	0.769723	-0.37759	0.39113		1	6	6	92.3	RNA-binding protein 5	Mus musculus
P18608	Hmgn1,Hmg-14,Hmg14	0.769015	-0.378916	0.669263	579.935	4	36	36	10.2	Non-histone chromosomal protein HMG-14	Mus musculus
A2AR02	Ppig	0.767197	-0.382331	0.558634	432.481	7	47	47	88.3	Peptidyl-prolyl cis-trans isomerase G	Mus musculus
P62301	Rps13	0.766946	-0.382803	0.381747	729.499	21	242	249	17.2	40S ribosomal protein S13	Mus musculus
P32233	Drg1,Drg,Nedd-3,Nedd3	0.765929	-0.384717	0.317512	337.64	8	79	88	40.5	Developmentally-regulated GTP-binding protein 1	Mus musculus
Q9JJ28	Flii,Fli1,Fliih	0.76497	-0.386525	0.110979	213.28	9	77	77	144.8	Protein flightless-1 homolog	Mus musculus
P68040	Gnb2l1,Gnb2-rs1	0.764882	-0.38669	0.189548	314.45	11	104	118	35.1	Guanine nucleotide-binding protein subunit beta-2-like 1	Mus musculus
P36916	Gnl1,Gna-rs1,Mmr1	0.763942	-0.388465	0.291262	58.1889	2	18	18	68.8	Guanine nucleotide-binding protein-like 1	Mus musculus
Q62167	Ddx3x,D1Pas1-rs2,Ddx3,Dead3,Erh	0.763894	-0.388556	0.169579	426.889	20	203	237	73.1	ATP-dependent RNA helicase DDX3X	Mus musculus
A2RSY6	Trmt1l	0.763564	-0.389179	0.12778	160.918	6	52	52	80.9	TRMT1-like protein	Mus musculus
P59111	Kcnh8	0.762217	-0.391726	0.169717		1	9	9	123.3	Potassium voltage-gated channel subfamily H member 8	Mus musculus
Q4FK66	Prpf38a	0.762147	-0.391859	0.594057	354.741	2	18	18	37.4	Pre-mRNA-splicing factor 38A	Mus musculus
Q8QZY9	Sf3b4	0.759606	-0.396676	0.64414	390.418	2	18	18	44.4	Splicing factor 3B subunit 4	Mus musculus
P51125	Cast	0.759155	-0.397533	0.177887	258.725	7	71	71	84.9	Calpastatin	Mus musculus
Q80W00	Ppp1r10,Cat53,Pnuts	0.758493	-0.398792	0.487131	273.967	2	17	17	94.4	Serine/threonine-protein phosphatase 1 regulatory subunit 10	Mus musculus
P62849	Rps24	0.758458	-0.398858	0.497329	686.247	12	131	166	15.4	40S ribosomal protein S24	Mus musculus
P49138	Mapkapk2,Rps6kc1	0.756932	-0.401765	0.300344		1	9	9	44	MAP kinase-activated protein kinase 2	Mus musculus
Q91V64	Isoc1	0.755375	-0.404734	0.110135		1	9	9	32	Isochorismatase domain-containing protein 1	Mus musculus
Q7TMY4	Thoc7,Nif3l1bp1	0.755303	-0.404873	0.335428		1	9	17	23.7	THO complex subunit 7 homolog	Mus musculus
P28659	Celf1,Brunol2,Cugbp,Cugbp1	0.754814	-0.405807	0.351736		1	9	9	52.1	CUGBP Elav-like family member 1	Mus musculus
Q91W39	Ncoa5	0.752862	-0.409543	0.423427		1	7	7	65.3	Nuclear receptor coactivator 5	Mus musculus
O35134	Polr1a,Rpa1,Rpo1-4	0.752476	-0.410283	0.0492384	338.593	25	264	302	194.1	DNA-directed RNA polymerase I subunit RPA1	Mus musculus
Q8K2I1	Fntb	0.752352	-0.410521	0.513798		1	9	9	48.8	Protein farnesyltransferase subunit beta	Mus musculus
P35293	Rab18	0.751849	-0.411485	0.448249	299.012	4	34	34	23	Ras-related protein Rab-18	Mus musculus
Q9WVG6	Carm1,Prmt4	0.751775	-0.411627	0.158333	96.5369	3	25	25	65.9	Histone-arginine methyltransferase CARM1	Mus musculus
Q99PN3	Trim26,Znf173	0.751656	-0.411856	0.506301		1	9	9	62.8	Tripartite motif-containing protein 26	Mus musculus
E9PZQ0	Ryr1	0.7516	-0.411964	0.626187		1	9	9	565	Ryanodine receptor 1	Mus musculus
Q9DBM1	Gpatch1,Gpatc1	0.75156	-0.412039	0.122733	367.37	18	154	170	103	G patch domain-containing protein 1	Mus musculus
Q99JF8	Psip1,Ledgf	0.750855	-0.413394	0.354125	317.624	6	54	54	59.7	PC4 and SFRS1-interacting protein	Mus musculus
Q60634	Flot2,Esa1,M17s1	0.750446	-0.41418	0.416255		1	8	8	47	Flotillin-2	Mus musculus
Q8K194	Snrnp27	0.749352	-0.416285	0.280494	229.764	5	42	42	18.9	U4/U6.U5 small nuclear ribonucleoprotein 27 kDa protein	Mus musculus
P34884	Mif	0.749308	-0.416368	0.658706		1	7	7	12.5	Macrophage migration inhibitory factor	Mus musculus
Q8BL97	Srsf7,Sfrs7	0.749021	-0.416923	0.696307	657.456	5	40	40	30.8	Serine/arginine-rich splicing factor 7	Mus musculus
P62702	Rps4x,Rps4	0.747998	-0.418894	0.0459808	499.425	43	526	584	29.6	40S ribosomal protein S4, X isoform	Mus musculus
Q8BHB4	Wdr3	0.746678	-0.421442	0.460323		1	9	9	105.8	WD repeat-containing protein 3	Mus musculus
Q5SU73	Coil,CLN80	0.745382	-0.423948	0.364393	312.122	5	50	50	61.9	Coilin	Mus musculus
Q91VN6	Ddx41	0.745058	-0.424576	0.0742629	351.659	25	240	254	69.8	Probable ATP-dependent RNA helicase DDX41	Mus musculus
P99027	Rplp2	0.744876	-0.424928	0.293706	356.272	6	66	94	11.7	60S acidic ribosomal protein P2	Mus musculus
Q9D903	Ebna1bp2,Ebp2	0.744576	-0.425508	0.20979	183.001	4	35	42	34.7	Probable rRNA-processing protein EBP2	Mus musculus
Q9R099	Tbl2	0.744285	-0.426073	0.288525		1	8	8	49.6	Transducin beta-like protein 2	Mus musculus
Q9QYS9	Qki,Qk,Qk1,Qka1	0.743546	-0.427506	0.192709	271.802	9	86	86	37.7	Protein quaking	Mus musculus
O35286	Dhx15,Ddx15,Deah9	0.742382	-0.429766	0.175935	293.406	13	116	122	91	Pre-mRNA-splicing factor ATP-dependent RNA helicase DHX15	Mus musculus
Q6P5B0	Rrp12,Kiaa0690	0.742376	-0.429779	0.14927	237.312	8	80	80	143.1	RRP12-like protein	Mus musculus
Q8VHZ7	Imp4,D1Wsu40e	0.741188	-0.432089	0.114388		1	9	9	33.7	U3 small nucleolar ribonucleoprotein protein IMP4	Mus musculus
Q8VBV4	Fbxw7 {ECO:0000312|MGI:MGI:1354695},Fbw7 {ECO:0000305},Fbwd6 {ECO:0000312|EMBL:AAL50052.1},	0.740703	-0.433032	0.0816566		1	9	9	70.5	F-box/WD repeat-containing protein 7	Mus musculus
Q99LJ0	Cttnbp2nl,Kiaa1433	0.738427	-0.437472	0.556118	318.568	2	17	17	69.8	CTTNBP2 N-terminal-like protein	Mus musculus
P63276	Rps17	0.737669	-0.438954	0.398491	647.912	15	164	240	15.5	40S ribosomal protein S17	Mus musculus
Q61881	Mcm7,Cdc47,Mcmd7	0.737311	-0.439655	0.404651		1	8	8	81.2	DNA replication licensing factor MCM7	Mus musculus
Q9CQU5	Zwint,D10Ertd749e	0.736909	-0.440442	0.214624		1	9	9	28.7	ZW10 interactor	Mus musculus
P53026	Rpl10a,Nedd-6,Nedd6	0.735936	-0.442349	0.242938	390.407	10	125	142	24.9	60S ribosomal protein L10a	Mus musculus
Q91YR7	Prpf6	0.735932	-0.442356	0.164118	297.542	12	111	118	106.7	Pre-mRNA-processing factor 6	Mus musculus
Q61464	Znf638,Np220,Zfml	0.732728	-0.44865	0.165922	243.077	7	68	68	218.1	Zinc finger protein 638	Mus musculus
Q8BL48	Unk,Kiaa1753,Zc3h5,Zc3hdc5	0.72829	-0.457416	0.221843	28.8555	2	18	18	88.1	RING finger protein unkempt homolog	Mus musculus
Q8C0T5	Sipa1l1,Kiaa0440	0.728242	-0.45751	0.348275	247.89	3	27	27	197	Signal-induced proliferation-associated 1-like protein 1	Mus musculus
Q62470	Itga3	0.728147	-0.457697	0.0571628		1	9	9	116.7	Integrin alpha-3	Mus musculus
Q8C9B9	Dido1,Datf1,Dio1	0.727375	-0.459229	0.00525857	169.963	16	142	142	247.2	Death-inducer obliterator 1	Mus musculus
Q924H2	Med15,Pcqap	0.726741	-0.460486	0.12778	380.175	17	197	204	87.1	Mediator of RNA polymerase II transcription subunit 15	Mus musculus
Q9Z315	Sart1,Haf	0.726166	-0.46163	0.052711	281.69	20	168	186	90.9	U4/U6.U5 tri-snRNP-associated protein 1	Mus musculus
Q569Z5	Ddx46,Kiaa0801	0.723301	-0.467332	0.132086	301.177	14	118	132	117.4	Probable ATP-dependent RNA helicase DDX46	Mus musculus
Q6ZQ88	Kdm1a,Aof2,Kiaa0601,Lsd1	0.722881	-0.46817	0.201222		1	9	9	92.9	Lysine-specific histone demethylase 1A	Mus musculus
Q8BKT7	Thoc5,Fmip,Kiaa0983	0.722467	-0.468996	0.487131	319.078	6	40	47	78.7	THO complex subunit 5 homolog	Mus musculus
Q9D864	Actr6	0.722003	-0.469923	0.36929	118.833	2	17	23	45.8	Actin-related protein 6	Mus musculus
Q3USH5	Sfswap,Sfrs8,Srsf8,Swap	0.721579	-0.47077	0.421179	245.996	3	26	26	104.2	Splicing factor, suppressor of white-apricot homolog	Mus musculus
O35737	Hnrnph1,Hnrph,Hnrph1	0.720811	-0.472307	0.48499	406.651	5	46	46	49.2	Heterogeneous nuclear ribonucleoprotein H	Mus musculus
Q9D1A2	Cndp2,Cn2	0.71988	-0.474172	0.281235		1	9	9	52.8	Cytosolic non-specific dipeptidase	Mus musculus
Q5HZG4	Taf3	0.71894	-0.476057	0.159581	301.601	8	85	85	105.1	Transcription initiation factor TFIID subunit 3	Mus musculus
Q6P8I4	Pcnp	0.718807	-0.476323	0.0446238	102.833	5	54	54	19	PEST proteolytic signal-containing nuclear protein	Mus musculus
O70551	Srpk1	0.717681	-0.478586	0.426538	275.742	3	34	43	73.1	SRSF protein kinase 1	Mus musculus
Q8BFR4	Gns	0.716059	-0.481849	0.264354	229.101	5	45	45	61.2	N-acetylglucosamine-6-sulfatase	Mus musculus
Q8R3N6	Thoc1,Hpr1	0.713869	-0.486269	0.0526284	145.519	7	63	71	75.4	THO complex subunit 1	Mus musculus
Q9ESX4	Zcchc17,Ps1d,Ldc4	0.713194	-0.487634	0.280444	439.32	8	100	107	27.5	Nucleolar protein of 40 kDa	Mus musculus
Q9EST3	Eif4enif1,Clast4	0.712951	-0.488126	0.247791	218.115	5	36	36	108	Eukaryotic translation initiation factor 4E transporter	Mus musculus
Q924Z4	Cers2,Lass2,Trh3	0.712184	-0.489678	0.213786		1	9	9	45	Ceramide synthase 2	Mus musculus
Q8VHA6	Asb18	0.712136	-0.489775	0.199184		1	9	9	50.7	Ankyrin repeat and SOCS box protein 18	Mus musculus
Q8CGI1	Fam193a	0.711045	-0.491988	0.154875		1	9	9	136.7	Protein FAM193A	Mus musculus
P14115	Rpl27a	0.711023	-0.492032	0.391985	690.364	20	198	198	16.6	60S ribosomal protein L27a	Mus musculus
Q8K202	Polr1e,Paf53,Praf1	0.710693	-0.492701	0.236475	317.131	9	74	82	54	DNA-directed RNA polymerase I subunit RPA49	Mus musculus
Q8BKI2	Tnrc6b,Kiaa1093	0.710449	-0.493196	0.00124519	294.71	49	488	511	192	Trinucleotide repeat-containing gene 6B protein	Mus musculus
Q6ZWU9	Rps27	0.710188	-0.493726	0.494711	425.899	3	45	45	9.5	40S ribosomal protein S27	Mus musculus
Q922R8	Pdia6,Txndc7	0.708593	-0.49697	0.618227	563.443	5	36	36	48.1	Protein disulfide-isomerase A6	Mus musculus
Q3UFB2	Znhit6,Bcd1	0.707911	-0.49836	0.12665		1	9	9	52.2	Box C/D snoRNA protein 1	Mus musculus
Q6P6L0	Filip1l,Doc1	0.706487	-0.501264	0.000474501	331.665	68	744	783	129.8	Filamin A-interacting protein 1-like	Mus musculus
P62281	Rps11	0.705709	-0.502855	0.257902	563.859	22	219	234	18.4	40S ribosomal protein S11	Mus musculus
O08529	Capn2	0.705128	-0.504044	0.236475	94.469	2	18	18	79.9	Calpain-2 catalytic subunit	Mus musculus
Q9WU78	Pdcd6ip,Aip1,Alix	0.705044	-0.504215	0.180256	259.662	6	46	46	96	Programmed cell death 6-interacting protein	Mus musculus
E1U8D0	Soga1,Soga	0.704808	-0.504698	0.0580201	192.157	12	93	93	159.2	Protein SOGA1	Mus musculus
Q9JJJ7	Porcn {ECO:0000312|MGI:MGI:1890212},Porc,Ppn	0.704552	-0.505223	0.367183		1	9	9	52.5	Protein-serine O-palmitoleoyltransferase porcupine	Mus musculus
I7HJS4	Znf683,Gm13060,Zfp683	0.703942	-0.506472	0.283035		1	9	9	50.4	Tissue-resident T-cell transcription regulator protein ZNF683	Mus musculus
Q8CH77	Nav1,Kiaa1151,Pomfil3	0.701766	-0.510937	0.0717834	186.078	8	69	69	202.4	Neuron navigator 1	Mus musculus
Q9DBR3	Armc8	0.701219	-0.512063	0.200633	189.569	5	40	40	75.4	Armadillo repeat-containing protein 8	Mus musculus
Q99JP0	Map4k3	0.699978	-0.514619	0.0217151		1	9	9	101.1	Mitogen-activated protein kinase kinase kinase kinase 3	Mus musculus
A2RTL5	Rsrc2	0.699818	-0.514949	0.382703		1	8	8	43.9	Arginine/serine-rich coiled-coil protein 2	Mus musculus
Q9D8E6	Rpl4	0.699223	-0.516175	0.0847144	449.216	28	309	358	47.2	60S ribosomal protein L4	Mus musculus
P62855	Rps26	0.698888	-0.516867	0.395855	429.864	6	70	88	13	40S ribosomal protein S26	Mus musculus
Q8C863	Itch	0.698322	-0.518036	0.195738		1	9	9	99	E3 ubiquitin-protein ligase Itchy	Mus musculus
P26041	Msn	0.697573	-0.519584	0.0191951	215.328	19	192	200	67.8	Moesin	Mus musculus
Q9D9F8	Mipol1	0.696861	-0.521057	0.240436		1	9	9	31.8	Mirror-image polydactyly gene 1 protein homolog	Mus musculus
Q8BHJ9	Slu7,D11Ertd730e	0.696791	-0.521202	0.0486023		1	9	9	68.1	Pre-mRNA-splicing factor SLU7	Mus musculus
Q8BI84	Mia3,Kiaa0268	0.69633	-0.522157	0.387339		1	9	9	213.7	Melanoma inhibitory activity protein 3	Mus musculus
Q3UTH8	Arhgef9,Kiaa0424	0.695658	-0.523549	0.13003		1	9	9	60.9	Rho guanine nucleotide exchange factor 9	Mus musculus
O08749	Dld	0.695529	-0.523818	0.0709276		1	9	9	54.3	Dihydrolipoyl dehydrogenase, mitochondrial	Mus musculus
Q99ME9	Gtpbp4,Crfg,Nog1	0.695352	-0.524185	0.0241276	239.437	17	156	164	74.1	Nucleolar GTP-binding protein 1	Mus musculus
Q8CI11	Gnl3,Ns	0.693383	-0.528277	0.0262927	326.944	28	291	305	60.8	Guanine nucleotide-binding protein-like 3	Mus musculus
G5E870	Trip12	0.693004	-0.529065	0.0066725	185.459	18	160	167	224.1	E3 ubiquitin-protein ligase TRIP12	Mus musculus
Q61595	Ktn1	0.692611	-0.529883	0.0683269	243.377	15	120	127	152.6	Kinectin	Mus musculus
Q9JJZ6	Klf13,Bteb3,Fklf2	0.691086	-0.533064	0.0577778	80.1494	2	18	18	31.1	Krueppel-like factor 13	Mus musculus
Q3UIW5	Rnf10,Kiaa0262,Rie2,Sid2705	0.687695	-0.540158	0.658227		1	6	6	88.3	RING finger protein 10	Mus musculus
Q8R1G2	Cmbl	0.685995	-0.54373	0.620288	357.437	2	15	15	27.9	Carboxymethylenebutenolidase homolog	Mus musculus
Q5U4C3	Scaf1,Sfrs19	0.684425	-0.547035	0.054067		1	9	9	133.8	Splicing factor, arginine/serine-rich 19	Mus musculus
P68181	Prkacb,Pkacb	0.684264	-0.547376	0.276984		1	6	6	40.7	cAMP-dependent protein kinase catalytic subunit beta	Mus musculus
Q9DBH0	Wwp2	0.683055	-0.549926	0.231466		1	9	9	98.8	NEDD4-like E3 ubiquitin-protein ligase WWP2	Mus musculus
Q6PDY0	Ccdc85b,Dipa	0.680834	-0.554626	0.395091		1	9	9	22.1	Coiled-coil domain-containing protein 85B	Mus musculus
P61255	Rpl26	0.679974	-0.556447	0.0447238	399.359	28	351	351	17.3	60S ribosomal protein L26	Mus musculus
Q9CY66	Gar1,Nola1	0.6792	-0.558091	0.5164	295.348	3	24	32	23.5	H/ACA ribonucleoprotein complex subunit 1	Mus musculus
P97479	Myo7a,Myo7	0.678686	-0.559184	0.295593	165.982	3	20	20	254.9	Unconventional myosin-VIIa	Mus musculus
Q9D7I8	Fam83d	0.677263	-0.562213	0.0586463		1	9	9	64.3	Protein FAM83D	Mus musculus
Q99JR8	Smarcd2,Baf60b	0.677238	-0.562266	0.183929		1	9	9	59.1	SWI/SNF-related matrix-associated actin-dependent regulator of chromatin subfamily D member 2	Mus musculus
Q06185	Atp5i,Atp5k,Lfm-1,Lfm1	0.676266	-0.564337	0.520772		1	9	20	8.2	ATP synthase subunit e, mitochondrial	Mus musculus
Q9JIW9	Ralb	0.675319	-0.566358	0.142818	78.0359	3	27	27	23.3	Ras-related protein Ral-B	Mus musculus
P59759	Mkl2,Mrtfb	0.674769	-0.567533	0.1058		1	9	9	117.5	MKL/myocardin-like protein 2	Mus musculus
Q80Z19	Muc2	0.674455	-0.568205	0.625284		1	4	4	293.4	Mucin-2 (Fragments)	Mus musculus
P83741	Wnk1,Hsn2,Prkwnk1	0.673891	-0.569413	0.00094021	393.339	76	881	1026	250.9	Serine/threonine-protein kinase WNK1	Mus musculus
Q8CCE9	E4f1	0.672241	-0.57295	0.110033		1	9	9	84.3	Transcription factor E4F1	Mus musculus
Q9WVL0	Gstz1,Maai	0.671954	-0.573566	0.37389		1	8	8	24.3	Maleylacetoacetate isomerase	Mus musculus
Q8CJ67	Stau2	0.671553	-0.574427	0.0108584	274.776	25	261	321	62.5	Double-stranded RNA-binding protein Staufen homolog 2	Mus musculus
Q9QVP9	Ptk2b,Fak2,Pyk2,Raftk	0.670875	-0.575883	0.0847144		1	8	8	115.8	Protein-tyrosine kinase 2-beta	Mus musculus
P12367	Prkar2a	0.670091	-0.577572	0.385497	286.094	4	32	51	45.4	cAMP-dependent protein kinase type II-alpha regulatory subunit	Mus musculus
P42128	Foxk1,Mnf	0.667972	-0.58214	0.638219	419.658	2	15	15	74.9	Forkhead box protein K1	Mus musculus
Q61414	Krt15,Krt1-15	0.66685	-0.584566	0.619061		1	7	15	49.1	Keratin, type I cytoskeletal 15	Mus musculus
Q8K371	Amotl2	0.665332	-0.587853	0.245744		1	9	9	85.3	Angiomotin-like protein 2	Mus musculus
P61219	Polr2f	0.66458	-0.589485	0.0311778		1	9	9	14.5	DNA-directed RNA polymerases I, II, and III subunit RPABC2	Mus musculus
Q9DAW6	Prpf4	0.664415	-0.589844	0.0915764	109.548	4	35	35	58.4	U4/U6 small nuclear ribonucleoprotein Prp4	Mus musculus
Q9R045	Angptl2,Arp2	0.664408	-0.589859	0.302324		1	8	8	57.1	Angiopoietin-related protein 2	Mus musculus
P49312	Hnrnpa1,Fli-2,Hnrpa1,Tis	0.660172	-0.599087	0.0872795	377.291	16	180	218	34.2	Heterogeneous nuclear ribonucleoprotein A1	Mus musculus
Q9EQ61	Pes1,Pes	0.660151	-0.599131	0.271775	327.058	8	76	76	67.8	Pescadillo homolog	Mus musculus
O55128	Sap18	0.660125	-0.59919	0.0931207		1	9	17	17.6	Histone deacetylase complex subunit SAP18	Mus musculus
Q8VIJ6	Sfpq	0.658761	-0.602173	0.00438868	347.729	52	536	558	75.4	Splicing factor, proline- and glutamine-rich	Mus musculus
Q9DCH4	Eif3f,Eif3s5	0.657121	-0.60577	0.213329	246.018	8	68	101	38	Eukaryotic translation initiation factor 3 subunit F	Mus musculus
P56959	Fus	0.656961	-0.606121	0.251501	454.181	11	138	171	52.7	RNA-binding protein FUS	Mus musculus
Q9CR57	Rpl14	0.653302	-0.614178	0.244744	391.392	11	111	126	23.6	60S ribosomal protein L14	Mus musculus
P01942	Hba,Hba-a1	0.65301	-0.614824	0.0277664	34.4471	2	18	18	15.1	Hemoglobin subunit alpha	Mus musculus
D3YZU1	Shank1	0.652105	-0.616824	0.146263		1	9	9	226.3	SH3 and multiple ankyrin repeat domains protein 1	Mus musculus
Q8R2M2	Dnttip2	0.650045	-0.621388	0.0740076		1	9	9	84.3	Deoxynucleotidyltransferase terminal-interacting protein 2	Mus musculus
Q6P542	Abcf1	0.649974	-0.621546	0.00115608	227.553	28	304	328	94.9	ATP-binding cassette sub-family F member 1	Mus musculus
Q9CY57	Chtop,Fop,MNCb-1706	0.649052	-0.623594	0.0611386	243.843	12	124	124	26.6	Chromatin target of PRMT1 protein	Mus musculus
Q9CX86	Hnrnpa0,Hnrpa0	0.648837	-0.624072	0.0370314	296.687	13	178	185	30.5	Heterogeneous nuclear ribonucleoprotein A0	Mus musculus
P63330	Ppp2ca	0.646962	-0.628246	0.173046		1	9	9	35.6	Serine/threonine-protein phosphatase 2A catalytic subunit alpha isoform	Mus musculus
Q8BUK6	Hook3	0.644531	-0.633678	0.159956	115.82	4	32	32	83.2	Protein Hook homolog 3	Mus musculus
Q80VD1	Fam98b	0.643879	-0.635139	0.132643	213.097	7	63	63	45.3	Protein FAM98B	Mus musculus
Q3UW53	Fam129a,Niban	0.643328	-0.636374	0.0562496		1	9	9	102.6	Protein Niban	Mus musculus
Q8C4J7	Tbl3	0.642001	-0.639352	0.0558955		1	6	6	88.3	Transducin beta-like protein 3	Mus musculus
Q9D826	Pipox,Pso	0.641945	-0.639478	0.232459		1	9	9	43.8	Peroxisomal sarcosine oxidase	Mus musculus
P97465	Dok1,Dok	0.641205	-0.641142	0.00381139	30.0718	2	18	18	52.5	Docking protein 1	Mus musculus
Q8BK35	Nop53,Gltscr2,Pict1	0.640581	-0.642547	0.111227	225.531	7	64	64	55.8	Ribosome biogenesis protein NOP53	Mus musculus
Q8R323	Rfc3	0.639878	-0.644132	0.117501	131.454	4	32	32	40.5	Replication factor C subunit 3	Mus musculus
Q9CX11	Utp23	0.638152	-0.648028	0.0770455		1	9	9	28.4	rRNA-processing protein UTP23 homolog	Mus musculus
A6PWD2	Fhad1	0.637166	-0.650259	0.025059		1	9	9	163.7	Forkhead-associated domain-containing protein 1	Mus musculus
Q99NH0	Ankrd17,Foe,Gtar,Kiaa0697	0.636225	-0.652392	0.0266458	185.171	12	95	103	274.2	Ankyrin repeat domain-containing protein 17	Mus musculus
Q8BP47	Nars	0.633397	-0.658818	0.0379701	146.658	7	60	69	64.3	Asparagine--tRNA ligase, cytoplasmic	Mus musculus
Q9WUM4	Coro1c	0.632823	-0.660126	0.0266052	80.057	2	27	27	53.1	Coronin-1C	Mus musculus
Q3UJB9	Edc4	0.632267	-0.661395	0.0334917	187.355	9	84	90	152.5	Enhancer of mRNA-decapping protein 4	Mus musculus
Q8BG05	Hnrnpa3,Hnrpa3	0.631485	-0.66318	0.0590187	362.024	20	265	323	39.7	Heterogeneous nuclear ribonucleoprotein A3	Mus musculus
Q9Z108	Stau1,Stau	0.630904	-0.664508	0.000624652	219.329	32	341	356	53.9	Double-stranded RNA-binding protein Staufen homolog 1	Mus musculus
P62918	Rpl8	0.630369	-0.665732	0.00387162	223.634	19	234	267	28	60S ribosomal protein L8	Mus musculus
Q9CXK8	Nip7	0.629985	-0.66661	0.32654		1	9	9	20.5	60S ribosome subunit biogenesis protein NIP7 homolog	Mus musculus
Q9CW46	Raver1,Kiaa1978	0.629689	-0.667289	0.342426		1	8	8	79.4	Ribonucleoprotein PTB-binding 1	Mus musculus
Q8CFA2	Amt	0.629368	-0.668024	0.745304	673.772	2	18	25	44	Aminomethyltransferase, mitochondrial	Mus musculus
Q7TPV4	Mybbp1a,P160	0.62896	-0.66896	0.00126509	243.933	37	336	345	152	Myb-binding protein 1A	Mus musculus
Q3UMT1	Ppp1r12c,Mbs85	0.628874	-0.669157	0.0043271	144.305	14	117	117	84.7	Protein phosphatase 1 regulatory subunit 12C	Mus musculus
P52432	Polr1c,Rpo1-1	0.625437	-0.677064	0.00452031		1	9	9	39.1	DNA-directed RNA polymerases I and III subunit RPAC1	Mus musculus
Q99PU8	Dhx30,Helg	0.623057	-0.682565	0.000565196	233.188	39	343	384	136.7	Putative ATP-dependent RNA helicase DHX30	Mus musculus
Q8JZQ9	Eif3b,Eif3s9	0.622023	-0.68496	0.0204056	221.064	14	149	164	91.4	Eukaryotic translation initiation factor 3 subunit B	Mus musculus
Q9WVR4	Fxr2,Fxr2h	0.621897	-0.685252	0.052711	331.61	25	231	286	73.7	Fragile X mental retardation syndrome-related protein 2	Mus musculus
Q9CXW4	Rpl11	0.619716	-0.690321	0.258266	382.393	9	101	134	20.3	60S ribosomal protein L11	Mus musculus
P09055	Itgb1	0.619452	-0.690935	0.026196	70.8445	2	18	23	88.2	Integrin beta-1	Mus musculus
P62900	Rpl31	0.618868	-0.692297	0.0128958	290.558	23	274	282	14.5	60S ribosomal protein L31	Mus musculus
O70126	Aurkb,Aik2,Aim1,Airk2,Ark2,Stk1,Stk12,Stk5	0.618582	-0.692963	0.177655		1	9	9	39.4	Aurora kinase B	Mus musculus
Q9CWV6	Prkrip1	0.618044	-0.694218	0.322131	239.685	3	27	27	21.5	PRKR-interacting protein 1	Mus musculus
[truncated: 702 more rows]
